# Supplementary material
Source: publisher site journal article supplement (doi:10.3762/bjoc.2.15)
Supplement: Additional file 1 [file 1860-5397-2-15-S1.pdf]

## Supplementary data as an aid to the referees

### Hydrogenation of aromatic ketones, aldehydes, and epoxides with hydrogen and Pd(0)EnCat<sup>TM</sup> 30NP.

Steven V. Ley<sup>a</sup>, Angus J. P. Stewart-Liddon<sup>b</sup>, David Pears<sup>b</sup>, Remedios H. Perni<sup>b,\*</sup>, Kevin Treacher<sup>b</sup>

*a- Department of Chemistry, University of Cambridge, Lensfield Road, Cambridge (UK) CB2 1EW*

*b- Reaxa Ltd, Hexagon Tower, Blackley, Manchester (UK) M9 8ZS*

Email: Steven V. Ley – [svl1000@cam.ac.uk](mailto:svl1000@cam.ac.uk); Angus J. P. Stewart-Liddon – [angus.liddon@reaxa.co.uk](mailto:angus.liddon@reaxa.co.uk); David Pears – [david.pears@reaxa.co.uk](mailto:david.pears@reaxa.co.uk); Remedios H. Perni – [remediosperni@reaxa.co.uk](mailto:remediosperni@reaxa.co.uk); Kevin Treacher – [kevin.treacher@reaxa.co.uk](mailto:kevin.treacher@reaxa.co.uk)

\* Corresponding author

**General:** The compounds described in this paper were prepared according to the procedure discussed in the text by the authors. All starting materials were purchased from Sigma-Aldrich and used without further purification. All reaction products were identified by comparison with their <sup>1</sup>H NMR spectra versus authentic <sup>1</sup>H NMR obtained from Sigma-Aldrich database and/or the authentic sample. Conversions were calculated from the <sup>1</sup>H NMR spectrum based on the disappearance of the starting material. <sup>1</sup>H NMR spectra were recorded on a Bruker DPX300 300 MHz NMR spectrometer at room temperature. Chemical shifts are reported in ppm on the  $\delta$  scale relative to the internal standard TMS.

#### Table (1)

4-Methoxybenzyl alcohol: <sup>1</sup>H NMR (CDCl<sub>3</sub>):  $\delta$  7.28 (2H, m, Ar), 6.89 (2H, m, Ar), 4.61 (2H, s, CH<sub>2</sub>), 3.81 (3H, s, CH<sub>3</sub>), 1.71 (1H, broad s, OH). In agreement with Sigma Aldrich database  
<http://www.sigmaaldrich.com/catalog/search/ProductDetail/ALDRICH/136905>

4-Methylanisole: <sup>1</sup>H NMR (CDCl<sub>3</sub>):  $\delta$  7.01 (2H, m, Ar), 6.80 (2H, m, Ar), 3.78 (3H, s, CH<sub>3</sub>), 2.27 (3H, s, CH<sub>3</sub>). In agreement with Sigma Aldrich database  
<http://www.sigmaaldrich.com/catalog/search/ProductDetail/FLUKA/61050>

4-Methoxy-alpha-methylbenzyl alcohol: <sup>1</sup>H NMR (CDCl<sub>3</sub>):  $\delta$  7.30 (2H, m, Ar), 6.88 (2H, m, Ar), 4.86 (1H, q,  $J$  = 6.44 Hz, CH), 3.81 (3H, s, CH<sub>3</sub>), 1.70 (1H, broad s, OH), 1.48 (3H, d,  $J$  = 6.44 Hz, CH<sub>3</sub>). In agreement with commercially available sample.

#### Table (2)

2-Methoxy benzylalcohol: <sup>1</sup>H NMR (CDCl<sub>3</sub>)  $\delta$  7.29-7.23 (2H, m, Ar), 6.96-6.86 (2H, m, Ar), 4.67 (2H, s, CH<sub>2</sub>), 3.84 (3H, s, CH<sub>3</sub>), 2.47 (1H, s, OH) in agreement with the Sigma Aldrich database.  
<http://www.sigmaaldrich.com/catalog/search/ProductDetail/ALDRICH/M10808>

2,3-Methylenedioxy benzylalcohol:  $^1\text{H}$  NMR ( $\text{CDCl}_3$ )  $\delta$  6.86-6.75 (3H, m, Ar), 5.95 (2H, s,  $\text{CH}_2$ ), 4.66 (2H, s,  $\text{CH}_2$ ), 2.16 (1H, bs, OH) in agreement with data published by Roesch KR, Larock RC, *J Org Chem* 2002, **67**: 86.

2,4-Bistrifluoromethyl benzylalcohol:  $^1\text{H}$  NMR ( $\text{CDCl}_3$ )  $\delta$  7.96-7.84 (3H, m, Ar), 4.97 (2H, s,  $\text{CH}_2$ ), 2.11 (1H, bs, 2H).

4-Fluorobenzaldehyde:  $^1\text{H}$  NMR ( $\text{CDCl}_3$ )  $\delta$  7.27 (2H, m), 7.00 (2H, m), 4.58 (2H, s), 3.88 (1H, bs, OH) in agreement with the Sigma Aldrich database.

<http://www.sigmaaldrich.com/catalog/search/ProductDetail/FLUKA/46765>

4-Fluorobenzoic acid:  $^1\text{H}$  NMR ( $\text{CDCl}_3$ )  $\delta$  8.05 (2H, m), 7.09 (2H, m) in agreement with the Sigma Aldrich database. <http://www.sigmaaldrich.com/catalog/search/ProductDetail/FLUKA/46600>

### Table (3)

2-phenyl-1-phenylethanol:  $^1\text{H}$  NMR ( $\text{CDCl}_3$ ):  $\delta$  7.40-7.15 (10H, m, Ar), 4.89 (1H, m, CH), 3.10-2.90 (2H, m,  $\text{CH}_2$ ), 1.95 (1H, broad s OH) In agreement with data published by Blake AJ, Cunningham A, Ford A, Teat SJ, Woodward S, *Chem Eur J* 2000, **6**:3586.

Dibenzyl:  $^1\text{H}$  NMR ( $\text{CDCl}_3$ ):  $\delta$  7.35-7.25 (10H, m, Ar), 2.92 (4H, s,  $2\times\text{CH}_2$ ). In agreement with Sigma Aldrich database.

<http://www.sigmaaldrich.com/catalog/search/ProductDetail/FLUKA/14330>

### Table (4)

2-Phenylethanol:  $^1\text{H}$  NMR ( $\text{CDCl}_3$ )  $\delta$  7.40-7.21 (5H, m, Ar), 3.85 (2H, t,  $J = 6.6$  Hz,  $\text{CH}_2$ ), 2.86 (2H, t,  $J = 6.6$  Hz,  $\text{CH}_2$ ), 1.55 (1H, bs, OH) in agreement with data published by Ley, SV, Mitchell C, Pears D, Ramaro C, Yu J-Q, Zhou W, *Org Lett*, 2003, **5**:4665.

2-(4'-Fluorophenyl) ethanol:  $^1\text{H}$  NMR ( $\text{CDCl}_3$ )  $\delta$  7.21-7.16 (2H, m, Ar), 7.03-6.96 (2H, m, Ar), 3.84 (2H, t,  $J = 6.6$  Hz,  $\text{CH}_2$ ), 2.84 (2H, t,  $J = 6.6$  Hz,  $\text{CH}_2$ ), 1.49 (1H, bs, OH) in agreement data published by Ley, SV, Mitchell C, Pears D, Ramaro C, Yu J-Q, Zhou W, *Org Lett*, 2003, **5**:4665.

1-Phenyl propan-2-ol:  $^1\text{H}$  NMR ( $\text{CDCl}_3$ )  $\delta$  7.32-7.12 (5H, m, Ar), 4.04-3.93 (1H, m, CH), 2.78-2.64 (2H, m,  $\text{CH}_2$ ), 1.88 (1H, bs, OH), 1.21 (3H, d,  $J = 6.3$  Hz,  $\text{CH}_3$ ) in agreement data published by Ley, SV, Mitchell C, Pears D, Ramaro C, Yu J-Q, Zhou W, *Org Lett*, 2003, **5**:4665.

3-Phenyl propane-1,2-diol:  $^1\text{H}$  NMR ( $\text{CDCl}_3$ )  $\delta$  7.37-7.20 (5H, m, Ar), 3.96-3.88 (m, 1H,  $\text{CHOH}$ ), 3.66 (1H, dd,  $J = 11.1, 3.0$  Hz,  $\text{CHH}$ ), 3.49 (1H, dd,  $J = 11.1, 6.9$  Hz,  $\text{CHH}$ ), 2.82-2.69 (2H, m,  $\text{CH}_2$ ), 2.47 (2H, bs,  $2\times\text{OH}$ ) in agreement data published by Ley, SV, Mitchell C, Pears D, Ramaro C, Yu J-Q, Zhou W, *Org Lett*, 2003, **5**:4665.

```
;zg30
;advance-version (02/05/31)
;ld sequence
;using 30 degree flip angle
```

```
#include <Avance.incl>
```

```
1 ze
2 30m
d1
p1*0.33 ph1
go=2 ph31
30m mc #0 to 2 F0(zd)
exit
```

```
ph1=0 2 2 0 1 3 3 1
ph31=0 2 2 0 1 3 3 1
```

```
;p1 : f1 channel - power level for pulse (default
;p1 : f1 channel - 90 degree high power pulse
;d1 : relaxation delay; 1-5 * T1
```

TABLE 1 ENTRY 1

```
Current Data Parameters
NAME 10375595
EXPNO 10
PROCNO 1

F2 - Acquisition Parameters
Date_ 20051111
Time 15.37
INSTRUM dpx300
PROBHD 5 mm QNP 1H/1
PULPROG zg30
TD 48848
SOLVENT CDCl3
NS 64
DS 2
SWH 7181.908 Hz
FIDRES 0.147067 Hz
AQ 3.398709 sec
RG 322.5
DE 69.600 usec
TE 299.2 K
D1 6.59999990 sec
MCREST 0.00000000 sec
MCWRK 0.01500000 sec

===== CHANNEL f1 =====
NUC1 1H
P1 9.40 usec
PL1 0.00 dB
SFO1 300.1330010 MHz

F2 - Processing parameters
SI 65536
SF 300.13300071 MHz
WDW EM
SSB 0
LB 0.30 Hz
GB 0
PC 2.00
```

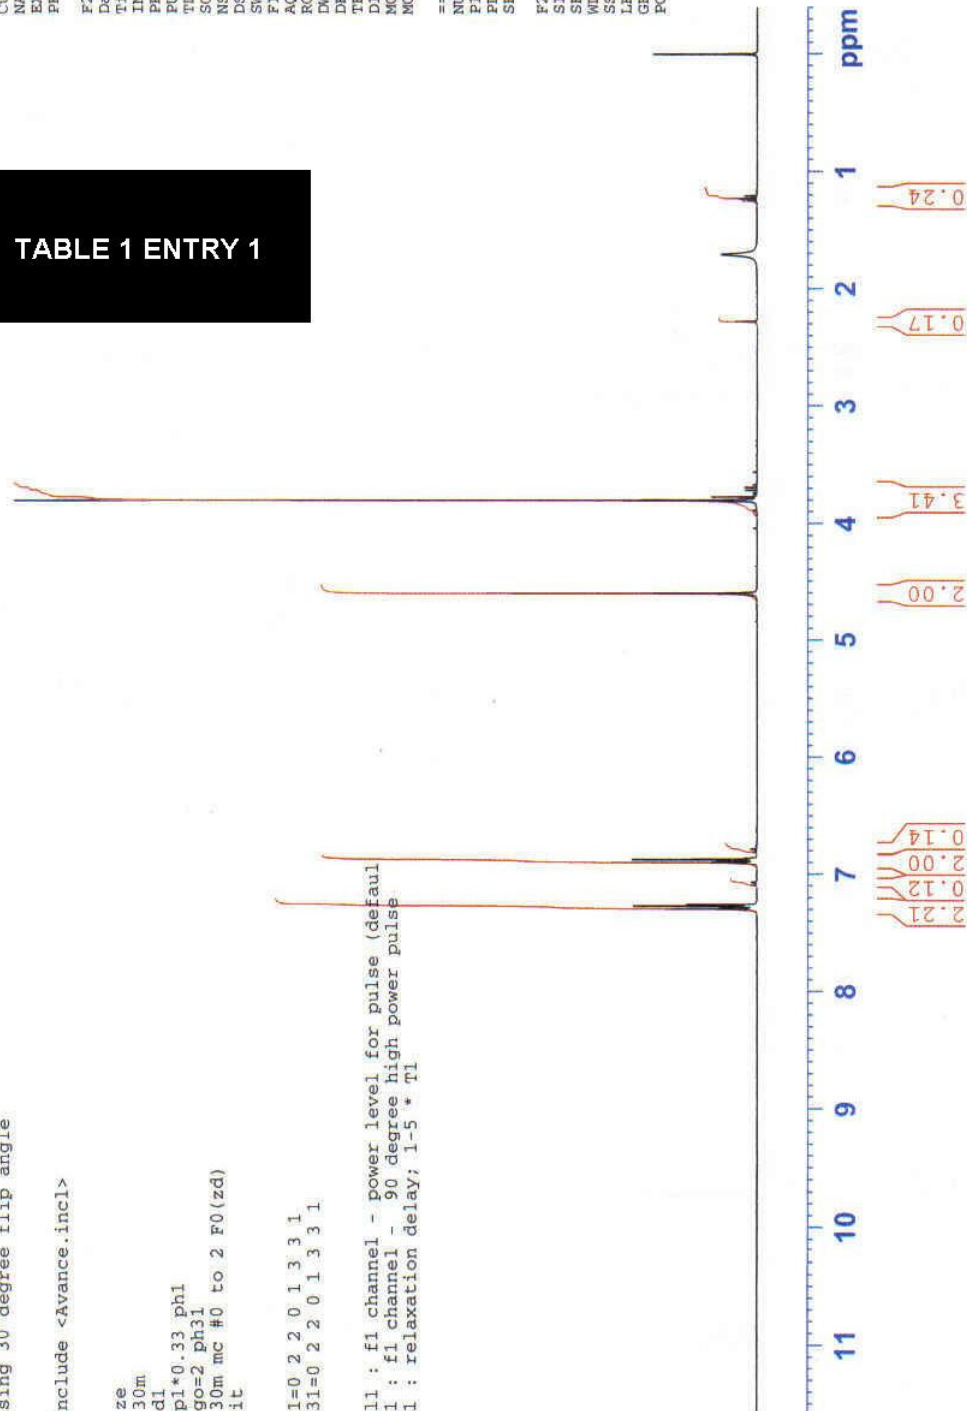

S.N 2  
1111105

```
;zg30
;advance-version (02/05/31)
;ID sequence
;using 30 degree flip angle
```

```
#include <Advance.incl>
```

```
1 ze
2 30m
d1
p1*0.33 ph1
go=2 ph31
30m mc #0 to 2 F0(zd)
exit
```

```
ph1=0 2 2 0 1 3 3 1
ph31=0 2 2 0 1 3 3 1
```

```
;p1 : f1 channel - power level for pulse (default)
;p1 : f1 channel - 90 degree high power pulse
;d1 : relaxation delay: 1-5 * T1
```

```
Current Data Parameters
NAME      10375595
EXPNO     10
PROCNO    1

F2 - Acquisition Parameters
Date_     20051111
Time      15:37
INSTRUM   dpx300
PROBHD    5 mm QNP 1H/1
PULPROG   zg30
TD         48848
SOLVENT   CDCl3
NS         64
DS         2
SWH        7183.908 Hz
FIDRES     0.147067 Hz
AQ         3.3998709 sec
RG         322.5
DW         69.600 usec
DE         6.00 usec
TE         299.2 K
D1         6.59999990 sec
MCREST     0.00000000 sec
MCWRK     0.01500000 sec

===== CHANNEL f1 =====
NUC1       1H
P1         9.40 usec
PL1        0.00 dB
SFO1       300.1330010 MHz

F2 - Processing parameters
SI         65536
SF         300.1300071 MHz
WDW        EM
SSB        0
LB         0.30 Hz
GB         0
PC         2.00
```

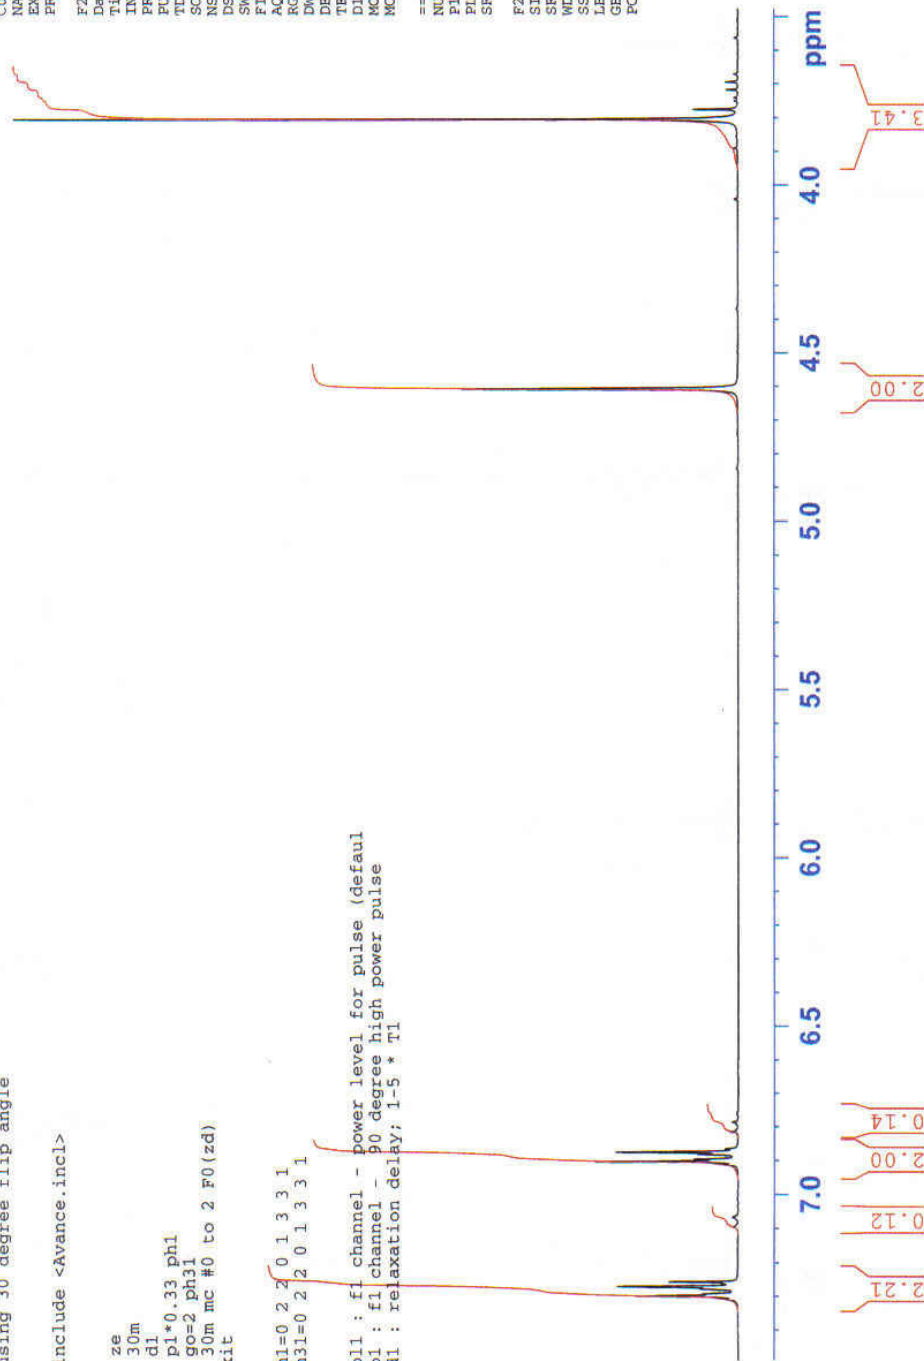

```
;zg30
;advance-version (02/05/31)
;ld sequence
;using 30 degree flip angle
```

```
#include <Avance.incl>
```

```
1 ze
2 30m
d1
p1*0.33 ph1
go=2 ph31
30m mc #0 to 2 F0(zd)
exit
```

```
ph1=0 2 2 0 1 3 3 1
ph31=0 2 2 0 1 3 3 1
```

```
;p11 : f1 channel - power level for pulse (default
;p1 : f1 channel - 90 degree high power pulse
;d1 : relaxation delay; 1-5 * T1
```

TABLE 1 ENTRY 2

```
Current Data Parameters
NAME 10376150
EXPNO 10
PROCNO 1

F2 - Acquisition Parameters
Date_ 20051125
Time 19.10
INSTRUM dpx300
PROBHD 5 mm QNP 1H/1
PULPROG zg30
TD 48848
SOLVENT CDCL3
NS 64
DS 2
SWH 7183.908 Hz
FIDRES 0.147067 Hz
AQ 3.3988709 sec
RG 406.4
DE 69.600 usec
TE 299.2 K
DL 6.5999990 sec
MCREST 0.0000000 sec
MCWRR 0.0150000 sec

===== CHANNEL f1 =====
NUC1 1H
P1 9.40 usec
PL1 0.00 dB
SFO1 300.1330010 MHz

F2 - Processing parameters
SI 65536
SF 300.1330073 MHz
WDW EM
SSB 0
LB 0.30 Hz
GB 0
PC 2.00
```

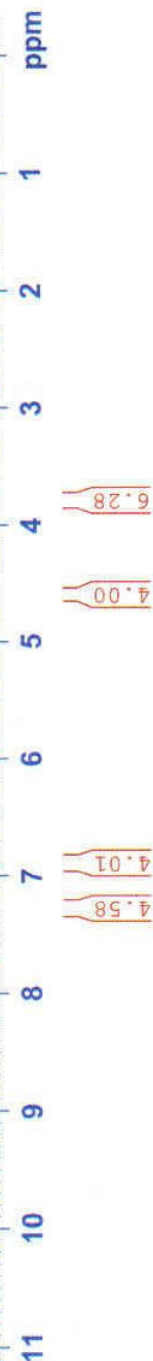

*P. Dub*  
7/10/05

10376150, NBZ5781/10/4, BRUKER DPX300, QNP, H1 SPECTRUM, SOLV:-CDCL3/TMS

Intertek ASG

Current Data Parameters  
NAME 10376150  
EXNO 10  
PROCNO 1

F2 - Acquisition Parameters  
Date\_ 20051125  
Time 19.10  
INSTRUM dpx300  
PROBHD 5 mm QNP 1H/1  
PULPROG zg30  
TD 48848  
SOLVENT CDCL3  
NS 64  
DS 2  
SWH 7183.908 Hz  
FIDRES 0.147067 Hz  
AQ 3.3998709 sec  
RG 406.4  
DW 69.600 usec  
DE 6.00 usec  
TE 299.2 K  
D1 6.59999990 sec  
MCREST 0.00000000 sec  
MCWREK 0.01500000 sec

===== CHANNEL f1 =====  
NUC1 1H  
P1 9.40 usec  
PL1 0.00 dB  
SFO1 300.1330010 MHz

F2 - Processing parameters  
SI 65536  
SF 300.1300073 MHz  
WDW EM  
SSB 0  
LB 0.30 Hz  
GB 0  
FC 2.00

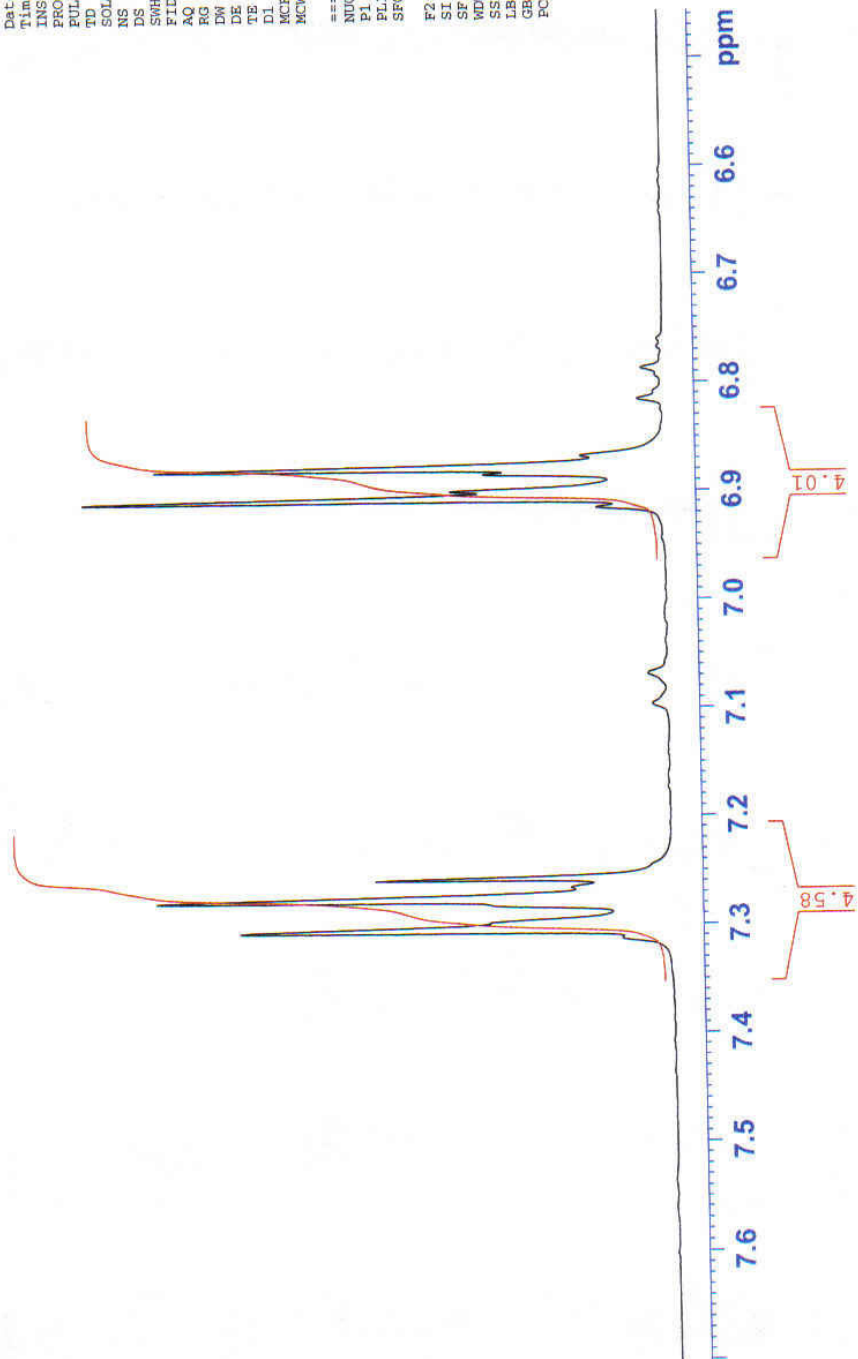



```
;zg30
;advance-version (02/05/31)
;1d sequence
;using 30 degree flip angle
```

```
#include <Advance.incl>
```

```
1 ze
2 30m
  d1
  p1*0.33 ph1
  go=2 ph31
  30m mc #0 to 2 F0(zd)
  exit
```

```
ph1=0 2 2 0 1 3 3 1
ph31=0 2 2 0 1 3 3 1
```

```
;p11 : f1 channel - power level for pulse (default)
;p1 : f1 channel - 90 degree high power pulse
;d1 : relaxation delay: 1-5 * T1
```

## TABLE 1 ENTRY 3

```
Current Data Parameters
NAME      10375597
EXPNO     10
PROCNO     1

F2 - Acquisition Parameters
Date_      20051111
Time       16.03
INSTRUM    dpx300
PROBHD     5 mm QNP 1H/1
PULPROG    zg30
TD          48848
SOLVENT    CDCl3
NS          64
DS          2
SWH         7183.908 Hz
FIDRES      0.147067 Hz
AQ          3.3998709 sec
RG          362
DE          69.600 usec
TE          299.2 K
DL          6.5999990 sec
MCREST      0.0000000 sec
MCWRK      0.01500000 sec

===== CHANNEL f1 =====
NUC1        1H
P1          9.40 usec
PL1         0.00 dB
SFO1        300.1330010 MHz

F2 - Processing parameters
SI          65536
SF          300.1300068 MHz
WDW         EM
SSB         0
LB          0.30 Hz
GB          0
PC          2.00
```

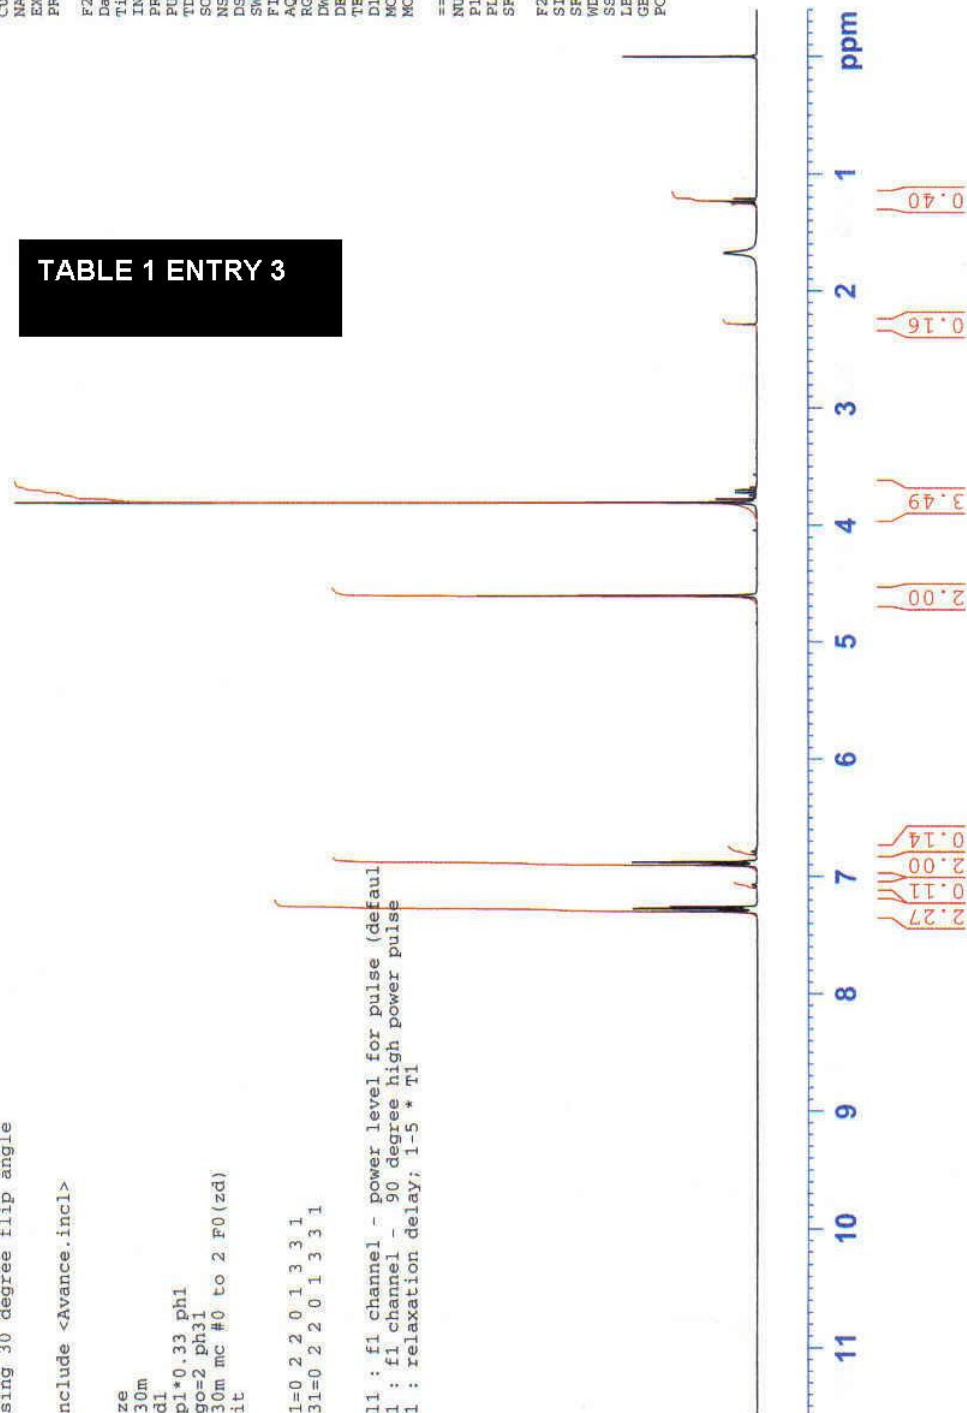

S.M. Z

111115

```
;zg30
;advance-version (02/05/31)
;1D sequence
;using 30 degree flip angle
```

```
#include <Avance.incl>
```

```
1 ze
2 30m
d1
p1*0.33 ph1
go=2 ph31
30m mc #0 to 2 F0(zd)
exit
```

```
ph1=0.2 2 0 1 3 3 1
ph31=0.2 2 0 1 3 3 1
```

```
;p1 : f1 channel - power level for pulse (default
;p1 : f1 channel - 90 degree high power pulse
;di : relaxation delay; 1-5 * T1
```

```
Current Data Parameters
NAME 10375597
EXPNO 10
PROCNO 1

F2 - Acquisition Parameters
Date_ 20051111
Time 16.03
INSTRUM dpx300
PROBHD 5 mm QNP 1H/1
PULPROG zg30
TD 48848
SOLVENT CDCl3
NS 64
DS 4
SWH 7183.906 Hz
FIDRES 0.147067 Hz
AQ 3.3998709 sec
RG 362
DE 69.600 usec
TE 299.2 K
D1 6.59999990 sec
MCREST 0.00000000 sec
MCWRK 0.01500000 sec

===== CHANNEL f1 =====
NUC1 1H
P1 9.40 usec
PL1 0.00 dB
SFO1 300.1330010 MHz

F2 - Processing parameters
SI 65536
SF 300.1300068 MHz
WDW EM
SSB 0
LB 0.30 Hz
GB 0
PC 2.00
```

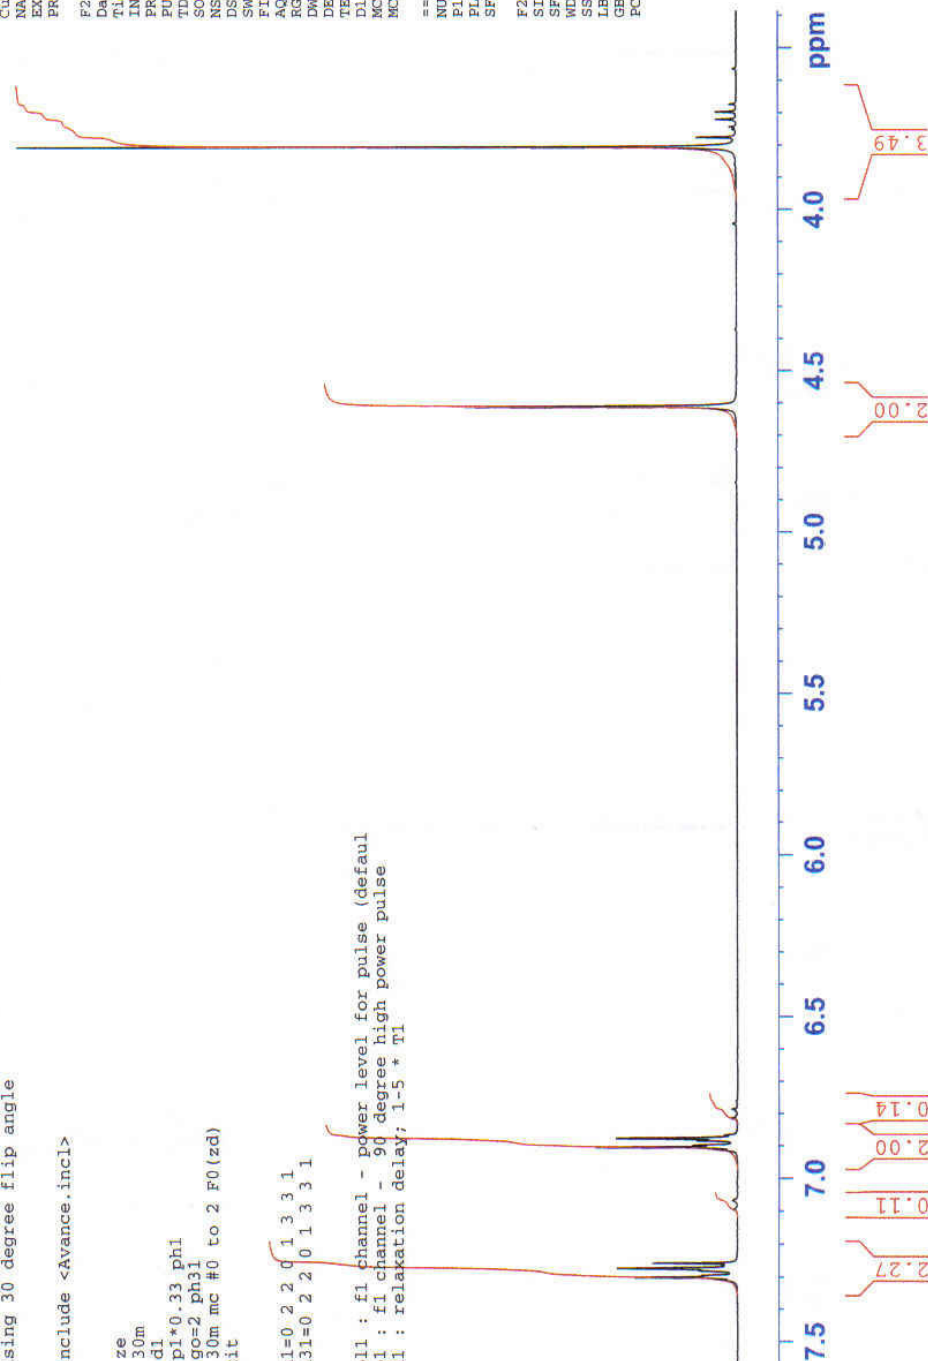

S.M.D  
11/11/05



```
;zg30
;advance-version (02/05/31)
;1d sequence
;using 30 degree flip angle
```

```
#include <Avance.incl>
```

```
1 ze
2 30m
  d1
  p1*0.33 ph1
  go=2 ph31
  30m mc #0 to 2 F0(zd)
  exit
```

```
ph1=0 2 2 0 1 3 3 1
ph31=0 2 2 0 1 3 3 1
```

```
;p11 : f1 channel - power level for pulse (default)
;p1 : f1 channel - 90 degree high power pulse
;d1 : relaxation delay; 1-5 * T1
```

## TABLE 1 ENTRY 4

```
Current Data Parameters
NAME      10376711
EXPNO     10
PROCNO    1

F2 - Acquisition Parameters
Date_     20051207
Time      15.23
INSTRUM   dpx300
PROBHD    5 mm QNP 1H/1
PULPROG   zg30
TD        48848
SOLVENT   CDCL3
NS        64
DS        2
SWH        7183.908 Hz
FIDRES    0.147067 Hz
AQ        3.3998709 sec
RG        512
DE        69.600 usec
TE        299.2 K
D1        6.5999990 sec
MCREST    0.0000000 sec
MCWPRK    0.0150000 sec

===== CHANNEL f1 =====
NUC1      1H
P1        9.40 usec
PL1       0.00 dB
SFO1      300.1330010 MHz

F2 - Processing parameters
SI        65536
SF        300.1330075 MHz
WDW       EM
SSB       0
LB        0.30 Hz
GB        0
PC        2.00
```

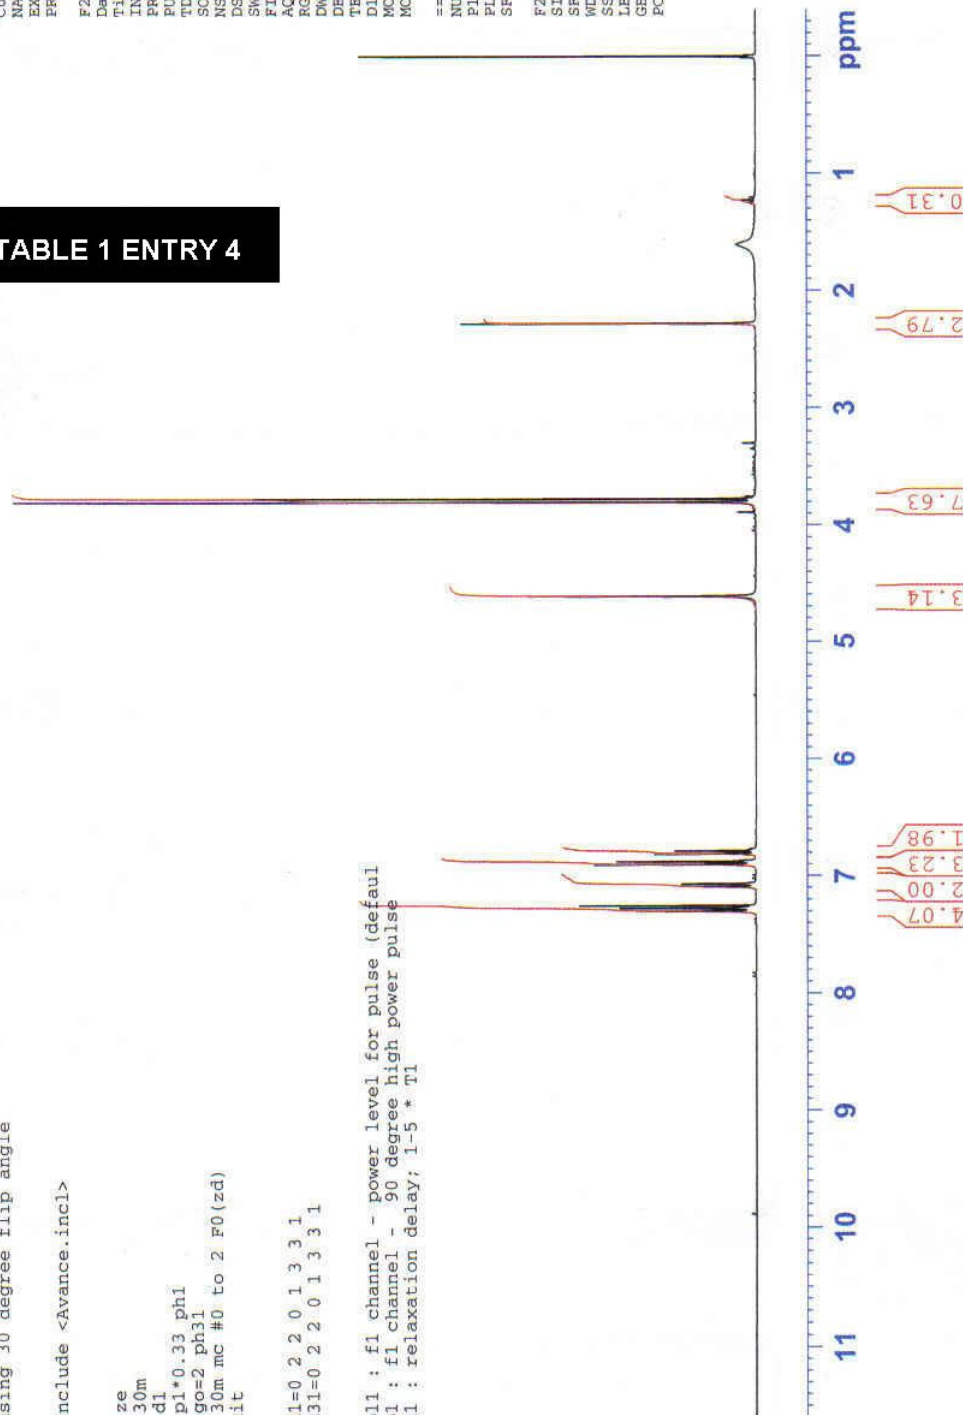

```

;zg30
;advance-version (02/05/31)
;ID sequence
;using 30 degree flip angle

```

```

#include <Avance.incl>

```

```

1 ze
2 30m
d1
p1+0.33 ph1
go=2 ph31
30m mc #0 to 2 F0(zd)
exit

```

```

ph1=0 2 2 0 1 3 3 1
ph31=0 2 2 0 1 3 3 1

```

```

;p11 : f1 channel - power level for pulse (default)
;p1 : f1 channel - 90 degree high power pulse
;d1 : relaxation delay; 1-5 * T1

```

```

Current Data Parameters
NAME      10376711
EXPNO     10
PROCNO    1

F2 - Acquisition Parameters
Date_     20051207
Time      15.23
INSTRUM   dpx300
PROBHD    5 mm QNP 1H/1
PULPROG   zg30
TD         48848
SOLVENT   CDCL3
NS         64
DS         2
SWH        7183.908 Hz
FIDRES     0.147067 Hz
AQ         3.3998709 sec
RG         512
DM         69.600 usec
DE         6.00 usec
TE         299.2 K
D1         6.59999990 sec
MCREST     0.00000000 sec
MCWK      0.01500000 sec

===== CHANNEL f1 =====
NUC1       1H
P1         9.40 usec
PL1        0.00 dB
SFO1       300.1330010 MHz

F2 - Processing parameters
SI         65536
SF         300.1300075 MHz
WDW        EM
SSB        0
LB         0.30 Hz
GB         0
PC         2.00

```

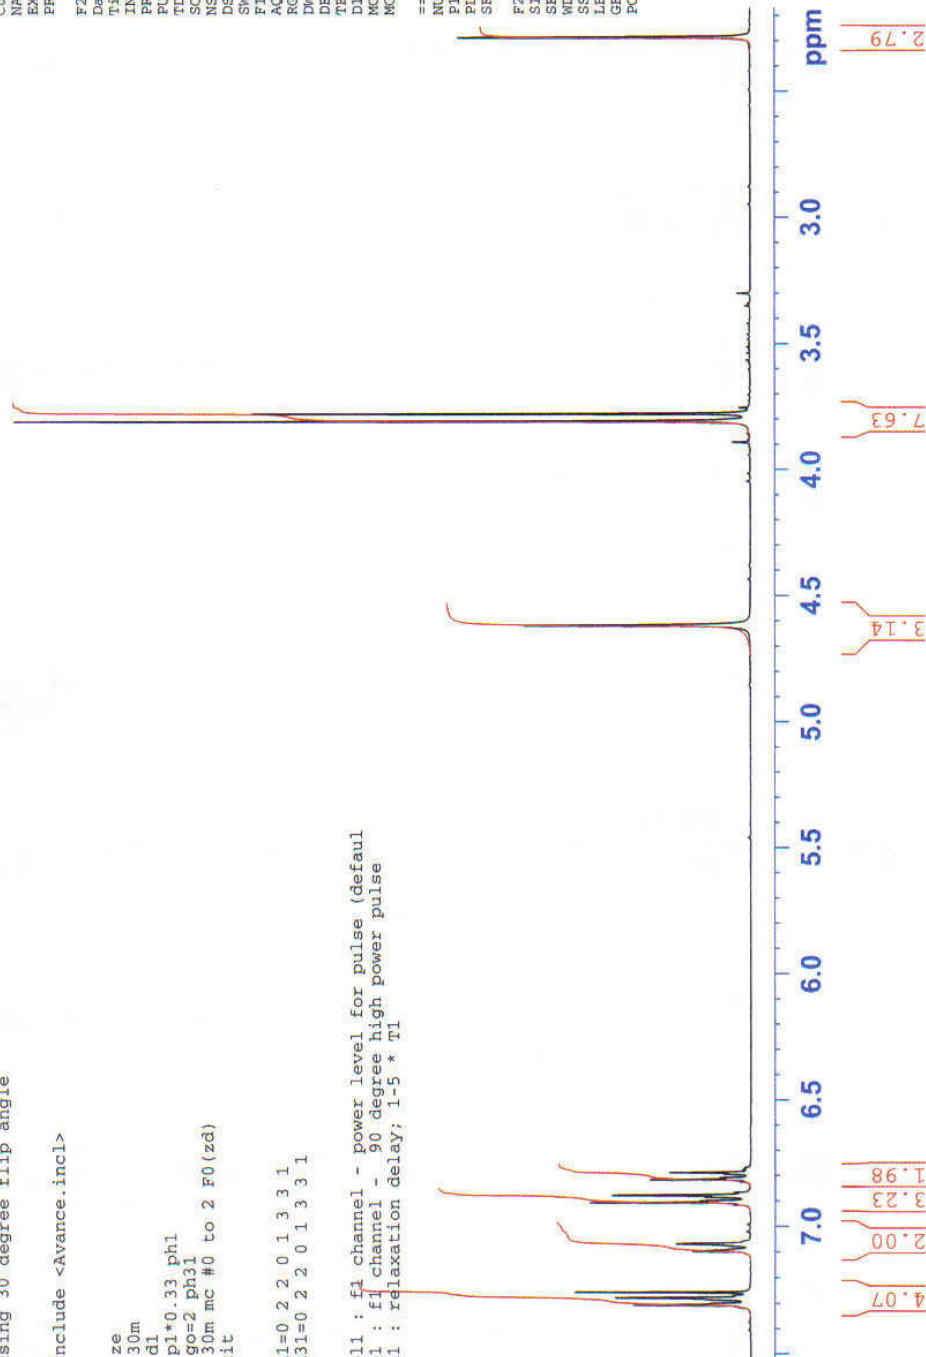

```

;zg30
;advance-version (02/05/31)
;ld sequence
;using 30 degree flip angle

```

```

#include <Avance.incl>

```

```

1 ze
2 30m
d1
p1*0.33 ph1
go=2 ph31
30m mc #0 to 2 F0(zd)
exit

```

```

ph1=0 2 2 0 1 3 3 1
ph31=0 2 2 0 1 3 3 1

```

```

;p11 : f1 channel - power level for pulse (default)
;p1 : f1 channel - 90 degree high power pulse
;d1 : relaxation delay; 1-5 * T1

```

## TABLE 1 ENTRY 5

```

Current Data Parameters
NAME      10376147
EXPNO     10
PROCNO     1

F2 - Acquisition Parameters
Date_     20051125
Time      18.17
INSTRUM   dpx300
PROBHD    5 mm QNP 1H/1
PULPROG   zg30
TD        48848
SOLVENT   CDCL3
DS        64
NS        2
SHH       7183.908 Hz
FIDRES    0.147067 Hz
AQ        3.3998709 sec
RG        456.1
DW        69.600 usec
DE        6.00 usec
TE        299.2 K
D1        6.59999990 sec
MCREST    0.00000000 sec
MCWRK     0.01500000 sec

===== CHANNEL f1 =====
NUC1      1H
P1        9.40 usec
PL1       0.00 dB
SFO1      300.1330010 MHz

F2 - Processing parameters
SI        65536
SF        300.1300077 MHz
WDW       EM
SSB       0
LB        0.30 Hz
GB        0
PC        2.00

```

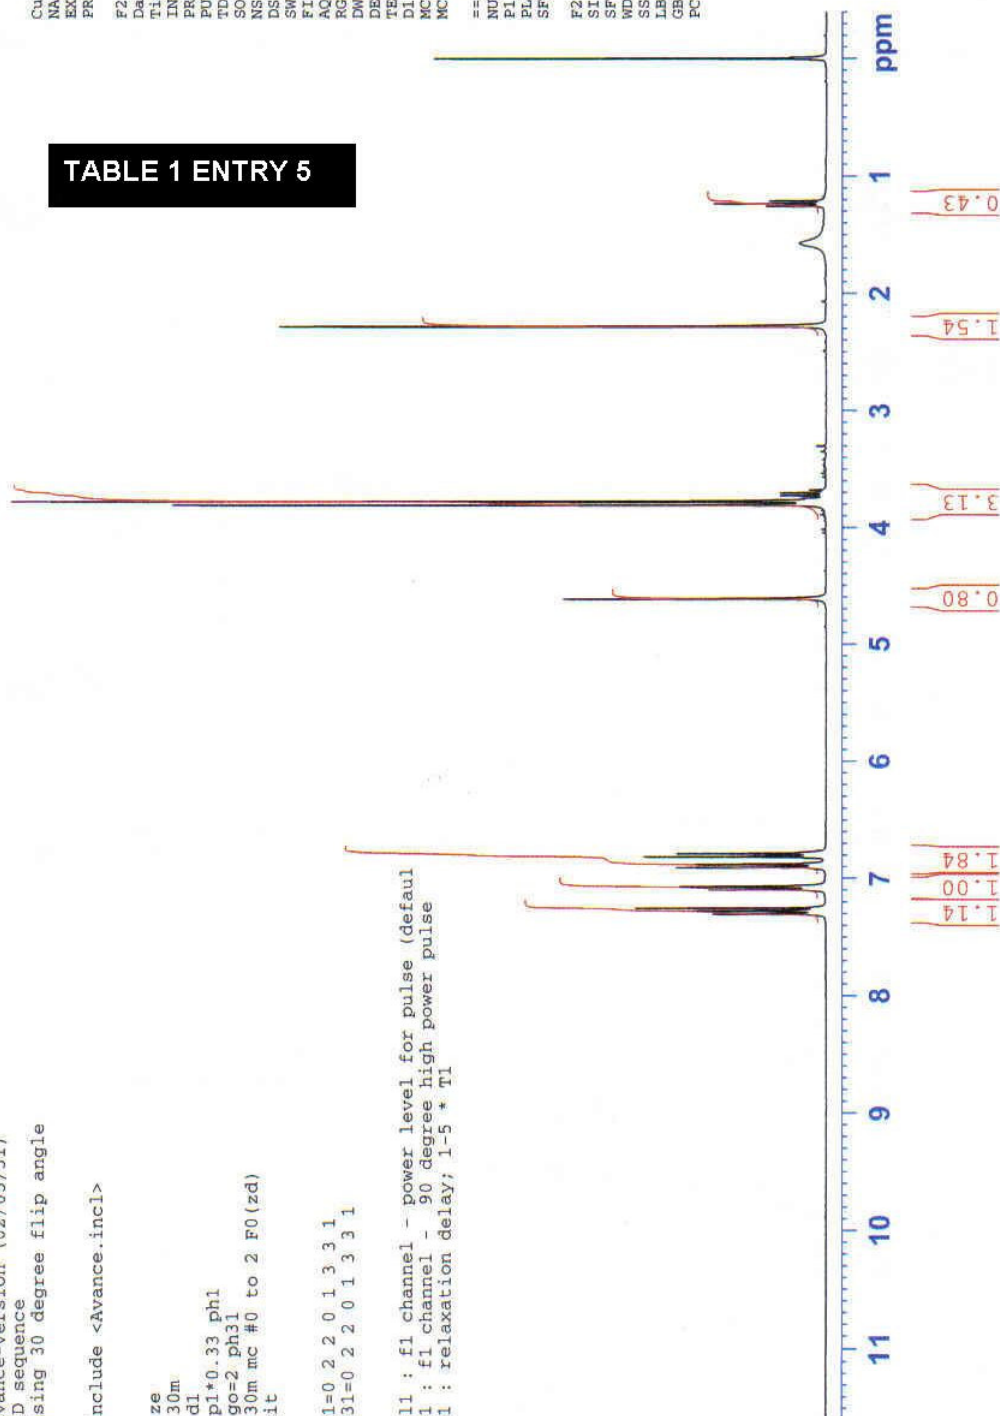

*P. N. S. 2005/11/25*

Current Data Parameters  
NAME 10376147  
EXPNO 10  
PROCNO 1

F2 - Acquisition Parameters  
Date\_ 20051125  
Time 18.17  
INSTRUM dpx300  
PROBHD 5 mm QNP 1H/1  
PULPROG zg30  
TD 48848  
SOLVENT CDCL3  
NS 64  
DS 2  
SWH 7183.908 Hz  
FIDRES 0.147067 Hz  
AQ 3.3998709 sec  
RG 456.1  
DW 69.600 usec  
DE 6.00 usec  
TE 299.2 K  
D1 6.59999990 sec  
MCREST 0.00000000 sec  
MCWFK 0.01500000 sec

===== CHANNEL f1 =====  
NUC1 1H  
P1 9.40 usec  
PL1 0.00 dB  
SFO1 300.1330010 MHz

F2 - Processing parameters  
SI 65536  
SF 300.1300077 MHz  
WDW EM  
SSB 0  
LB 0.30 Hz  
GB 0  
PC 2.00

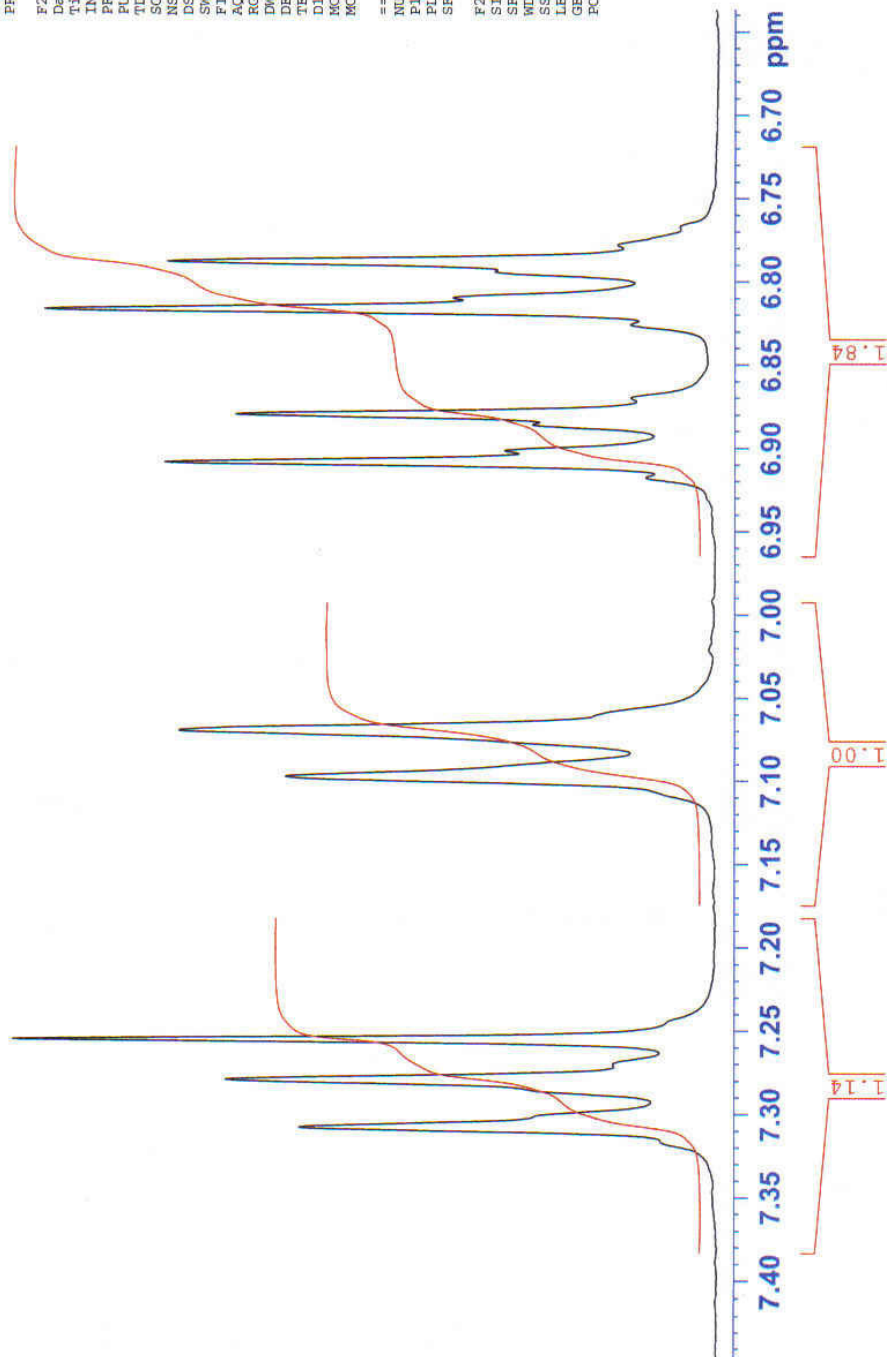

*Q. N. 10/10/05*

Current Data Parameters  
 NAME 10376147  
 EXPNO 10  
 PROCNO 1

F2 - Acquisition Parameters  
 Date\_ 20051125  
 Time 18.17  
 INSTRUM qpx300  
 PROBHD 5 mm QNP 1H/1  
 PULPROG zg30  
 TD 48848  
 SOLVENT CDCL3  
 NS 64  
 DS 2  
 SWH 7183.908 Hz  
 FIDRES 0.147067 Hz  
 AQ 3.3998709 sec  
 RG 456.1  
 DW 69.600 usec  
 DE 6.00 usec  
 TE 299.2 K  
 D1 6.59999990 sec  
 MCREST 0.00000000 sec  
 MCWRR 0.01500000 sec

===== CHANNEL f1 =====  
 NUC1 1H  
 P1 9.40 usec  
 PL1 0.00 dB  
 SF01 300.1330010 MHz

F2 - Processing parameters  
 SI 65536  
 SF 300.1300077 MHz  
 EM 0  
 SSB 0  
 LB 0.30 Hz  
 GB 0  
 PC 2.00

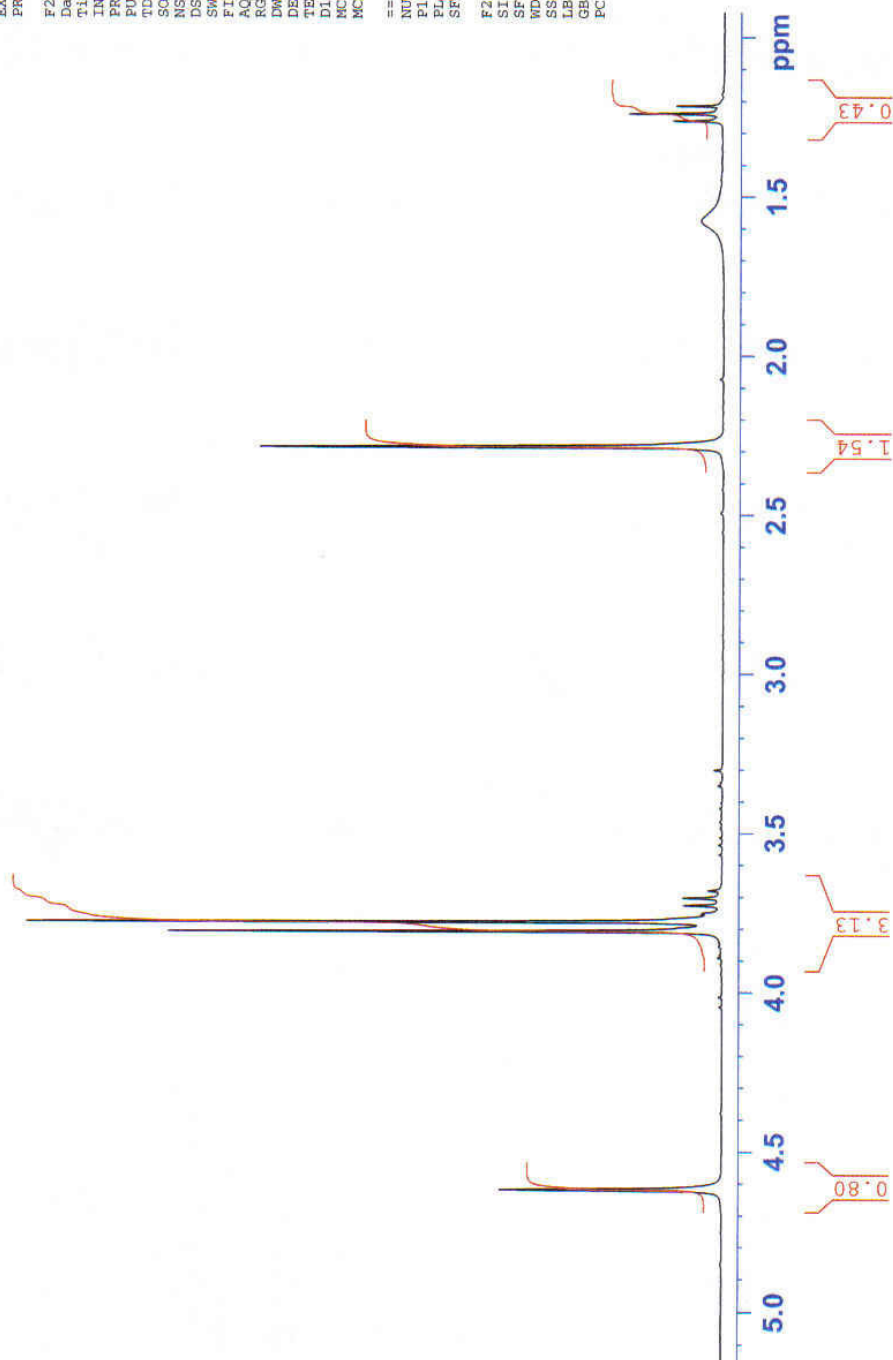

*D. Nutt*  
 20/11/05



```
;zg30
;advance-version (02/05/31)
;ID sequence
;using 30 degree flip angle
```

```
#include <Avance.incl>
```

```
1 ze
2 30m
d1
p1*0.33 ph1
go=2 ph31
30m mc #0 to 2 F0(zd)
exit
```

```
ph1=0 2 2 0 1 3 3 1
ph31=0 2 2 0 1 3 3 1
```

```
;p11 : f1 channel - power level for pulse (default)
;p1 : f1 channel - 90 degree high power pulse
;d1 : relaxation delay; 1-5 * T1
```

TABLE 1 ENTRY 6

```
Current Data Parameters
NAME      10371786
EXPNO     10
PROCNO     1

F2 - Acquisition Parameters
Date_      20050819
Time       18.34
INSTRUM    dpx300
PROBHD     5 mm QNP 1H/1
PULPROG    zg30
TD          48848
SOLVENT    CDCL3
NS          64
DS          2
SWH         7183.908 Hz
FIDRES     0.147067 Hz
AQ          3.3998709 sec
RG          645.1
DW          69.600 usec
DE          6.00 usec
TE          299.2 K
D1          6.59999990 sec
MCREST     0.00000000 sec
MCWRK      0.01500000 sec

===== CHANNEL f1 =====
NUC1       1H
P1          9.40 usec
PL1         0.00 dB
SFO1       300.1330010 MHz

F2 - Processing parameters
SI          65536
SF          300.13300064 MHz
WDW         EM
SSB         0
LB          0.30 Hz
GB          0
PC          2.00
```

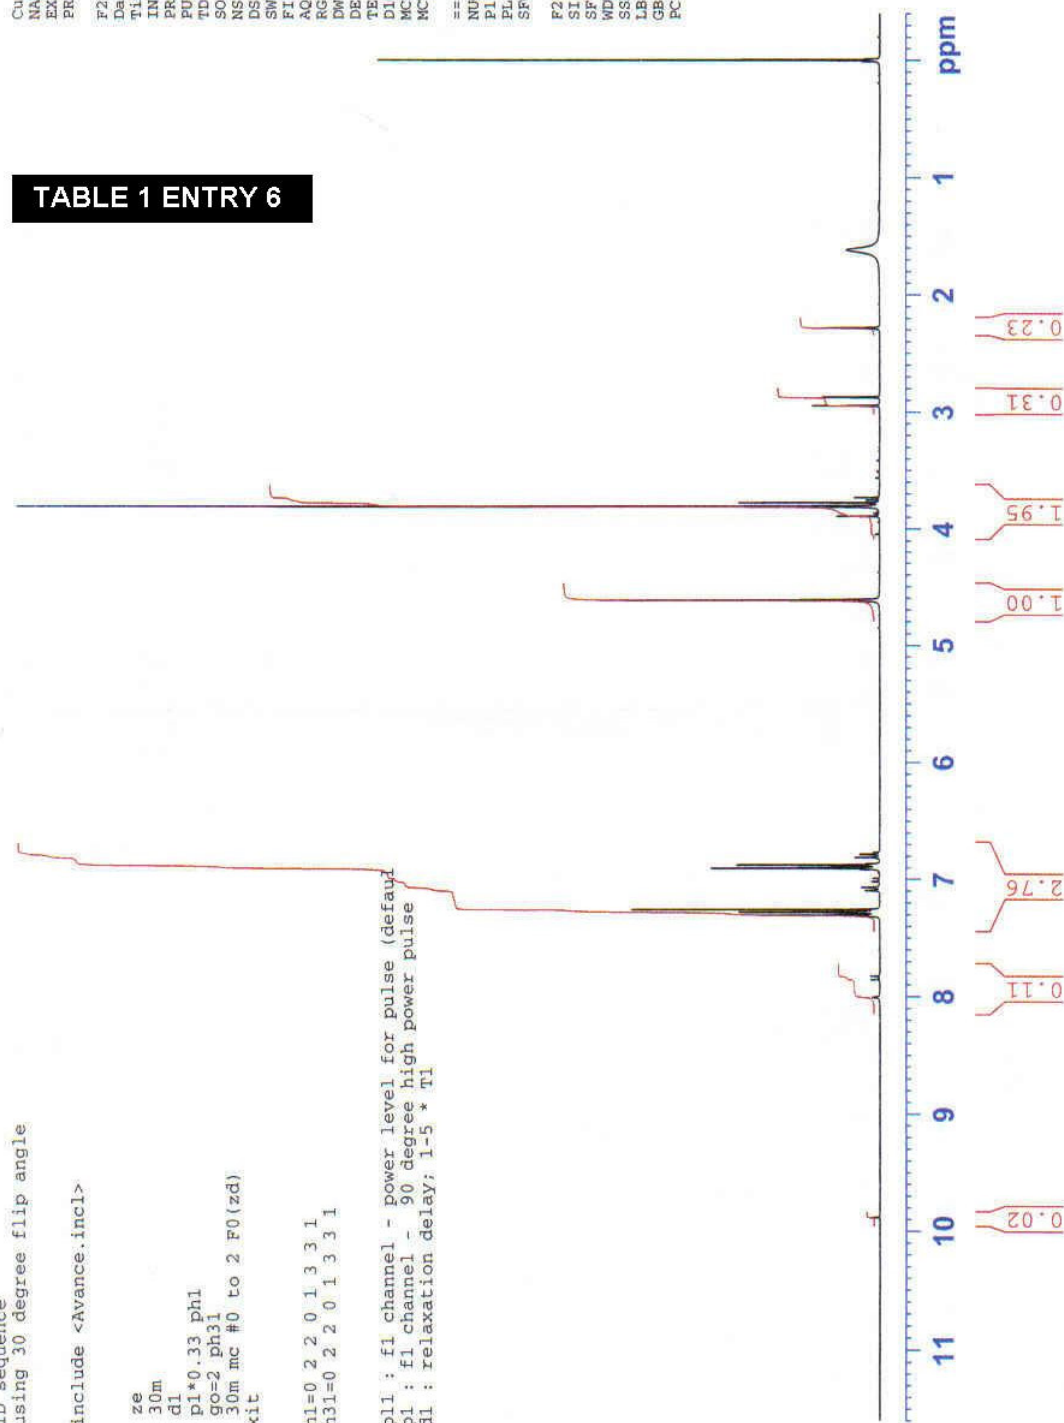

*J. Nut*  
22/8/05



Current Data Parameters  
 NAME 10371786  
 EXPNO 10  
 PROCNO 1

F2 - Acquisition Parameters  
 Date\_ 20050819  
 Time 18.34  
 INSTRUM dpx300  
 PROBHD 5 mm QNP 1H/1  
 PULPROG zgpg30  
 TD 65536  
 ID 48848  
 SOLVENT CDCL3  
 NS 64  
 DS 2  
 SWH 7183.908 Hz  
 FIDRES 0.147067 Hz  
 AQ 3.3998709 sec  
 RG 645.1  
 DW 69.600 usec  
 DE 6.00 usec  
 TE 299.2 K  
 D1 6.59999990 sec  
 MCREST 0.00000000 sec  
 MCWPK 0.01500000 sec

===== CHANNEL f1 =====  
 NUC1 1H  
 P1 9.40 usec  
 PL1 0.00 dB  
 SFO1 300.1330010 MHz

F2 - Processing parameters  
 SI 65536  
 SF 300.1300064 MHz  
 WDW EM  
 SSB 0  
 LB 0.30 Hz  
 GB 0  
 PC 2.00

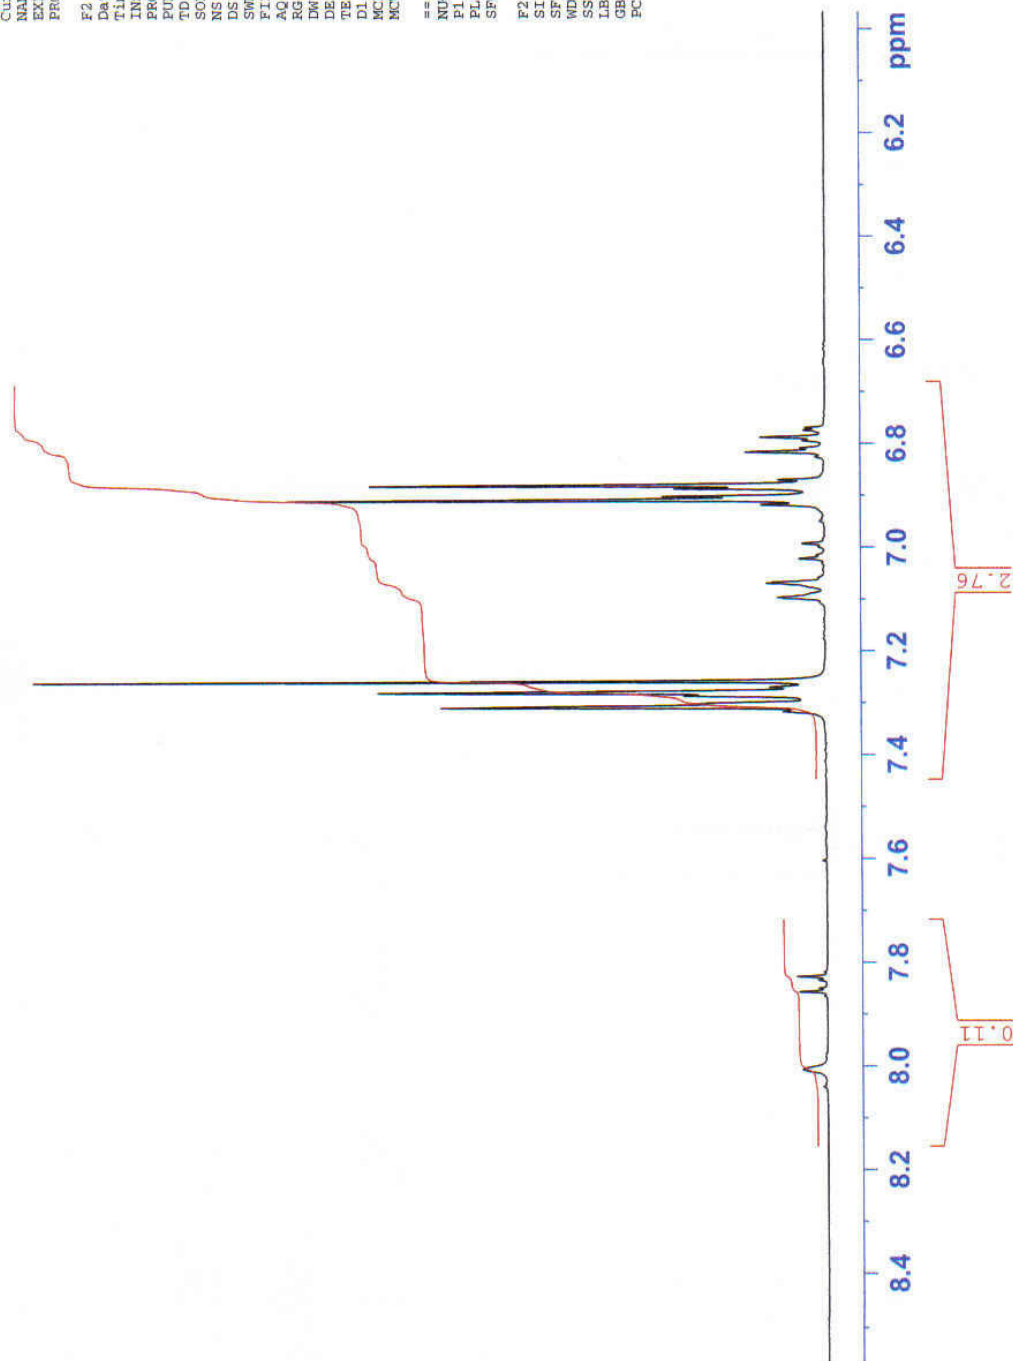

*D. N. N. N.*  
 22/8/05

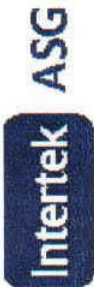

```
;zg30
;advance-version (02/05/31)
;1d sequence
;using 30 degree flip angle
```

```
#include <Avance.incl>
```

```
1 ze
2 30m
d1
p1*0.33 ph1
go=2 ph31
30m mc #0 to 2 F0(zd)
exit

ph1=0 2 2 0 1 3 3 1
ph31=0 2 2 0 1 3 3 1
```

```
;p11 : f1 channel - power level for pulse (default)
;p1 : f1 channel - 90 degree high power pulse
;d1 : relaxation delay; 1-5 * T1
```

TABLE 1 ENTRY 7

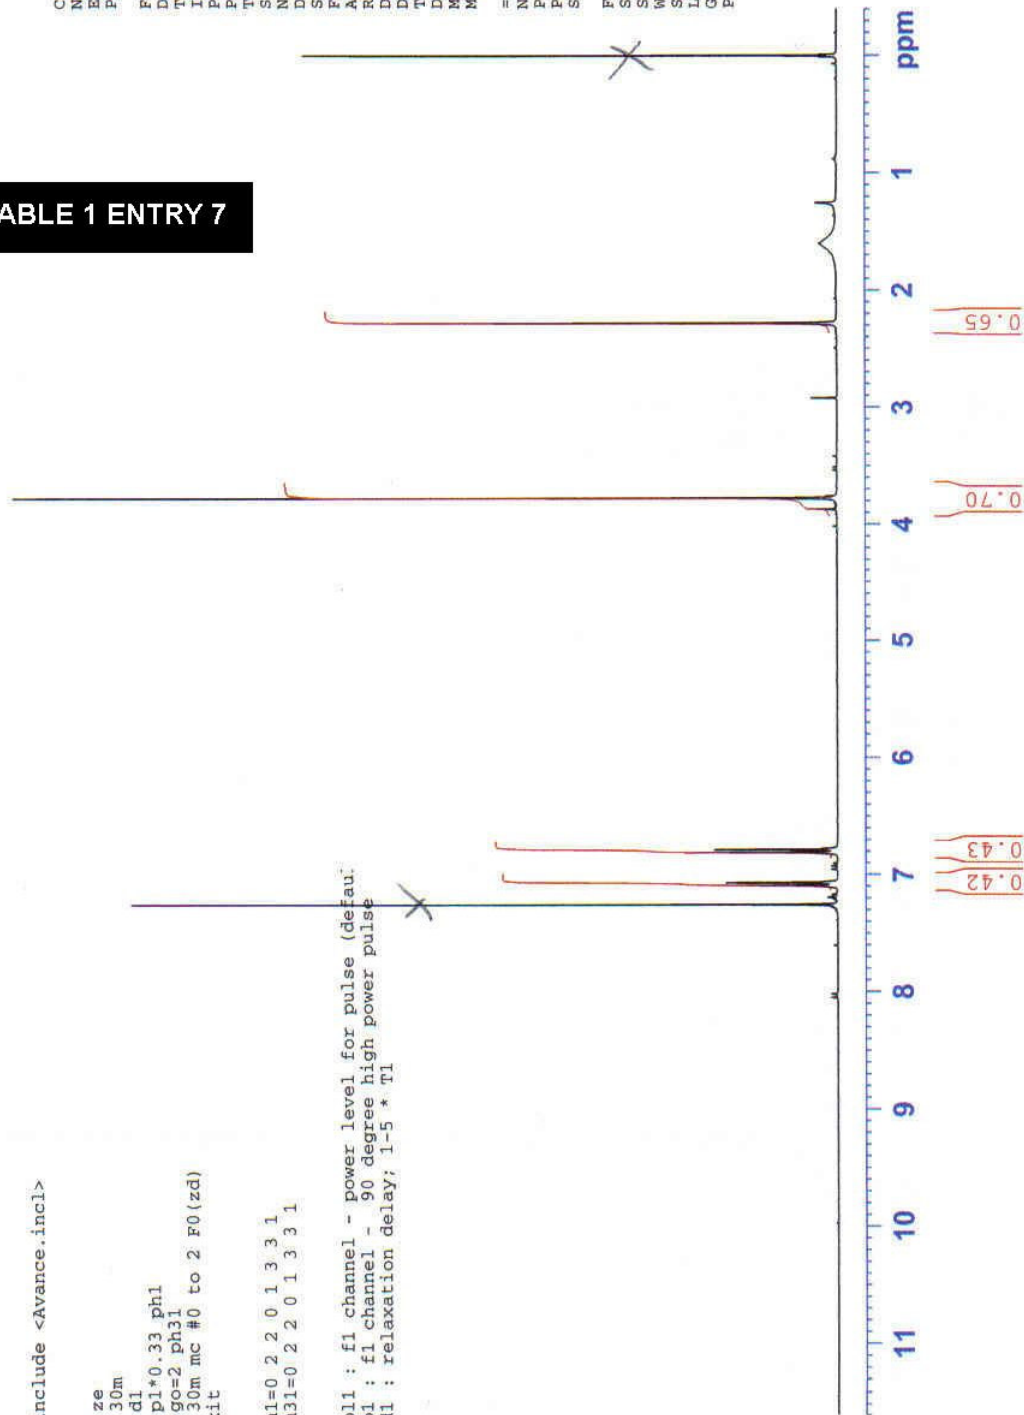

```
Current Data Parameters
NAME 10368723
EXPNO 10
PROCNO 1

F2 - Acquisition Parameters
Date_ 20050609
Time 14.46
INSTRUM qnp300
PROBHD 5 mm QNP 1H/1
PULPROG zg30
TD 48848
SOLVENT CDCL3
NS 64
DS 2
SWH 7183.908 Hz
FIDRES 0.147067 Hz
AQ 3.3988709 sec
RG 1290.2
DE 63.600 usec
TE 299.2 K
DI 6.59999990 sec
MCREST 0.00000000 sec
MCWRK 0.01500000 sec

===== CHANNEL f1 =====
NUC1 1H
P1 9.40 usec
PL1 0.00 dB
SFO1 300.1330010 MHz

F2 - Processing parameters
SI 65536
SF 300.1300066 MHz
WDW EM
SSB 0
LB 0.30 Hz
GB 0
PC 2.00
```

*D. Mout*  
*10/6/05*

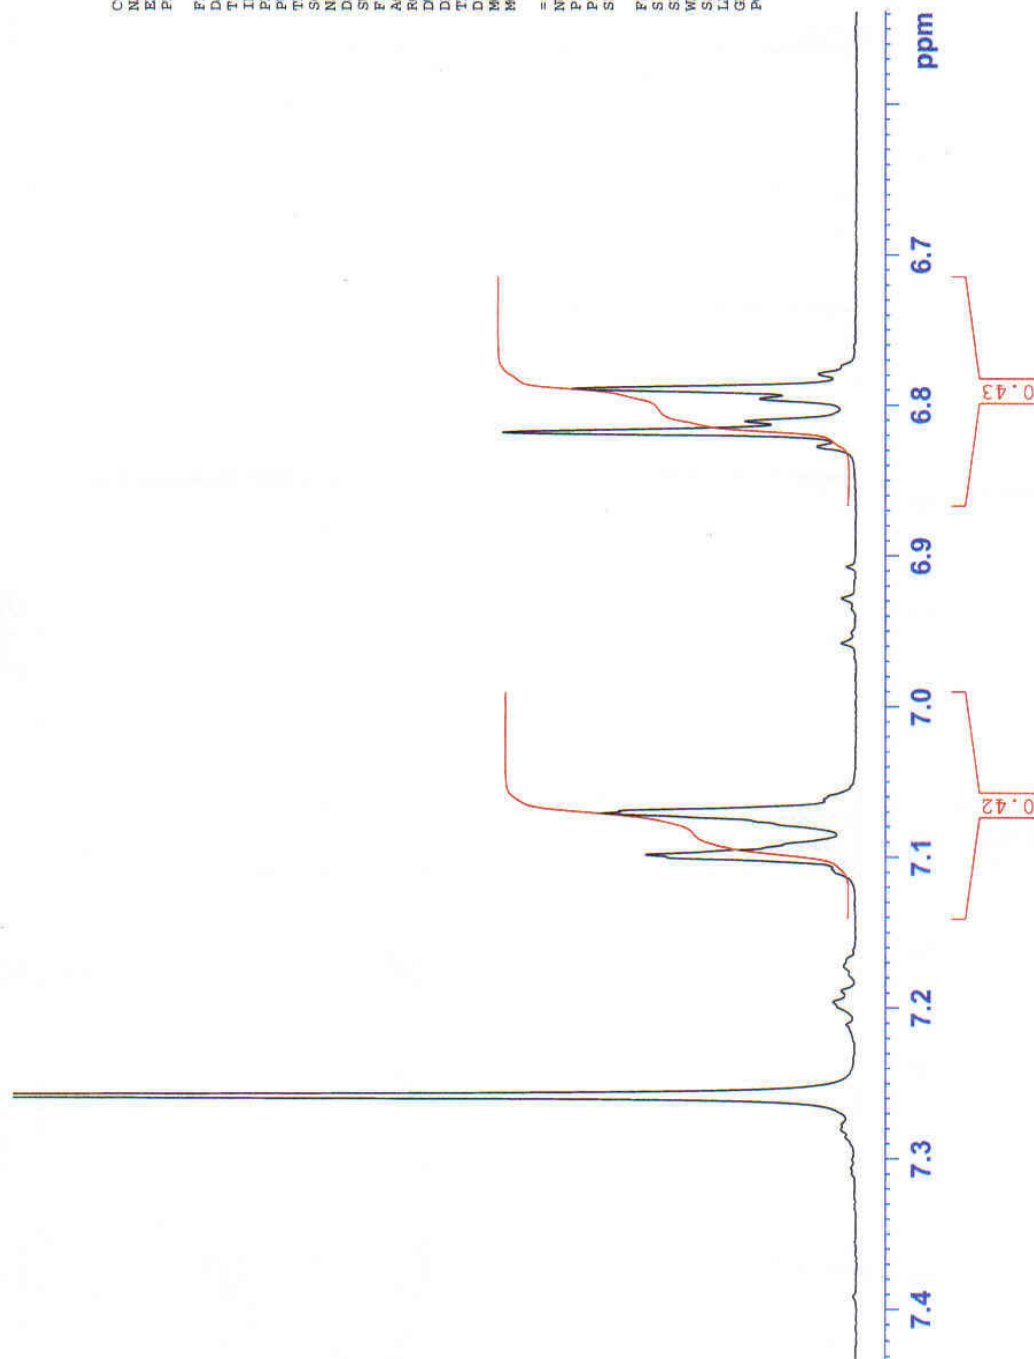

Current Data Parameters  
NAME 10368723  
EXPNO 10  
PROCNO 1

F2 - Acquisition Parameters  
Date\_ 20050609  
Time 14.46  
INSTRUM dpx300  
PROBHD 5 mm QNP 1H/1  
PULPROG zg30  
TD 48848  
SOLVENT CDCl<sub>3</sub>  
NS 64  
DS 2  
SWH 7183.908 Hz  
FIDRES 0.147067 Hz  
AQ 3.3998709 sec  
RG 1290.2  
DW 69.600 usec  
DE 6.00 usec  
TE 299.2 K  
D1 6.59999990 sec  
MCREST 0.00000000 sec  
MCWRK 0.01500000 sec

===== CHANNEL f1 =====  
NUC1 1H  
P1 9.40 usec  
PL1 0.00 dB  
SFO1 300.1330010 MHz

F2 - Processing parameters  
SI 65536  
SF 300.1300066 MHz  
WDW EM  
SSB 0  
LB 0.30 Hz  
GB 0  
PC 2.00

*J. N. N. N.*  
*10/6/05*

```

;zg30
;advance-version (02/05/31)
;1d sequence
;using 30 degree flip angle

```

```

#include <h1vance.incl>

```

```

1 ze
2 30m
d1
p1*0.33 ph1
go=2 ph31
30m mc #0 to 2 F0(zd)
exit

```

```

ph1=0 2 2 0 1 3 3 1
ph31=0 2 2 0 1 3 3 1

```

```

;p1 : f1 channel - power level for pulse (default)
;pl : f1 channel - 90 degree high power pulse
;dl : relaxation delay; 1-5 * T1

```

TABLE 1 ENTRY 8

```

Current Data Parameters
NAME      10371787
EXPNO     10
PROCNO    1

F2 - Acquisition Parameters
Date_     20050819
Time      18:51
INSTRUM   gpx300
PROBHD    5 mm QNP 1H/1
PULPROG   zg30
TD         48848
SOLVENT   CDCl3
NS         64
DS         2
SWH        7183.908 Hz
FIDRES     0.147067 Hz
AQ         3.3998709 sec
RG         512
DE         69.600 usec
TE         299.2 K
D1         6.59999990 sec
MCPRST     0.00000000 sec
MCWRK     0.01500000 sec

===== CHANNEL f1 =====
NUC1       1H
P1         9.40 usec
PL1        0.00 dB
SFO1       300.1330010 MHz

F2 - Processing parameters
SI         65536
SF         300.1300078 MHz
WDW        EM
SSB        0
LB         0.30 Hz
GB         0
PC         2.00

```

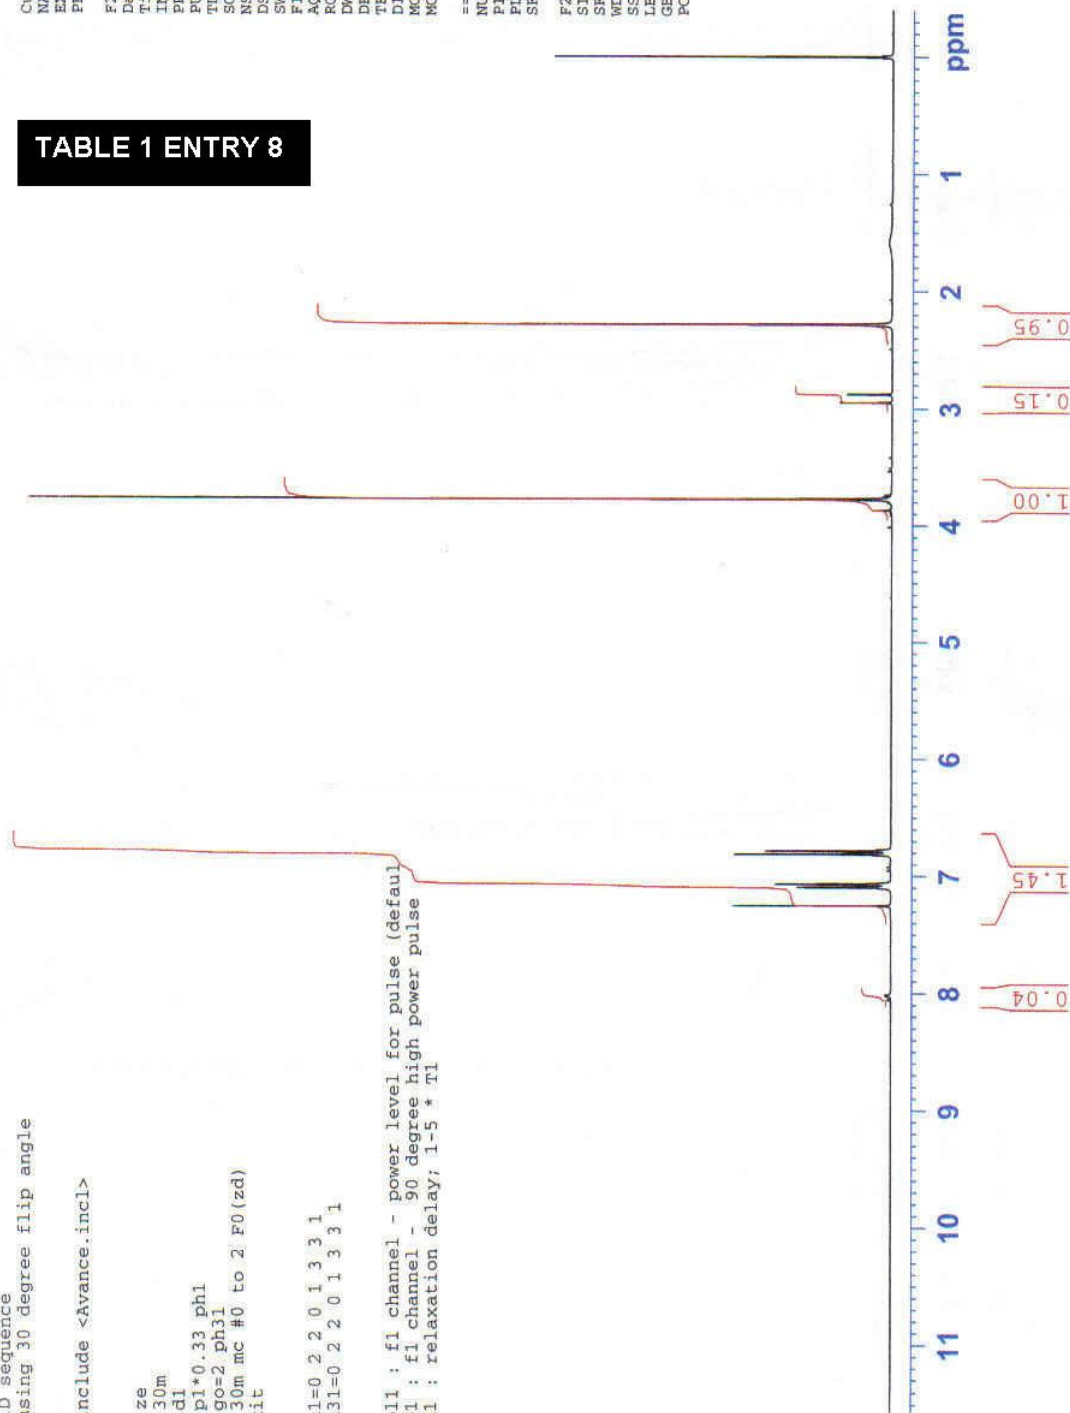

*P. Nut*  
22/8/05

Current Data Parameters  
 NAME 10371787  
 EXPNO 10  
 PROCNO 1

F2 - Acquisition Parameters  
 Date\_ 20050819  
 Time\_ 18:51  
 INSTRUM dpx300  
 PROBD 5 mm QNP 1H/1  
 PULPROG zg30  
 TD 48848  
 SOLVENT CDCL3  
 NS 64  
 DS 2  
 SWH 7183.908 Hz  
 FIDRES 0.147067 Hz  
 AQ 3.3998709 sec  
 RG 32  
 DE 69.600 usec  
 TE 299.2 K  
 DI 6.5999990 sec  
 MCREST 0.0000000 sec  
 MCWRR 0.0150000 sec

===== CHANNEL f1 =====  
 NUC1 1H  
 P1 9.40 usec  
 PL1 0.00 dB  
 SFO1 300.1330010 MHz

F2 - Processing parameters  
 SI 65536  
 SF 300.1300078 MHz  
 EX  
 WDW 0  
 SSB 0.30 Hz  
 LB 0  
 GB 0  
 PC 2.00

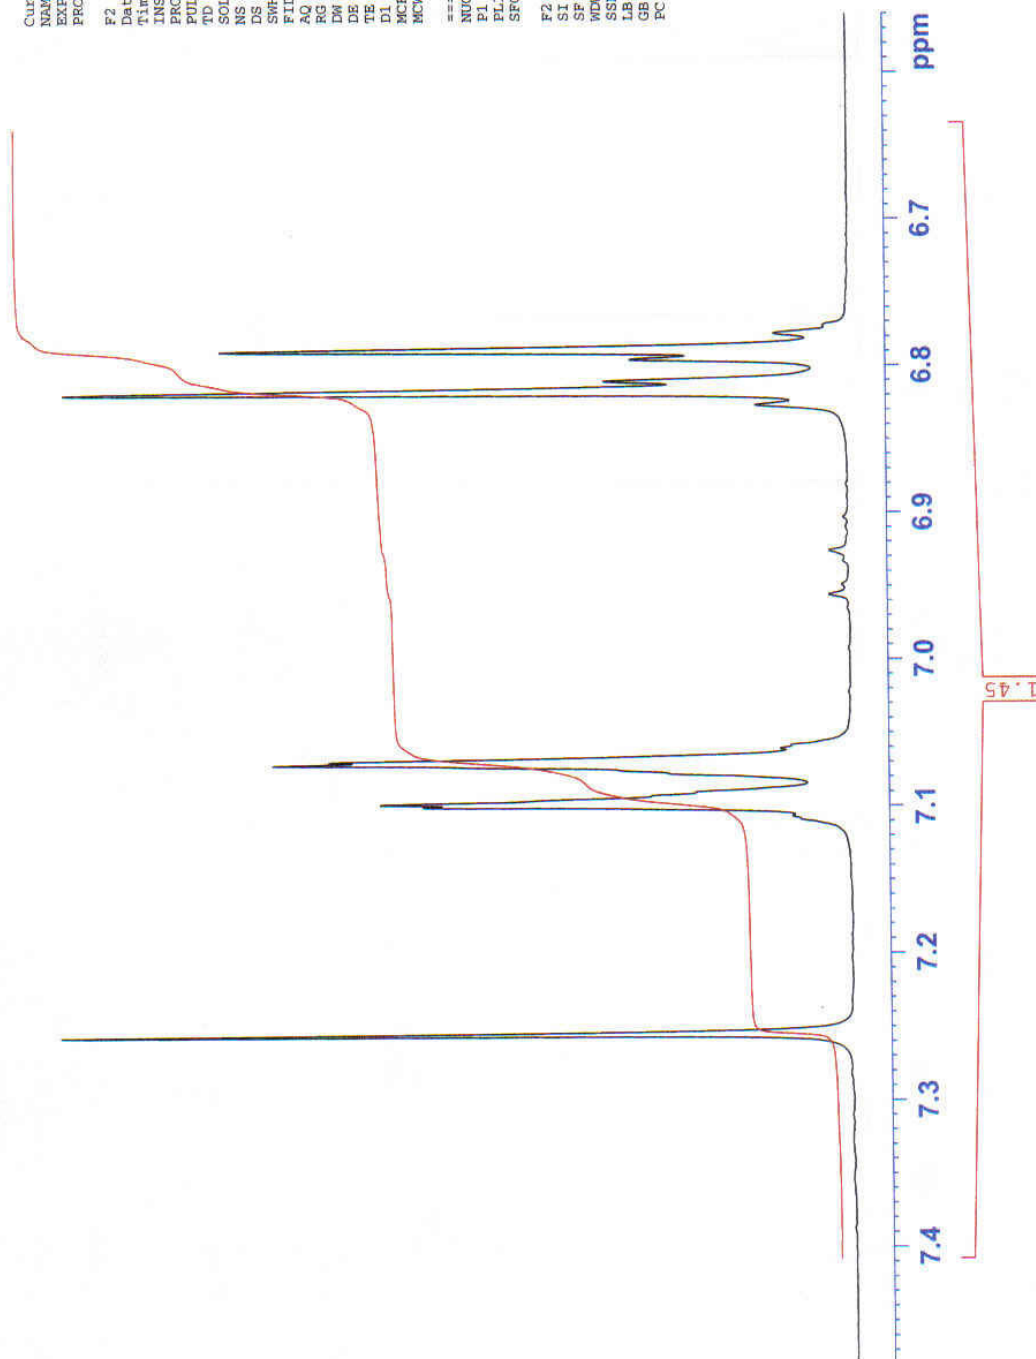

*P. N. N. N.*  
 22/8/07

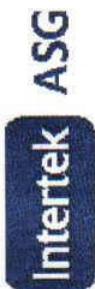

```
;zg30
;advance-version (02/05/31)
;1D sequence
;using 30 degree flip angle
```

```
#include <Avance.incl>
```

```
1 ze
2 30m
d1
p1*0.33 ph1
go=2 ph31
30m mc #0 to 2 F0(zd)
exit
```

```
ph1=0 2 2 0 1 3 3 1
ph31=0 2 2 0 1 3 3 1
```

```
;p1 : f1 channel - power level for pulse (default)
;p1 : f1 channel - 90 degree high power pulse
;d1 : relaxation delay; 1-5 * T1
```

TABLE 1 ENTRY 9

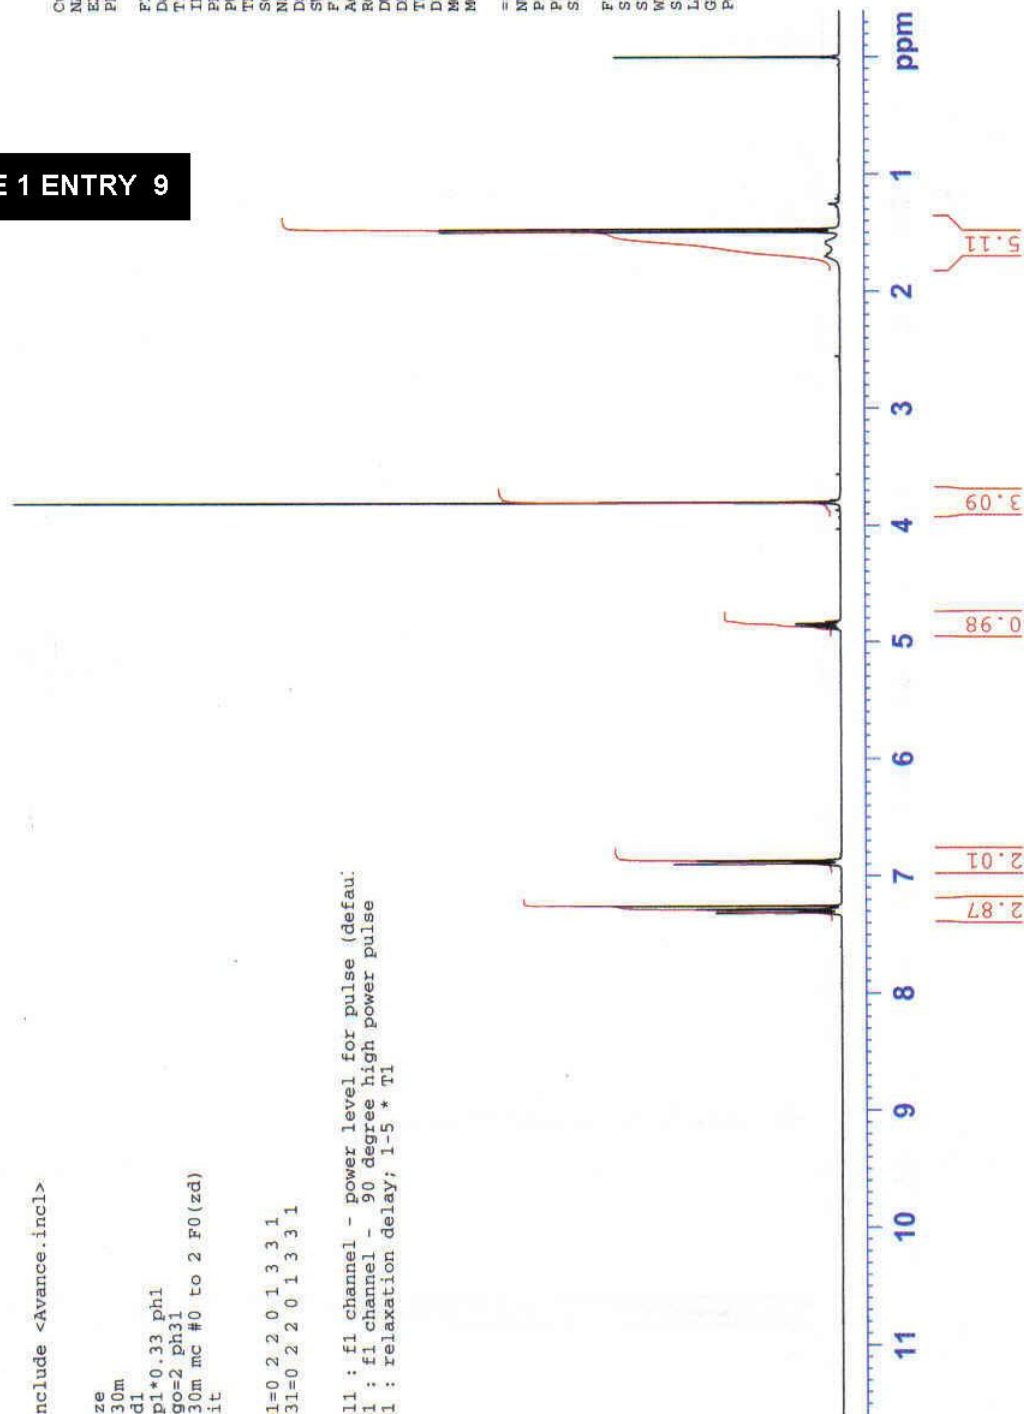

```
Current Data Parameters
NAME 10368721
EXPNO 10
PROCNO 1

F2 - Acquisition Parameters
Date_ 20050609
Time 14.12
INSTRUM qnp300
PROBHD 5 mm QNP 1H/1
PULPROG zg30
TD 48848
SOLVENT CDCl3
NS 64
DS 2
SWH 7183.908 Hz
AQ 0.147067 Hz
RG 3.3998709 sec
FIDRES 724.1
DE 69.600 usec
TE 299.2 K
D1 6.59999990 sec
MCREST 0.00000000 sec
MCWRK 0.01500000 sec

===== CHANNEL f1 =====
NUC1 1H
P1 9.40 usec
PL1 0.00 dB
SFO1 300.1330010 MHz

F2 - Processing parameters
SI 65536
SF 300.1300085 MHz
WDW EM
SSB 0
LB 0.30 Hz
GB 0
PC 2.00
```

D. Nurb  
10/6/05



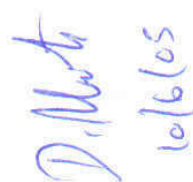

10383512, RX0002/40A, BRUKER DPX300, QNP, H1 SPECTRUM, SOLV:- CDCl3/TMS

```
;zg30
;avance-version (02/05/31)
;1d sequence
;using 30 degree flip angle
```

```
#include <Avance.incl>
```

```
1 ze
2 30m
d1
p1*0.33 ph1
go=2 ph31
30m mc #0 to 2 F0(zd)
exit
```

```
ph1=0 2 2 0 1 3 3 1
ph31=0 2 2 0 1 3 3 1
```

```
;p1 : f1 channel - power leve
;p1 : f1 channel - 90 degree
;dl : relaxation delay; 1-5 *
```

# TABLE 2 ENTRY 1

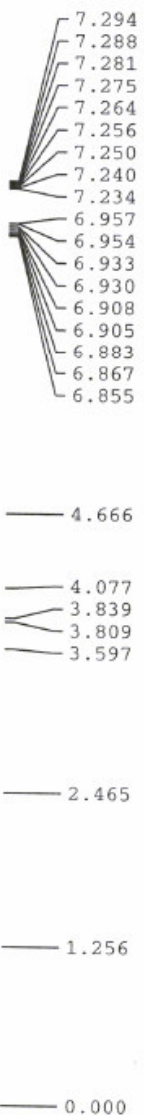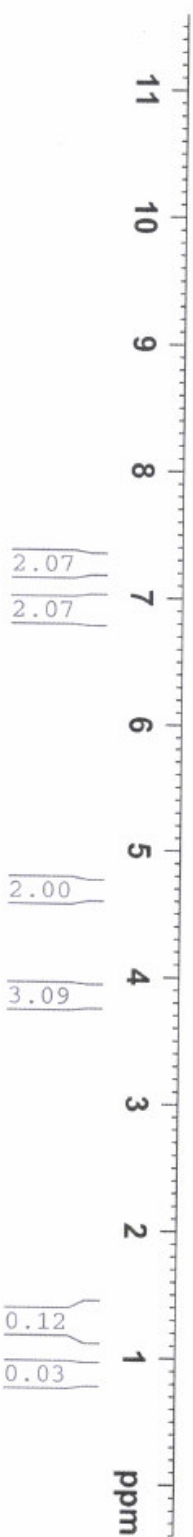

Intertek ASG

Current Data Parameters  
NAME 10383512  
EXPNO 10  
PROCNO 1

F2 - Acquisition Parameters  
Date\_ 20060713  
Time 12.01  
INSTRUM dpx300  
PROBHD 5 mm QNP 1H/13  
PULPROG zg30  
TD 48848  
SOLVENT CDCl3  
NS 64  
DS 2  
SWH 7183.908 Hz  
FIDRES 0.147067 Hz  
AQ 3.398709 sec  
RG 101.6  
DW 69.600 usec  
DE 6.00 usec  
TE 299.2 K  
D1 6.59999990 sec  
MCREST 0.00000000 sec  
MCPRK 0.01500000 sec

===== CHANNEL f1 =====  
NUC1 1H  
P1 9.40 usec  
PL1 0.00 dB  
SFO1 300.1330010 MHz  
F2 - Processing Parameters  
SI 65536  
SF 300.1300116 MHz  
WDW EM  
SSB 0  
LB 0.30 Hz  
GB 0  
PC 300.00

S.N. 131710e

10383512, RX0002/40A, BRUKER DPX300, QNP, H1 SPECTRUM, SOLV:- CDCl3/TMS

```

;zg30
;advance-version (02/05/31)
;1D sequence
;using 30 degree flip angle
7.294
7.288
7.281
7.275
7.264
7.256
7.250
7.240
7.234
9.957
9.954
9.933
9.930
9.908
9.905
9.883
9.867
9.855

```

#include <Avance.incl>

```

1 ze
2 30m
d1
p1*0.33 p1
go=2 ph31
30m mc #0 to 2 F0(zd)
exit

```

```

p1=0 2 2 0 1 3 3 1
ph31=0 2 2 0 1 3 3 1

```

```

;p1 : f1 channel - power level
;p1 : f1 channel - 90 degree
;dl : relaxation delay; 1-5 *

```

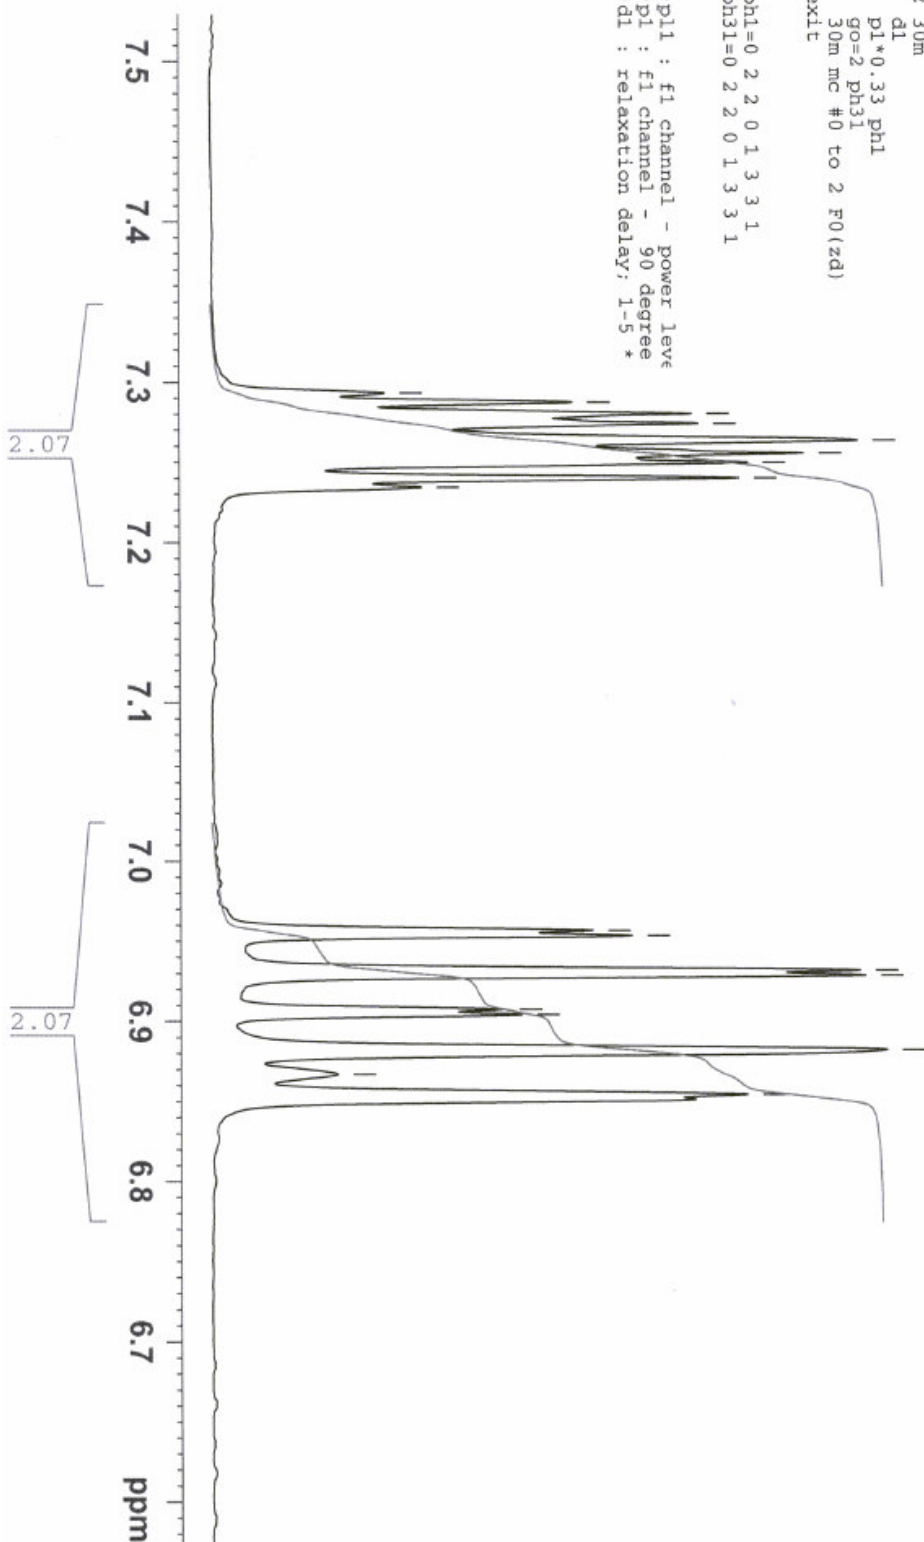

**Intertek ASG**

Current Data Parameters  
NAME 10383512  
EXPNO 10  
PROCNO 1

F2 - Acquisition Parameters  
Date\_ 20060713  
Time 12.01

INSTRUM dpx300  
PROBHD 5 mm QNP 1H/13  
PULPROG zg30  
TD 48848  
SOLVENT CDCl3  
NS 64

DS 2  
SWH 7183.908 Hz  
FIDRES 0.147067 Hz  
AQ 3.398709 sec  
RG 101.6  
DM 69.600 usec  
DE 6.00 usec  
TE 299.2 K  
D1 6.59999990 sec  
MCREST 0.00000000 sec  
MCPRK 0.01500000 sec

===== CHANNEL f1 =====  
NUC1 1H  
P1 9.40 usec  
PL1 0.00 dB  
SFO1 300.1330010 MHz

F2 - Processing Parameters  
SI 65536  
SF 300.1300116 MHz  
WDW EM  
SSB 0  
LB 0.30 Hz  
GB 0  
PC 300.00

S. 131710a

10383512, RX0002/40A, BRUKER DPX300, QNP, H1 SPECTRUM, SOLV;- CDCl3/TMS

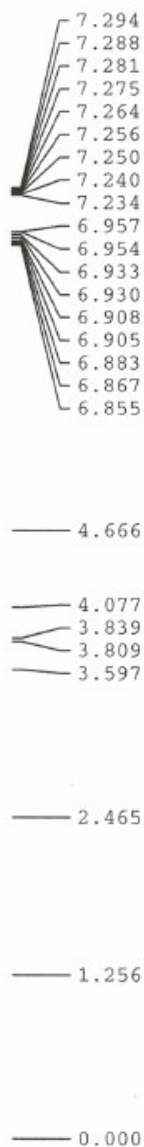

#include <Avance.incl>

```
1 ze
2 30m
d1
p1*0.33 ph1
go=2 ph31
30m mc #0 to 2 F0(zd)
exit
```

```
ph1=0 2 2 0 1 3 3 1
ph31=0 2 2 0 1 3 3 1
```

```
;p1 : f1 channel - power leve
;p1 : f1 channel - 90 degree
;d1 : relaxation delay; 1-5 *
```

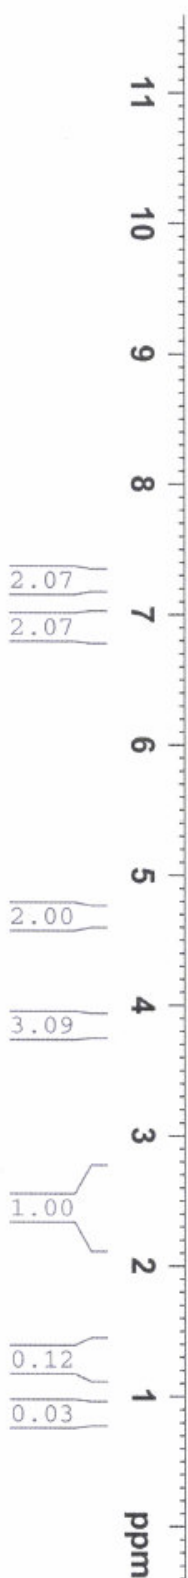

**Intertek ASG**

Current Data Parameters  
NAME 10383512  
EXPNO 10  
PROCNO 1

F2 - Acquisition Parameters  
Date\_ 20060713  
Time 12.01  
INSTRUM dpx300  
PROBHD 5 mm QNP 1H/13  
PULPROG zg30  
TD 48848  
SOLVENT CDCl3  
NS 64  
DS 2  
SWH 7183.908 Hz  
FIDRES 0.147067 Hz  
AQ 3.398709 sec  
RG 101.6  
DM 69.600 usec  
DE 6.00 usec  
TE 299.2 K  
D1 6.59999990 sec  
MCREST 0.00000000 sec  
MCWRK 0.01500000 sec

===== CHANNEL f1 =====  
NUC1 1H  
P1 9.40 usec  
PL1 0.00 dB  
SFO1 300.1330010 MHz  
F2 - Processing parameters  
SI 65536  
SF 300.1300116 MHz  
WDW EM  
SSB 0  
LB 0.30 Hz  
GB 0  
PC 300.00

*Handwritten signature and date:*  
20/7/06

**Intertek ASG**

```
;zg30
;avance-version (02/05/31)
;ID sequence
;using 30 degree flip angle
#include <Avance.incl>
```

```
1 ze
2 30m
d1
p1*0.33 ph1
go=2 ph31
30m mc #0 to 2 F0(zd)
exit
```

```
ph1=0 2 2 0 1 3 3 1
ph31=0 2 2 0 1 3 3 1
```

```
;p1 : f1 channel - power leve
;p1 : f1 channel - 90 degree
;d1 : relaxation delay; 1-5 *
```

**TABLE 2 ENTRY 2**

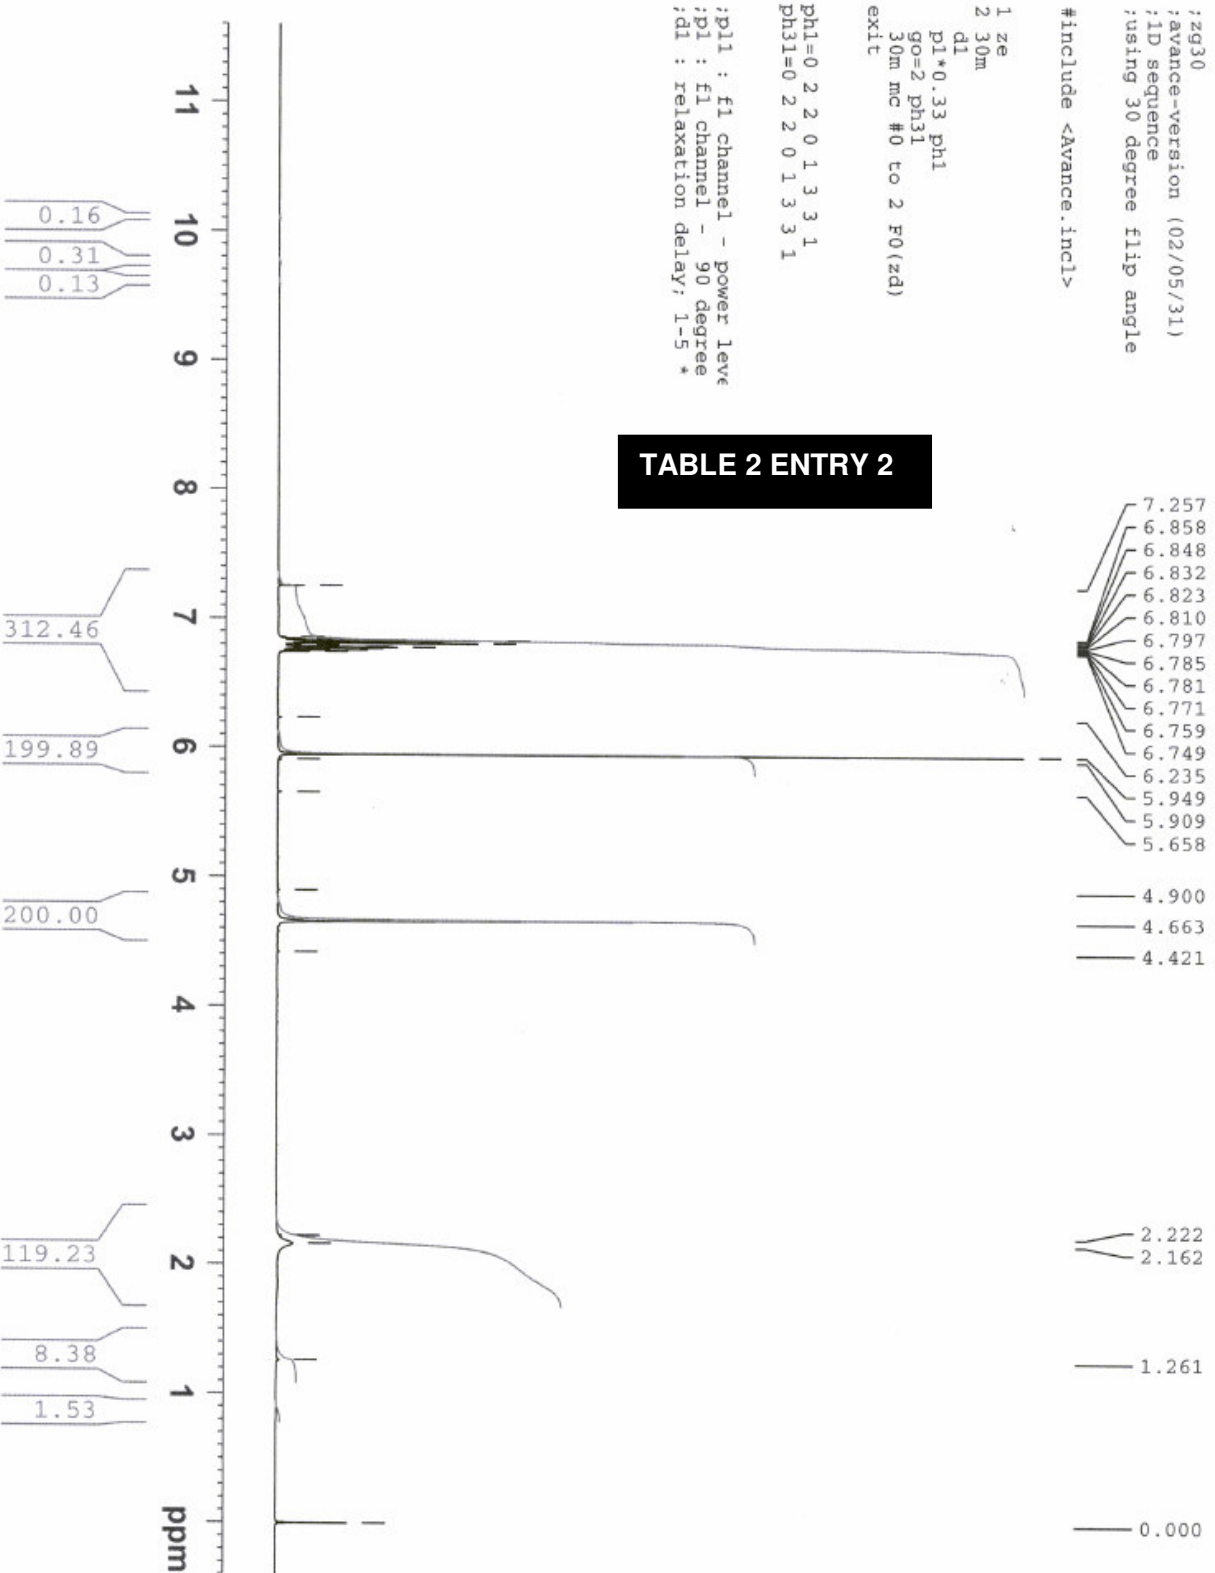

Current Data Parameters  
NAME 10383516  
EXPNO 10  
PROCNO 1

F2 - Acquisition Parameters  
Date\_ 20060713  
Time 12.54  
INSTRUM dpx300  
PROBHD 5 mm QNP 1H/13  
PULPROG zg30  
TD 48848  
SOLVENT CDC13  
NS 64  
DS 2  
SWH 7183.908 Hz  
FIDRES 0.147067 Hz  
AQ 3.3998709 sec  
RG 128  
DM 69.600 usec  
DE 6.00 usec  
TE 299.2 K  
D1 6.59999990 sec  
MCREST 0.00000000 sec  
MCWRK 0.01500000 sec

===== CHANNEL f1 =====  
NUC1 1H  
P1 9.40 usec  
PL1 0.00 dB  
SFO1 300.1330010 MHz  
F2 - Processing parameters  
SI 65536  
SF 300.1300070 MHz  
WDW EM  
SSB 0  
LB 0.30 Hz  
GB 0  
PC 100.00

S.v  
1317/100



10383614, RX0002/42A, BRUKER DPX300, QNP, H1 SPECTRUM, SOLV:-CDCL3/TMS

**Intertek ASG**

```
;zg30
;advance-version (02/05/31)
;ID sequence
;using 30 degree flip angle
#include <Avance.incl>
```

```
1 ze
2 30m
d1
p1*0.33 ph1
go=2 ph31
30m mc #0 to 2 F0(zd)
exit
```

```
ph1=0 2 2 0 1 3 3 1
ph31=0 2 2 0 1 3 3 1
```

```
;p1 : f1 channel - power leve
;p1 : f1 channel - 90 degree
;dl : relaxation delay; 1-5 *
```

### TABLE 2 ENTRY 3

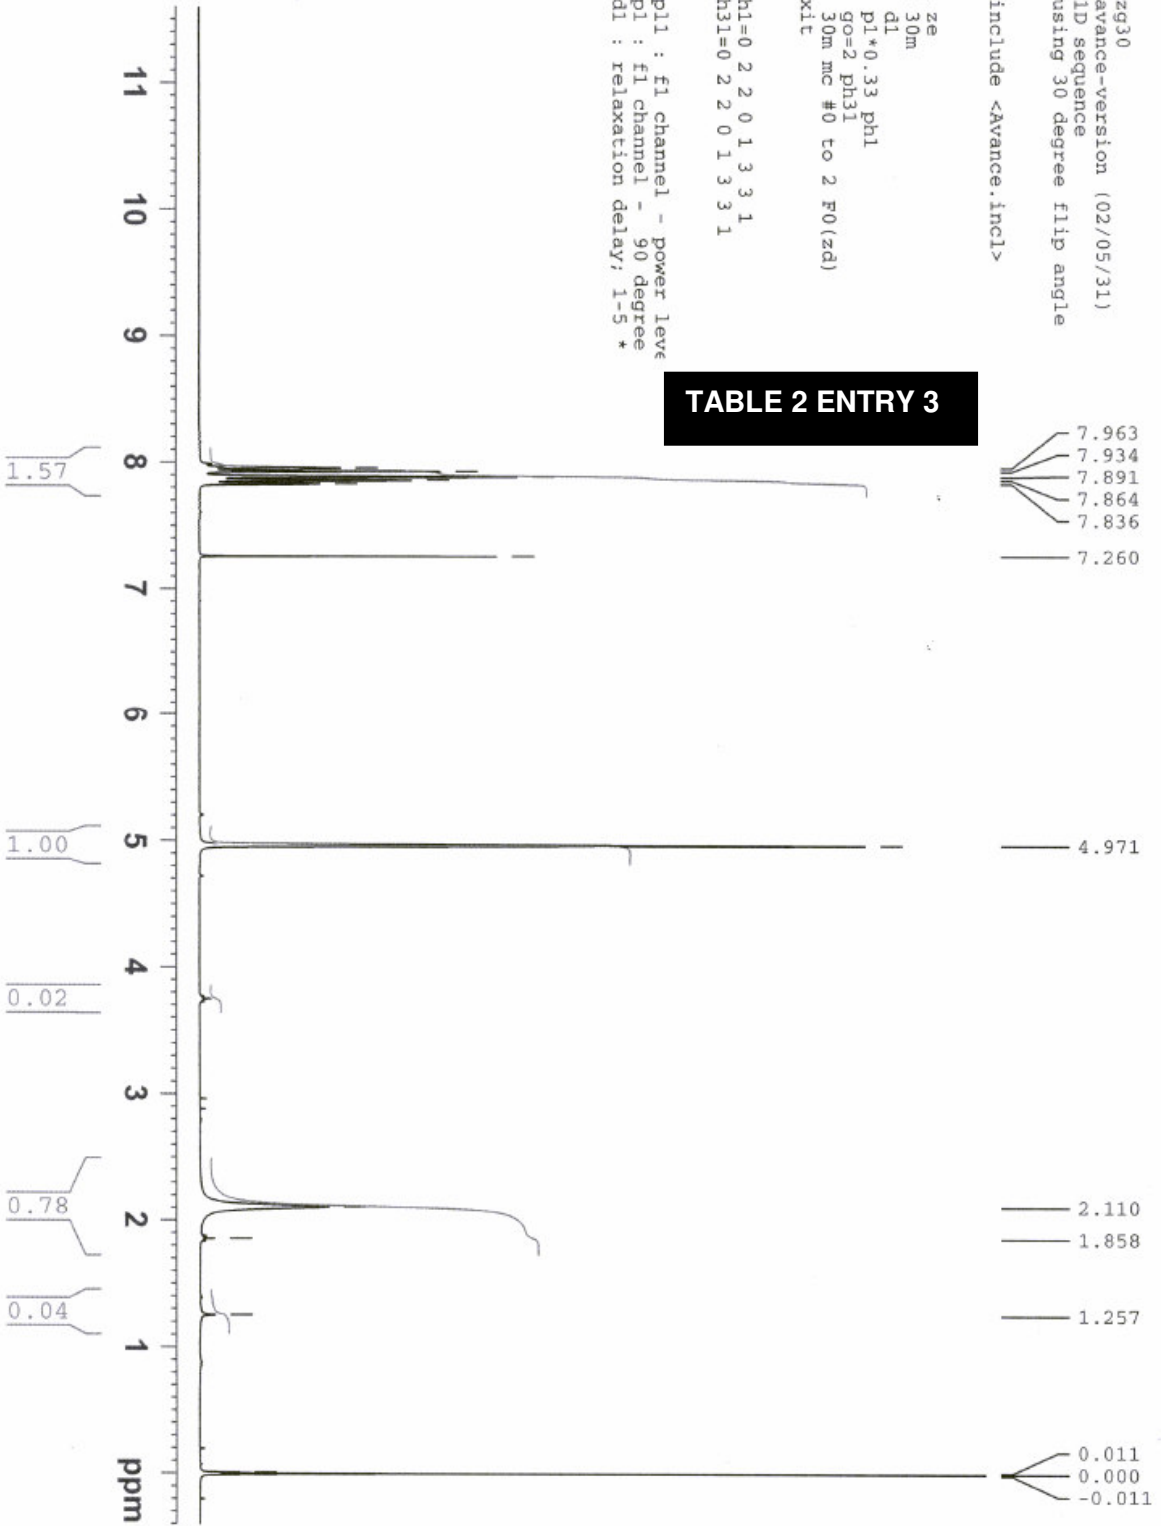

Current Data Parameters  
NAME 10383614  
EXPNO 10  
PROCNO 1

F2 - Acquisition Parameters  
Date\_ 20060717  
Time 12.53  
INSTRUM dpx300  
PROBHD 5 mm QNP 1H/13  
PULPROG zg30  
TD 48848  
SOLVENT CDCl3  
NS 64  
DS 2  
SWH 7183.908 Hz  
FIDRES 0.147067 Hz  
AQ 3.398709 sec  
RG 724.1  
DW 69.600 usec  
DE 6.00 usec  
TE 299.2 K  
D1 6.59999990 sec  
MCREST 0.00000000 sec  
MCNRK 0.01500000 sec

===== CHANNEL f1 =====  
NUC1 1H  
P1 9.40 usec  
PL1 0.00 dB  
SFO1 300.1330010 MHz  
F2 - Processing parameters  
SI 65536  
SF 300.1300061 MHz  
WDW EM  
SSB 0  
LB 0.30 Hz  
GB 0  
PC 2.00

*D. H. A.*  
18/7/06



10383614, RX0002/42A, BRUKER DPX300, QNP, H1 SPECTRUM, SOLV:-CDCL3/TMS

7.963  
7.934  
7.891  
7.864  
7.836

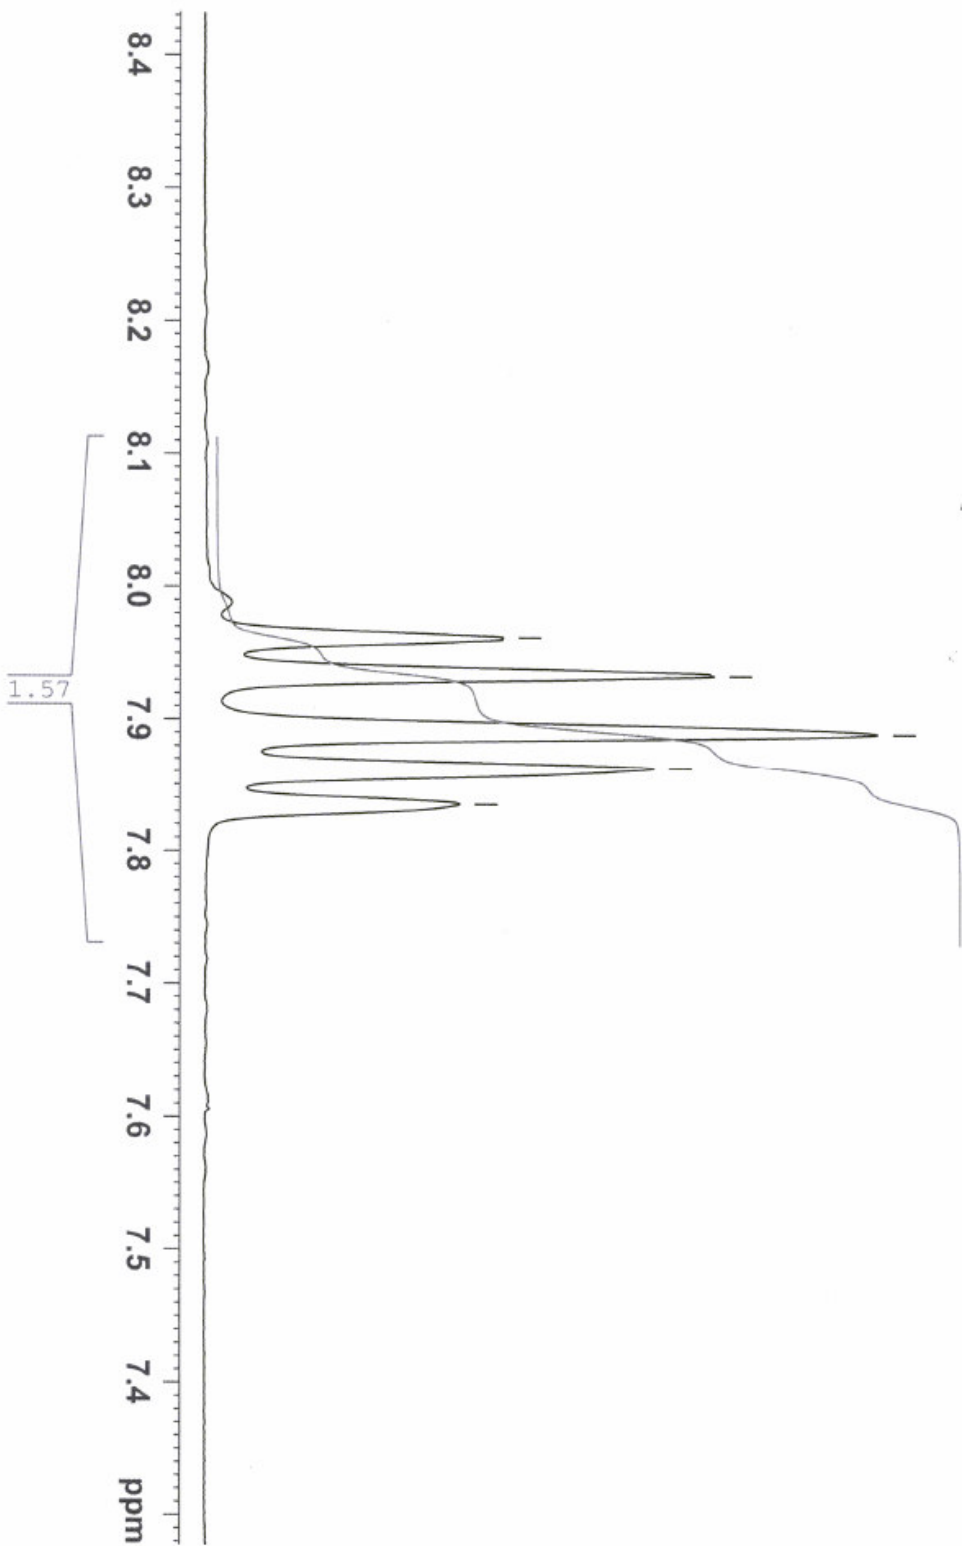

**Intertek** **ASG**

Current Data Parameters  
NAME 10383614  
EXPNO 10  
PROCNO 1

F2 - Acquisition Parameters  
Date\_ 20060717  
Time 12.53  
INSTRUM gpx300  
PROBHD 5 mm QNP 1H/13  
PULPROG zg30  
TD 48848  
SOLVENT CDCl3  
NS 64  
DS 2  
SWH 7183.908 Hz  
FIDRES 0.147067 Hz  
AQ 3.3989709 sec  
RG 724.1  
RW 69.600 usec  
DE 6.00 usec  
TE 299.2 K  
D1 6.59999990 sec  
MCREST 0.00000000 sec  
MCPRK 0.01500000 sec

===== CHANNEL f1 =====  
NUC1 1H  
P1 9.40 usec  
PL1 0.00 dB  
SFO1 300.1330010 MHz

F2 - Processing Parameters  
SI 65536  
SF 300.1300061 MHz  
WDW EM  
SSB 0  
LB 0.30 Hz  
GB 0  
PC 2.00

*0.166*

10383515, RX0002/40C, BRUKER DPX300, QNP, H1 SPECTRUM, SOLV:- CDCl3/TMS

```
;zg30
;advance-version (02/05/11)
;1d sequence
;using 30 degree flip angle
```

0.067  
0.059  
0.049  
0.037  
0.026  
0.019  
7.293  
7.286  
7.275  
7.264  
7.253  
7.246  
7.123  
7.116  
7.094  
7.065  
7.038  
7.029  
7.021  
7.007  
7.000  
6.992  
6.977  
6.970  
6.961

```
#include <Avance.incl>
```

```
1 ze
2 30m
d1
p1*0.33 ph1
go=2 ph31
30m mc #0 to 2 F0(zd)
exit
```

```
ph1=0 2 2 0 1 3 3 1
ph31=0 2 2 0 1 3 3 1
```

```
;p1 : f1 channel - power leve
;p1 : f1 channel - 90 degree
;d1 : relaxation delay: 1-5 *
```

# TABLE 2 ENTRY 4

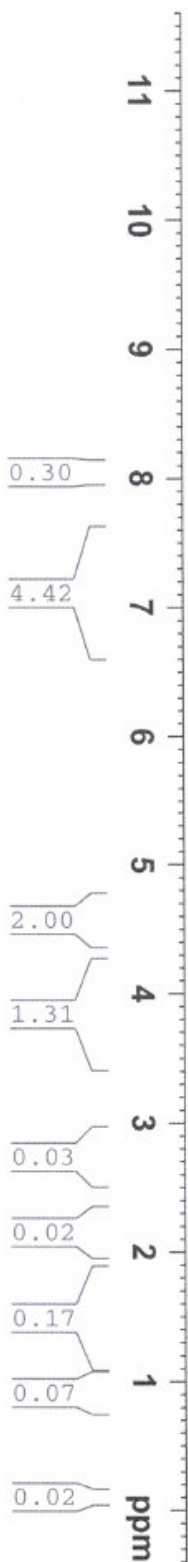

**Intertek ASG**

Current Data Parameters  
NAME 10383515  
EXPNO 10  
PROCNO 1

F2 - Acquisition Parameters  
Date\_ 20060713  
Time 13.12  
INSTRUM dpx300  
PROBHD 5 mm QNP 1H/13  
PULPROG zg30  
TD 48848  
SOLVENT CDCl3  
NS 64  
DS 2  
SWH 7183.908 Hz  
FIDRES 0.147067 Hz  
AQ 3.398709 sec  
RG 71.8  
DM 69.600 usec  
DE 6.00 usec  
TE 299.2 K  
D1 6.59999990 sec  
ICREST 0.00000000 sec  
MCMRK 0.01500000 sec

===== CHANNEL f1 =====  
NUC1 1H  
P1 9.40 usec  
PL1 0.00 dB  
SFO1 300.1330010 MHz  
F2 - Processing parameters  
SI 65536  
SF 300.1300091 MHz  
WDW EM  
SSB 0  
LB 0.30 Hz  
GB 0  
PC 250.00

S.A.  
1317100

10383515, RX0002/40C, BRUKER DPX300, QNP, H1 SPECTRUM, SOLV:- CDCl3/TMS

```
;zg30
;adv-verse 102.05/31)
;1d sequence
;using 30 degree flip angle
```

7.293  
7.286  
7.275  
7.264  
7.253  
7.246  
7.123  
7.116  
7.094  
7.065  
7.038  
7.029  
7.021  
7.007  
7.000  
6.992  
6.977  
6.970  
6.961

```
#include <Avance.incl>
```

```
1 ze
2 30m
d1
p1*0.33 ph1
go=2 ph31
30m mc #0 to 2 F0(zd)
exit
```

```
ph1=0 2 2 0 1 3 3 1
ph31=0 2 2 0 1 3 3 1
```

```
;p1 : f1 channel - power leve
;p1 : f1 channel - 90 degree
;d1 : relaxation delay; 1-5 *
```

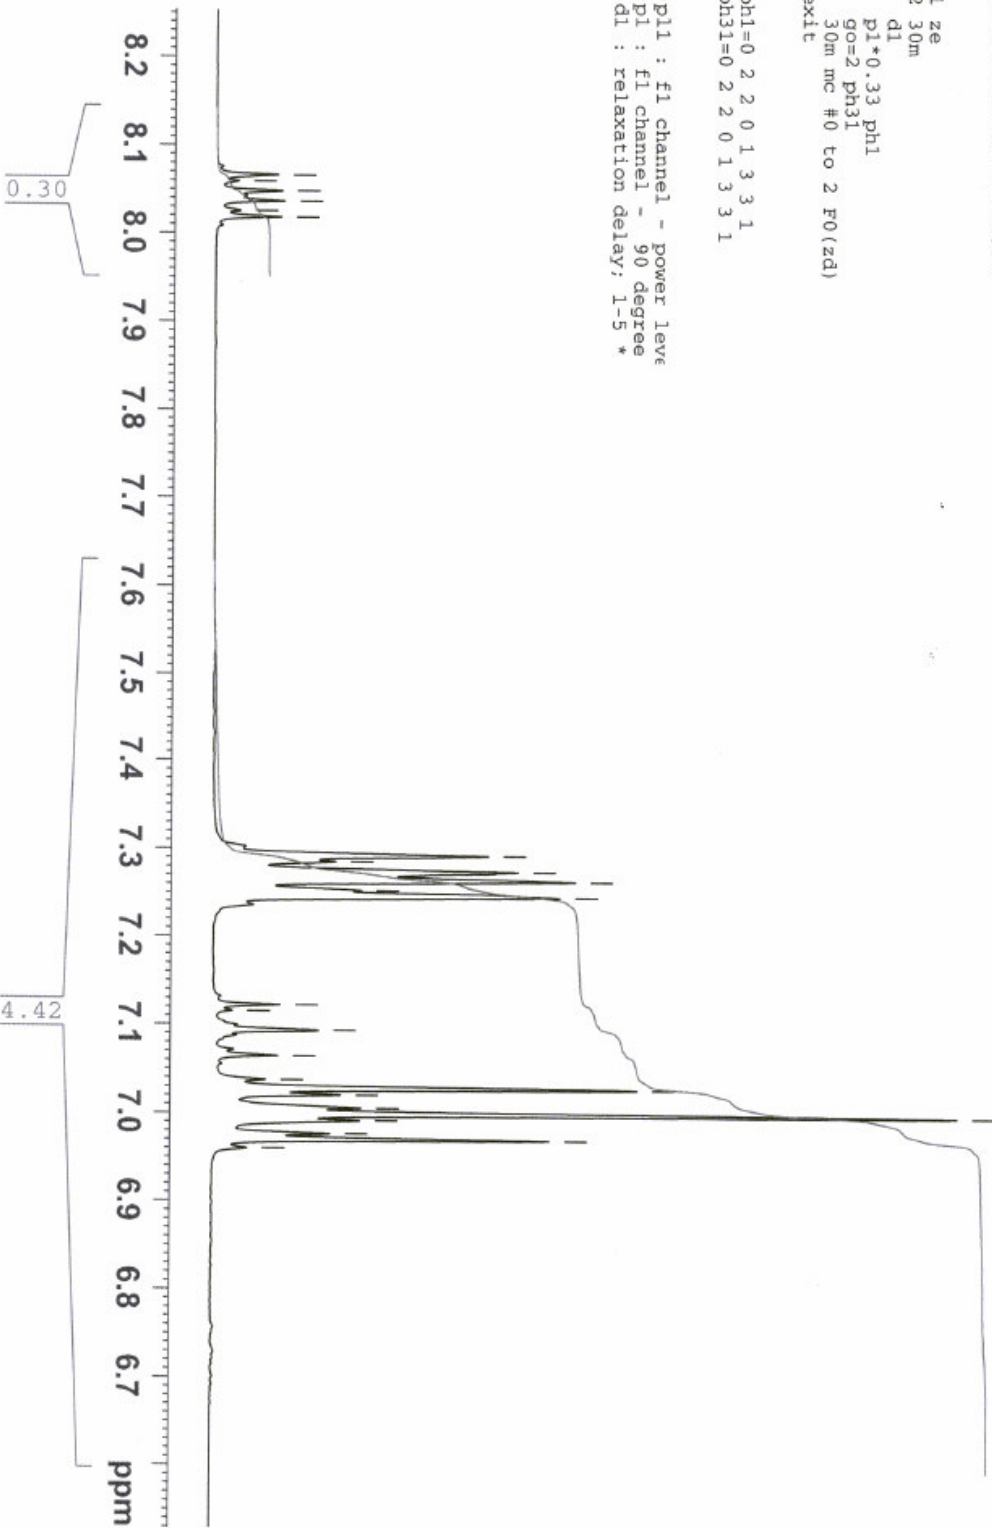

**Intertek ASG**

Current Data Parameters  
NAME 10383515  
EXPNO 10  
PROCNO 1

F2 - Acquisition Parameters  
Date\_ 20060713  
Time 13.12  
INSTRUM dpx300  
PROBHD 5 mm QNP 1H/13  
PULPROG zg30  
TD 48848  
SOLVENT CDCl3  
NS 64  
DS 2  
SWH 7183.908 Hz  
FIDRES 0.147067 Hz  
AQ 3.398709 sec  
RG 71.8  
DW 69.600 usec  
DE 6.00 usec  
TE 299.2 K  
D1 6.59899990 sec  
MCREST 0.00000000 sec  
MCWRK 0.01500000 sec

===== CHANNEL f1 =====  
NUC1 1H  
P1 9.40 usec  
PL1 0.00 dB  
SFO1 300.1330010 MHz

F2 - Processing Parameters  
SI 65536  
SF 300.1300091 MHz  
WDW EM  
SSB 0  
LB 0.30 Hz  
GB 0  
PC 250.00

5.1710e

```
;zg30
;advance-version (02/05/31)
;1d sequence
;using 30 degree flip angle
```

```
#include <Avance.incl>
```

```
1 ze
2 30m
d1
p1*0.33 ph1
go=2 ph31
30m mc #0 to 2 F0(zd)
exit
```

```
ph1=0 2 2 0 1 3 3 1
ph31=0 2 2 0 1 3 3 1
```

```
;p11 : f1 channel - power level for pulse (defau
;p1 : f1 channel - 90 degree high power pulse
;d1 : relaxation delay; 1-5 * T1
```

Table 3 Entry 1

```
Current Data Parameters
NAME 10368288
EXPNO 10
PROCNO 1

F2 - Acquisition Parameters
Date_ 20050526
Time 21.12
INSTRUM dpx300
PROBHD 5 mm QNP 1H/1
PULPROG zg30
TD 48848
SOLVENT CDCL3
NS 64
DS 2
SWH 7183.908 Hz
FIDRES 0.147067 Hz
AQ 3.3998709 sec
RG 724.1
DE 69.600 usec
TE 299.2 K
D1 6.59999990 sec
MCREST 0.00000000 sec
MCWRR 0.01500000 sec

===== CHANNEL f1 =====
NUC1 1H
P1 9.40 usec
PL1 0.00 dB
SFO1 300.1330010 MHz

F2 - Processing parameters
SI 65536
SF 300.1300079 MHz
WDW EM
SSB 0
LB 0.30 Hz
GB 0
PC 2.00
```

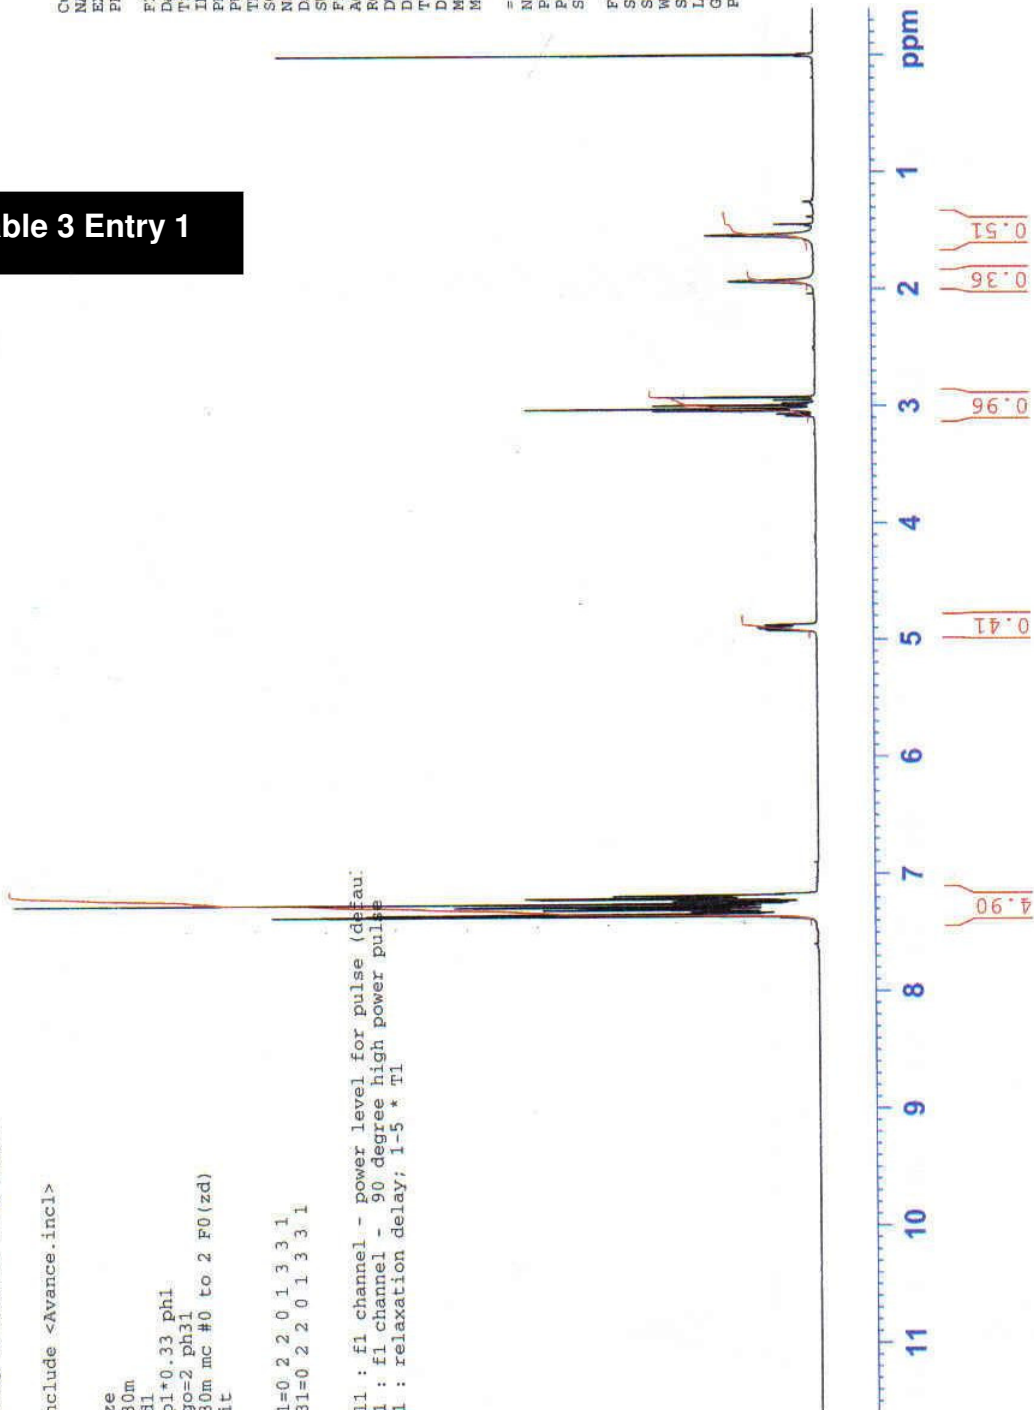

*D. North*  
27/5/05

10368288, NBZ5769/1/8, BRUKER DPX300, QNP, H1 SPECTRUM, SOLV:- CDCL3/TMS

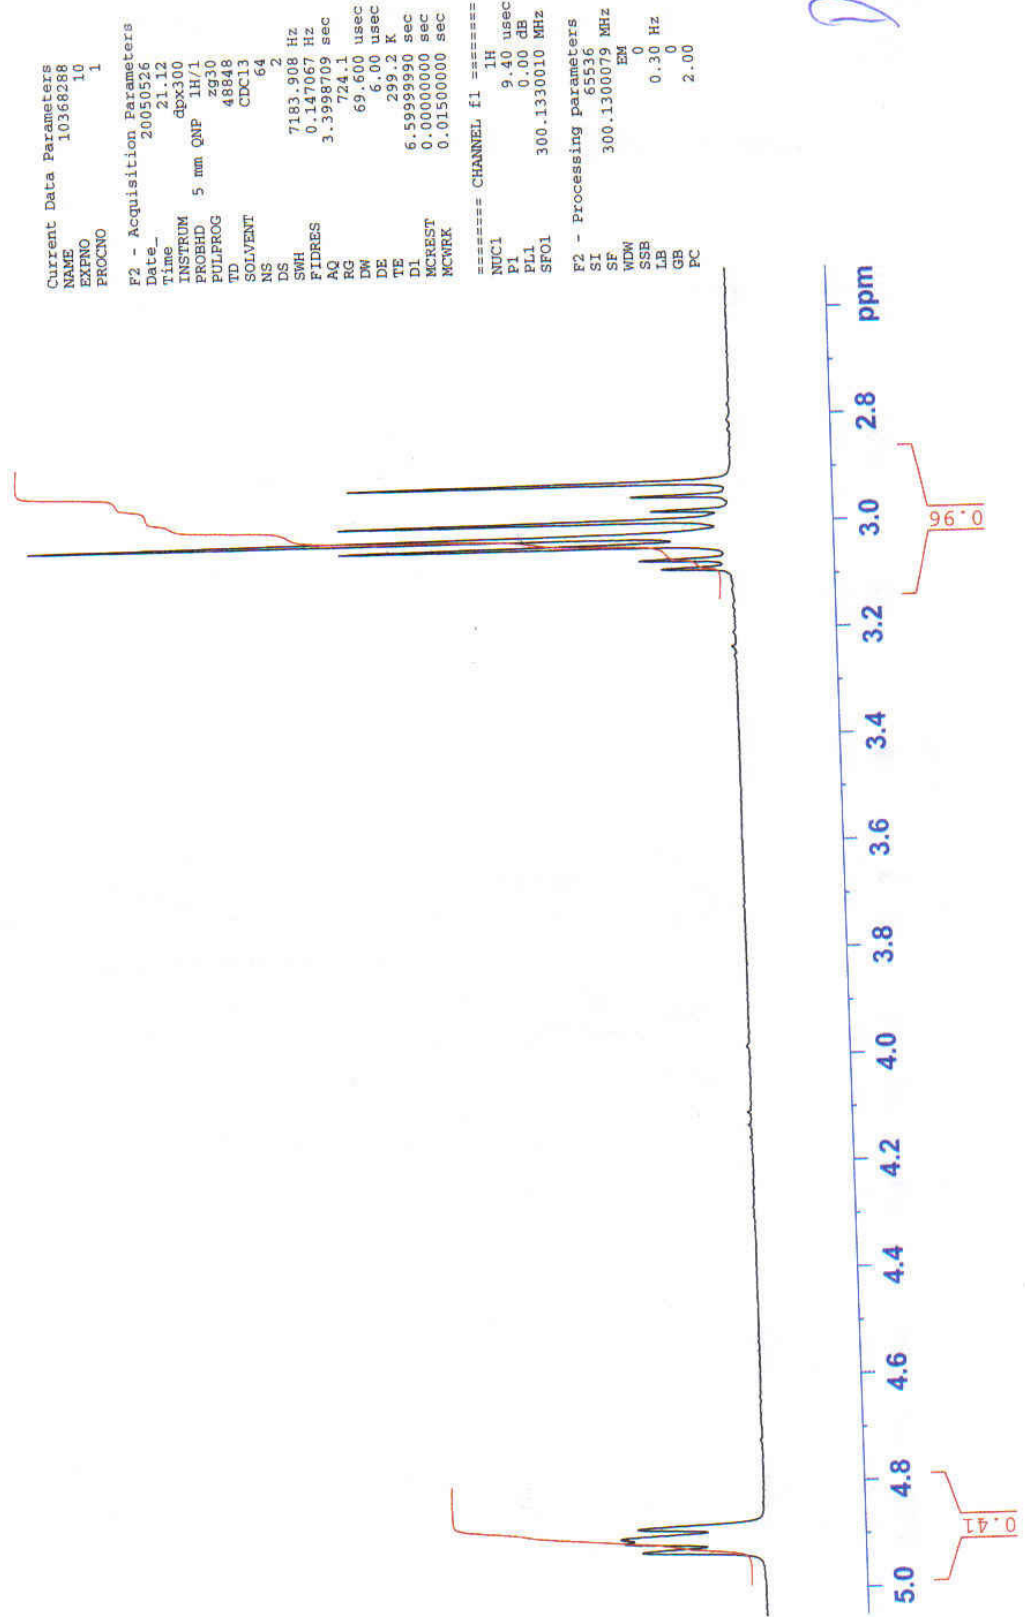

*D. M. G.*  
 27/5/05



Current Data Parameters  
NAME 10368288  
EXPNO 10  
PROCNO 1

F2 - Acquisition Parameters  
Date\_ 20050526  
Time 21.12  
INSTRUM dpx300  
PROBHD 5 mm QNP 1H/1  
PULPROG zg30  
TD 48848  
SOLVENT CDCL3  
NS 64  
DS 2  
SWH 7183.908 Hz  
FIDRES 0.147067 Hz  
AQ 3.3998709 sec  
RG 724.1  
DW 69.600 usec  
DE 6.00 usec  
TE 299.2 K  
D1 6.59999990 sec  
MCREST 0.00000000 sec  
MCWRK 0.01500000 sec

===== CHANNEL f1 =====  
NUC1 1H  
P1 9.40 usec  
PL1 0.00 dB  
SFO1 300.1330010 MHz

F2 - Processing parameters  
SI 65536  
SF 300.1300079 MHz  
WDW EM  
SSB 0  
LB 0.30 Hz  
GB 0  
PC 2.00

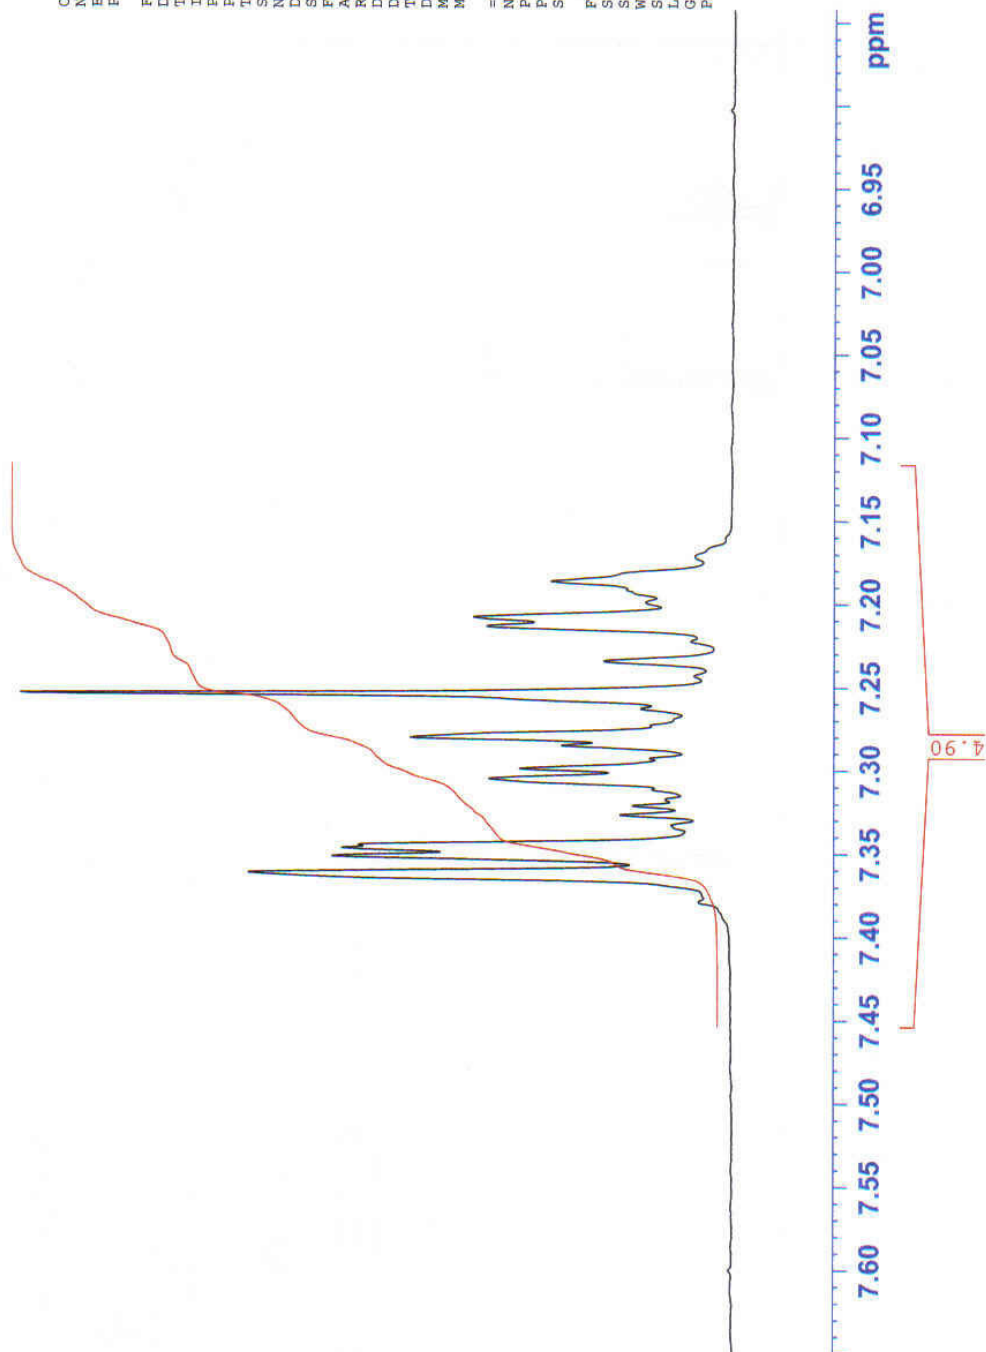

D-164  
27/5/05



```

;zg30
;advance-version (02/05/31)
;ld sequence
;using 30 degree flip angle

```

```

#include <Avance.incl>

```

```

1 ze
2 30m
d1
p1*0.33 ph1
go=2 ph31
30m mc #0 to 2 F0(zd)
exit

```

```

ph1=0 2 2 0 1 3 3 1
ph31=0 2 2 0 1 3 3 1

```

```

;p11 : f1 channel - power level for pulse (default)
;pi : f1 channel - 90 degree high power pulse
;d1 : relaxation delay; 1-5 * T1

```

Table 3 Entry 2

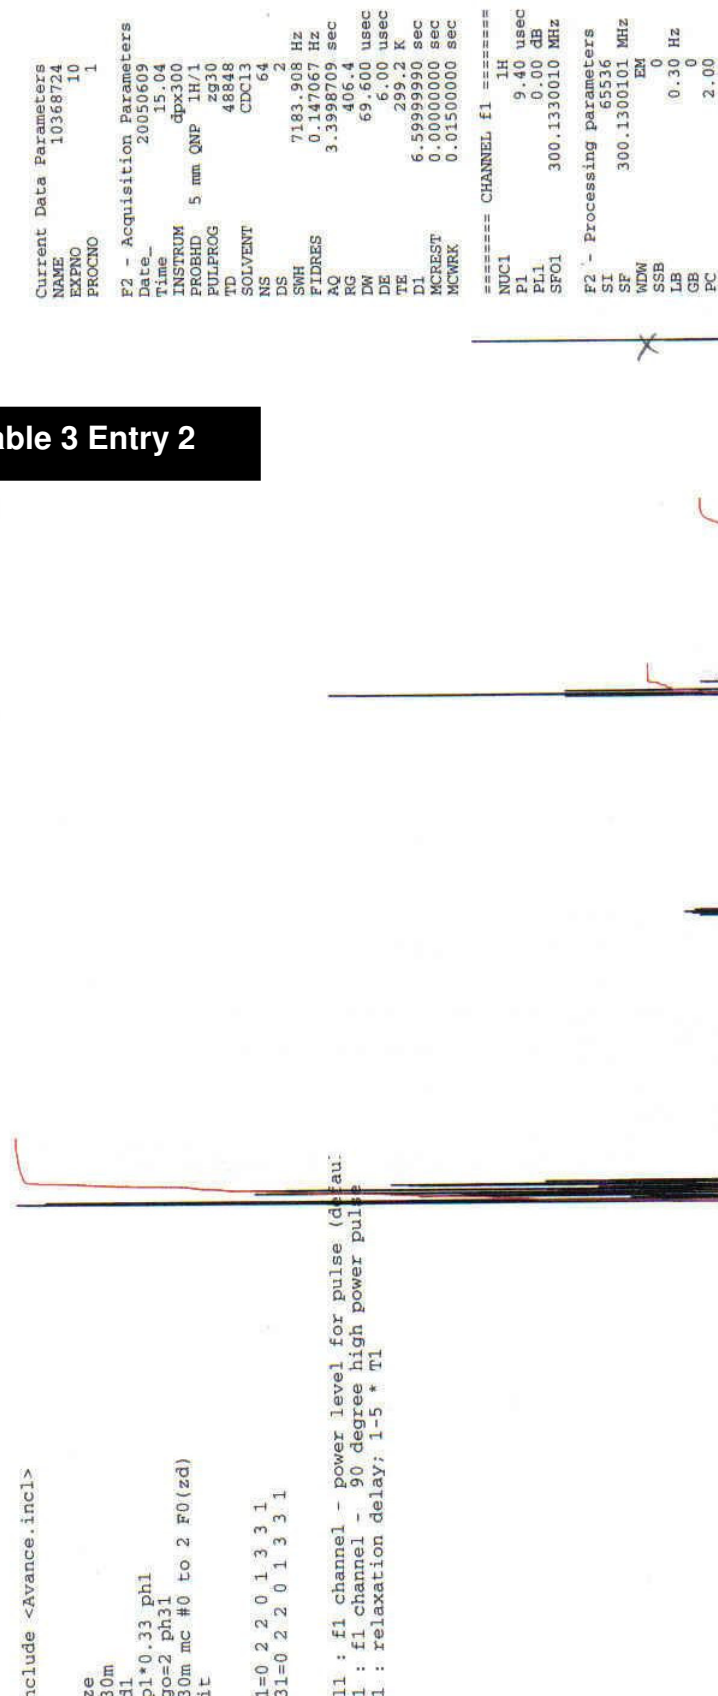

*J. N. N. N.*  
10/6/05

10368724, NBZ5769-9-4, BRUKER DPX300, QNP, H1 SPECTRUM, SOLV: CDCL3/TMS

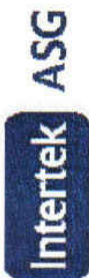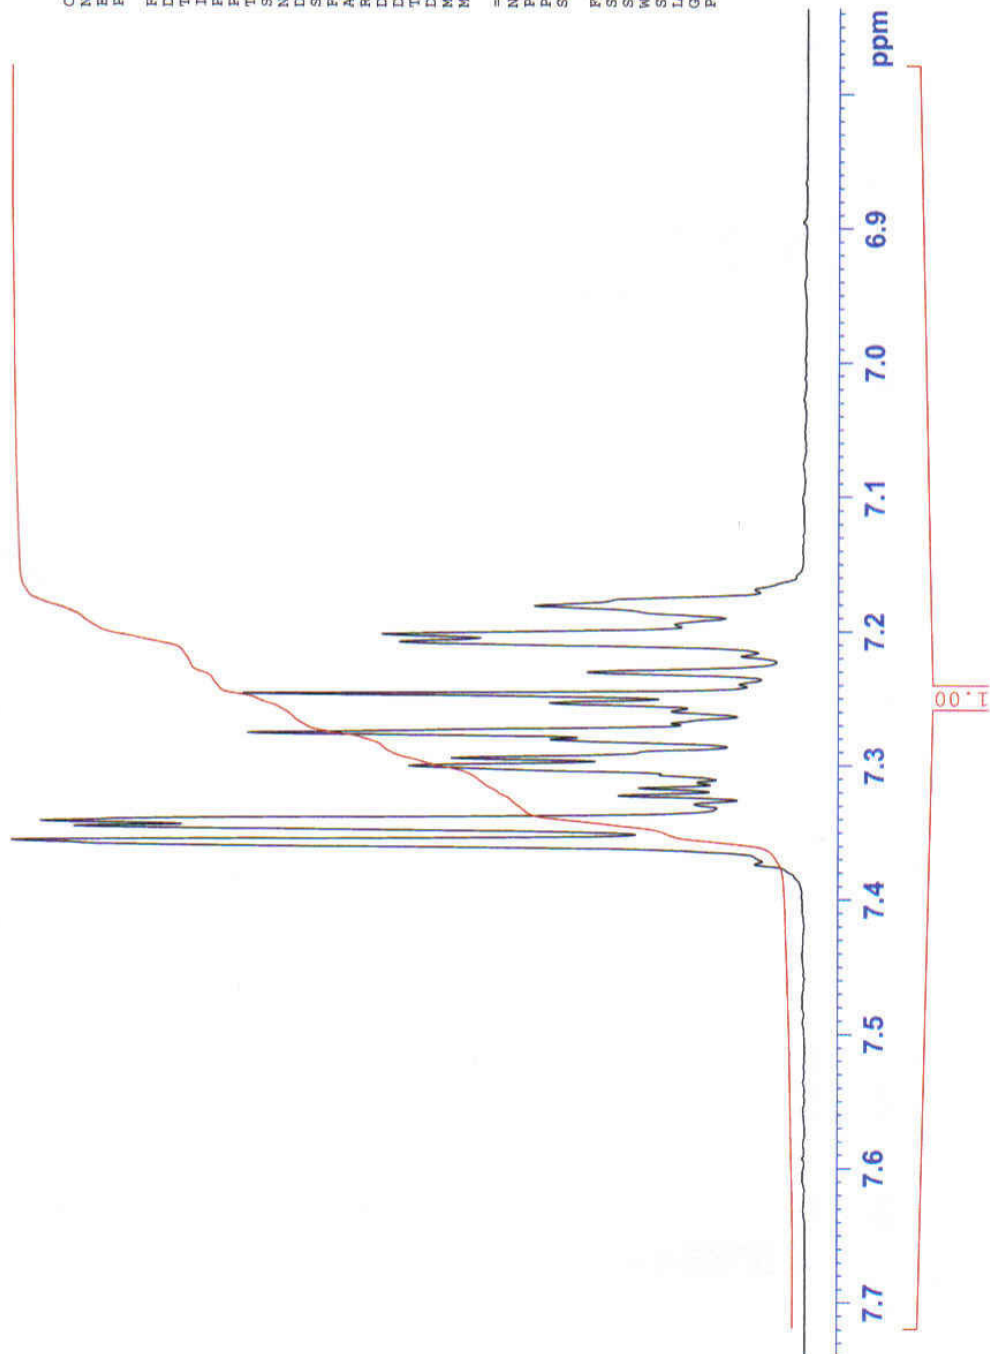

Current Data Parameters  
NAME 10368724  
EXPNO 10  
PROCNO 1

F2 - Acquisition Parameters  
Date\_ 20050609  
Time 15.04  
INSTRUM dpx300  
PROBHD 5 mm QNP 1H/1  
PULPROG zg30  
TD 48848  
SOLVENT CDCl3  
NS 64  
DS 2  
SWH 7183.908 Hz  
FIDRES 0.147067 Hz  
AQ 3.3998709 sec  
RG 406.4  
DM 69.600 usec  
DE 6.00 usec  
TE 299.2 K  
D1 6.59999990 sec  
MCREST 0.00000000 sec  
MCWRK 0.01500000 sec

===== CHANNEL f1 =====  
NUC1 1H  
P1 9.40 usec  
PL1 0.00 dB  
SFO1 300.1330010 MHz

F2 - Processing parameters  
SI 65536  
SF 300.1300101 MHz  
WDW EM  
SSB 0  
LB 0.30 Hz  
GB 0  
PC 2.00

*J. New*  
10/6/05

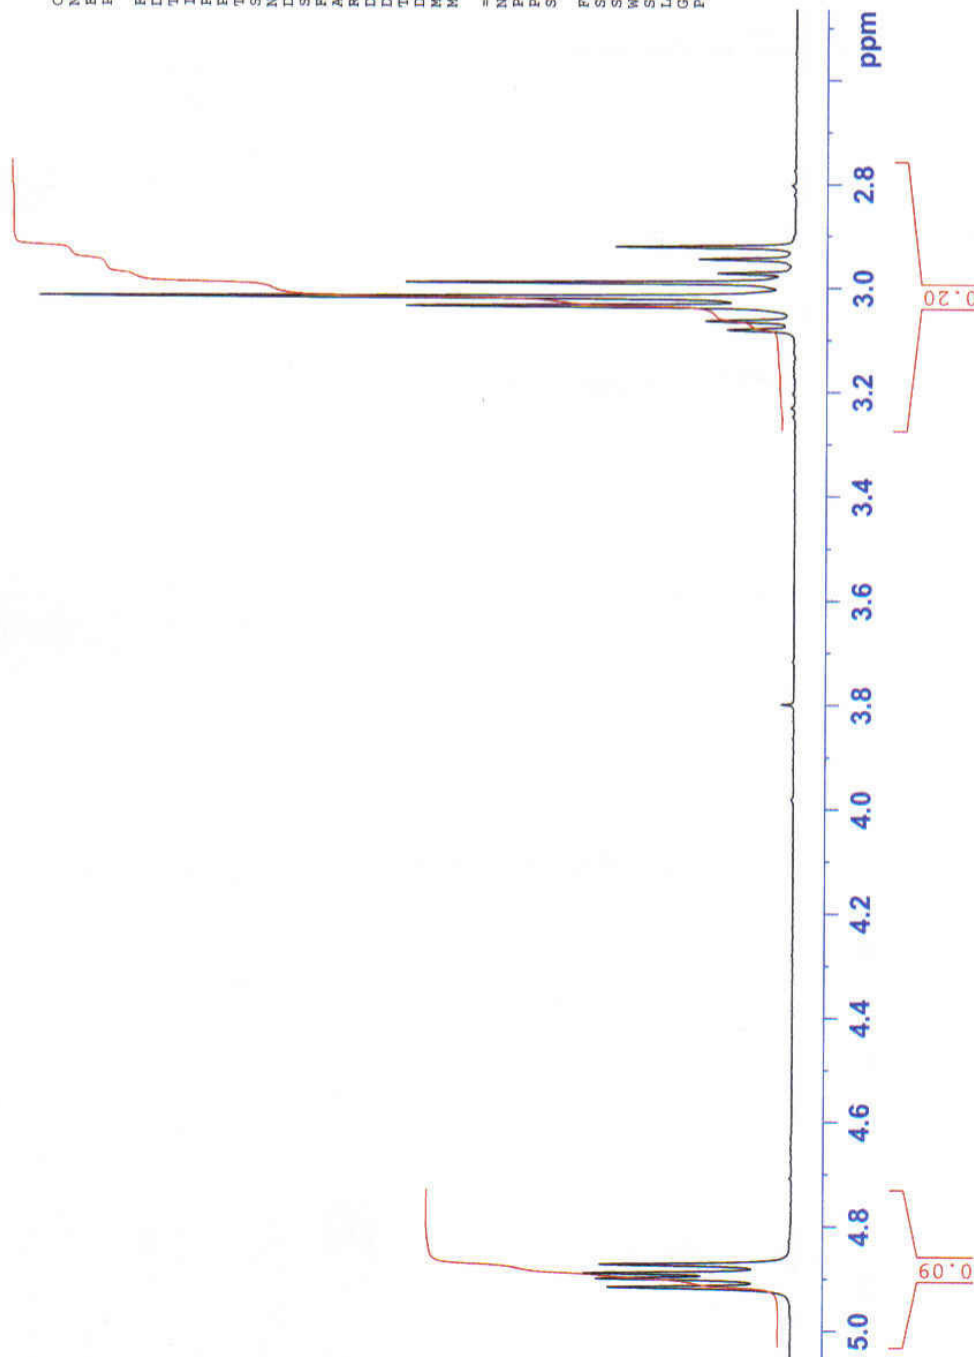

*D. N. M. H.*  
10/6/05

```

;zg30
;advance-version (02/05/31)
;1D sequence
;using 30 degree flip angle

```

```

#include <Advance.incl>

```

```

1 ze
2 30m
d1
  pl*0.33 ph1
  go=2 ph31
  30m mc #0 to 2 F0(zd)
exit

```

```

ph1=0 2 2 0 1 3 3 1
ph31=0 2 2 0 1 3 3 1

```

```

;pl1 : f1 channel - power level for pulse (default)
;pl : f1 channel - 90 degree high power pulse
;d1 : relaxation delay: 1-5 * T1

```

Table 3 Entry 3

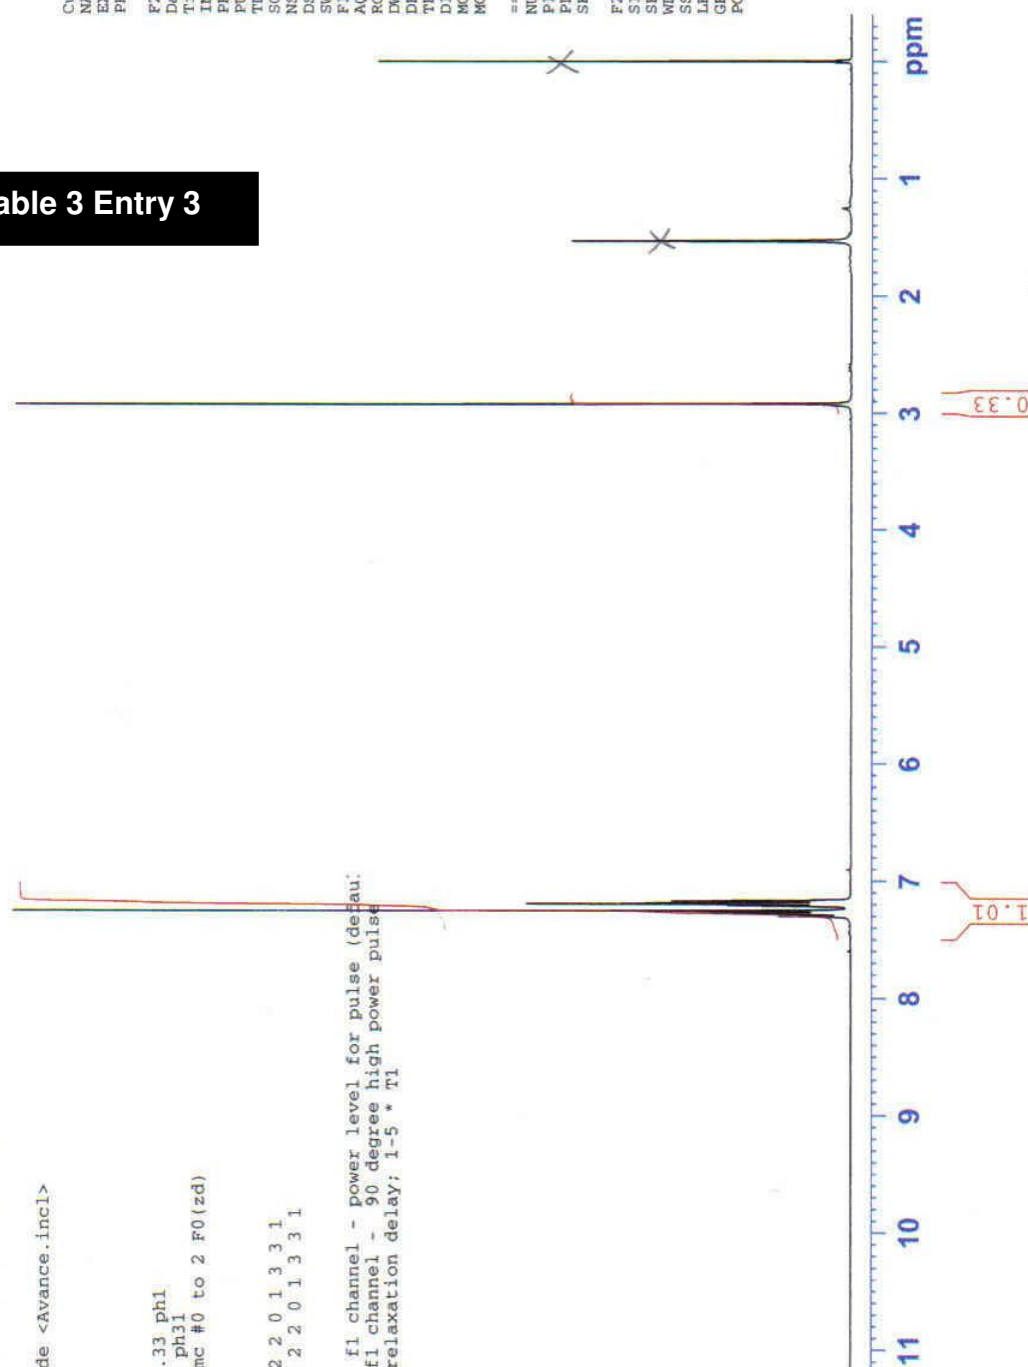

```

Current Data Parameters
NAME 10368725
EXPNO 10
PROCNO 1

F2 - Acquisition Parameters
Date_ 20050609
Time 15.21
INSTRUM dpx300
PROBHD 5 mm QNP 1H/1
PULPROG zg30
TD 48848
SOLVENT CDCl3
NS 64
DS 2
SWH 7183.908 Hz
FIDRES 0.147067 Hz
AQ 3.3998709 sec
RG 1290.2
DE 69.600 usec
TE 299.2 K
D1 6.59999990 sec
MCREST 0.00000000 sec
MCWRRK 0.01500000 sec

===== CHANNEL f1 =====
NUC1 1H
P1 9.40 usec
PL1 0.00 dB
SFO1 300.1330010 MHz

F2 - Processing parameters
SI 65536
SF 300.1300074 MHz
WDW EM
SSB 0
LB 0.30 Hz
GB 0
PC 2.00

```

*D. N. N. N.*  
10/6/05

10368725, NBZ5769-9-5, BRUKER DPX300, QNP, H1 SPECTRUM, SOLV: CDCL3/TMS

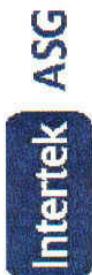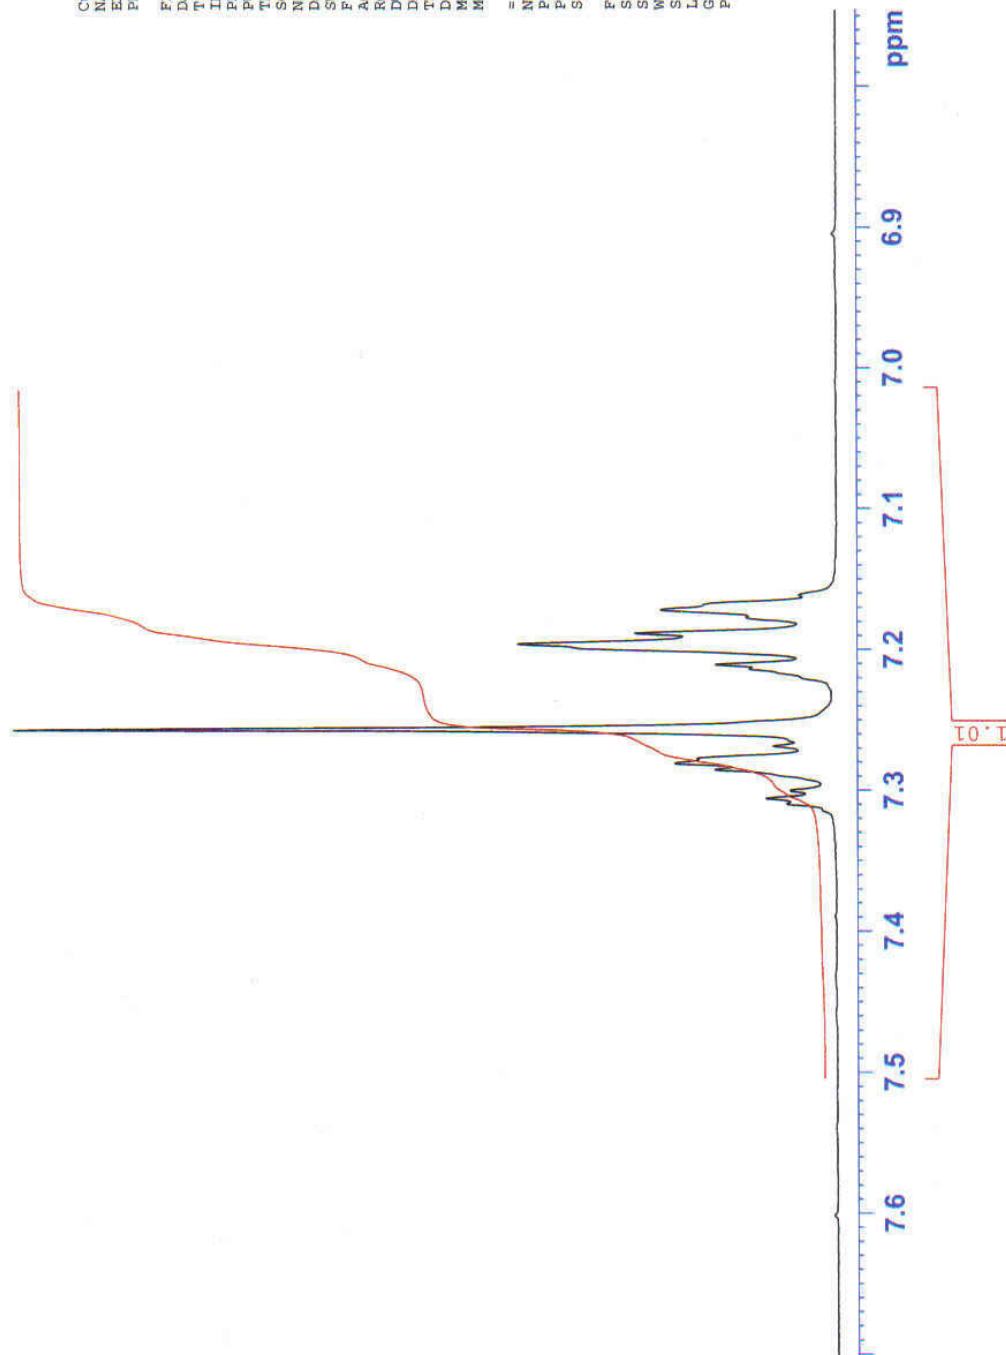

Current Data Parameters  
NAME 10368725  
EXPNO 10  
PROCNO 1

F2 - Acquisition Parameters  
Date\_ 20050609  
Time 15.21  
INSTRUM qnp300  
PROBHD 5 mm QNP 1H/1  
PULPROG zg30  
TD 48848  
SOLVENT CDCL3  
NS 64  
DS 2  
SWH 7183.908 Hz  
FIDRES 0.147067 Hz  
AQ 3.3998709 sec  
RG 1290.2  
DW 69.600 usec  
DE 6.00 usec  
TE 299.2 K  
D1 6.59999990 sec  
MCREST 0.00000000 sec  
MCWRK 0.01500000 sec

===== CHANNEL f1 =====  
NUC1 1H  
P1 9.40 usec  
PL1 0.00 dB  
SFO1 300.1330010 MHz

F2 - Processing parameters  
SI 65536  
SF 300.1300074 MHz  
WDW EM  
SSB 0  
LB 0.30 Hz  
GB 0  
PC 2.00

D. West  
10/6/05



```
;zg30
;advance-version (02/05/31)
;1D sequence
;using 30 degree flip angle
```

```
#include <Advance.incl>
```

```
1 ze
2 30m
d1
p1*0.33 ph1
go=2 ph31
30m mc #0 to 2 F0(zd)
exit
```

```
ph1=0 2 2 0 1 3 3 1
ph31=0 2 2 0 1 3 3 1
```

```
;p1 : f1 channel - power level for pulse (default)
;p1 : f1 channel - 90 degree high power pulse
;d1 : relaxation delay; 1-5 * T1
```

Table 3 Entry 4

```
Current Data Parameters
NAME 10368961
EXPNO 10
PROCNO 1

F2 - Acquisition Parameters
Date_ 20050615
Time 12.27
INSTRUM dpx300
PROBHD 5 mm QNP 1H/1
PULPROG zg30
TD 48848
SOLVENT CDCl3
NS 64
DS 2
SWH 7183.908 Hz
FIDRES 0.147067 Hz
AQ 3.3998709 sec
RG 1290.2
DE 69.600 usec
TE 299.2 K
D1 6.59999990 sec
MCREST 0.0000000 sec
MCWRK 0.01500000 sec

===== CHANNEL f1 =====
NUC1 1H
P1 9.40 usec
PL1 0.00 dB
SFO1 300.1330010 MHz

F2 - Processing parameters
SI 65536
SF 300.1300068 MHz
WDW EM
SSB 0
LB 0.30 Hz
GB 0
PC 2.00
```

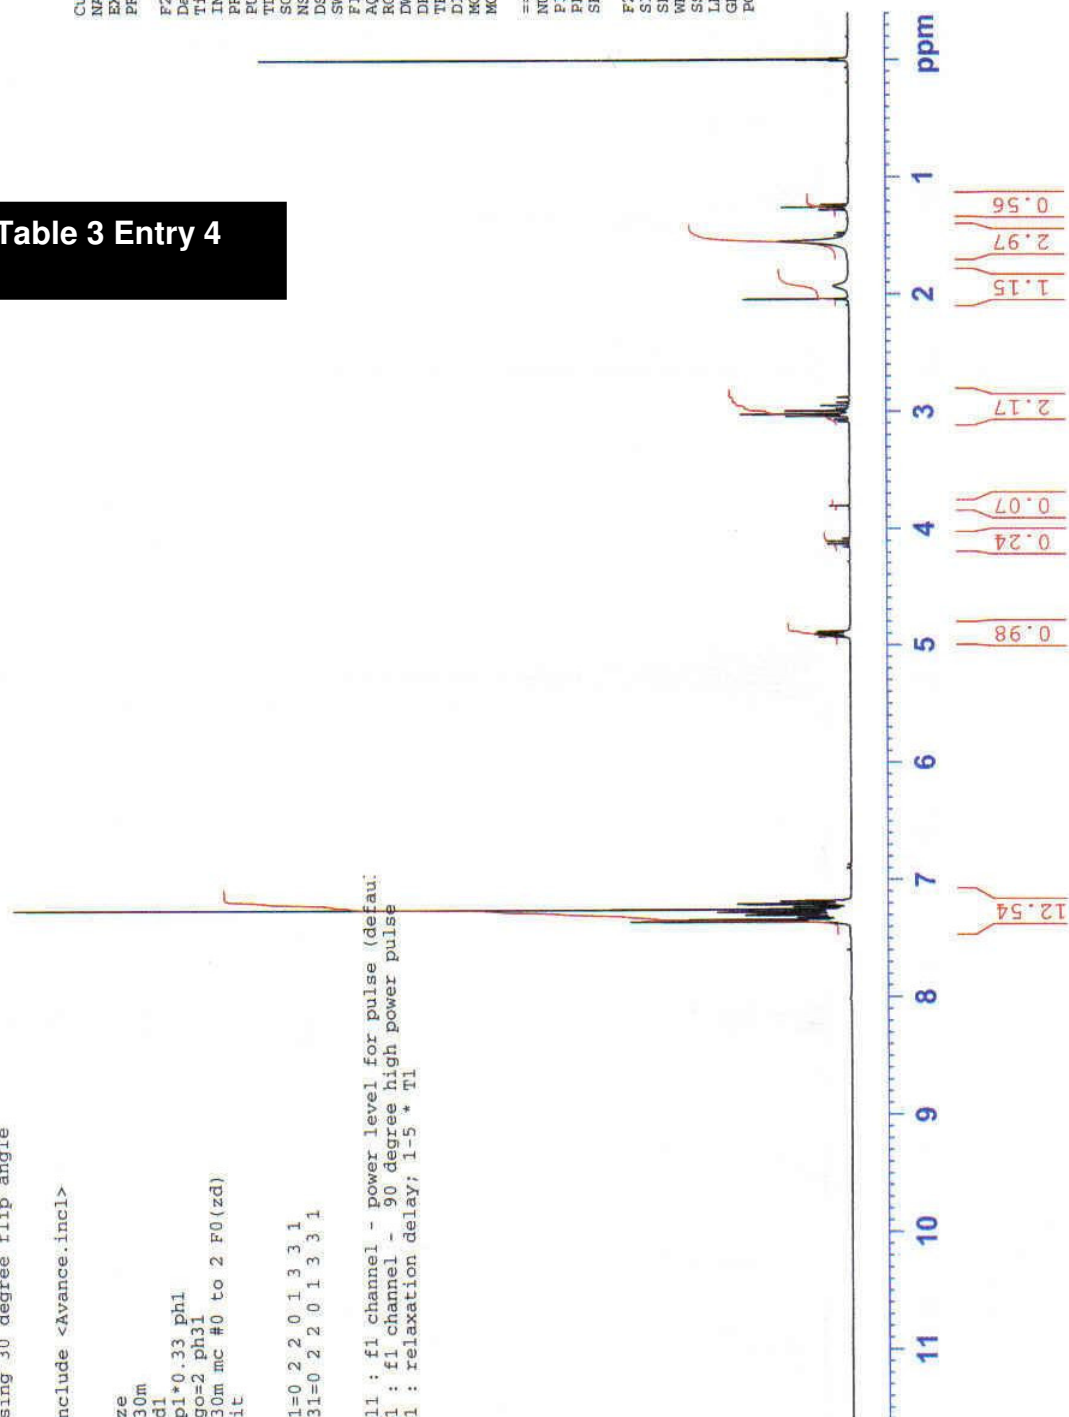

*P. Nut*  
16/6/05

Current Data Parameters  
 NAME 10368961  
 EXPNO 10  
 PROCNO 1

F2 - Acquisition Parameters  
 Date\_ 20050615  
 Time 12.27  
 INSTRUM dpx300  
 PROBHD 5 mm QNP 1H/1  
 PULPROG zg30  
 TD 48848  
 SOLVENT CDCL3  
 NS 64  
 DS 2  
 SWH 7183.908 Hz  
 FIDRES 0.147067 Hz  
 AQ 3.3998709 sec  
 RG 1290.2  
 DW 69.600 usec  
 DE 6.00 usec  
 TE 299.2 K  
 D1 6.5999990 sec  
 MCREST 0.0000000 sec  
 MCWCK 0.0150000 sec

===== CHANNEL f1 =====  
 NUC1 1H  
 P1 9.40 usec  
 PL1 0.00 dB  
 SF01 300.1330010 MHz

F2 - Processing parameters  
 SI 65536  
 SF 300.1300068 MHz  
 WDW EM  
 SSB 0  
 LB 0.30 Hz  
 GB 0  
 PC 2.00

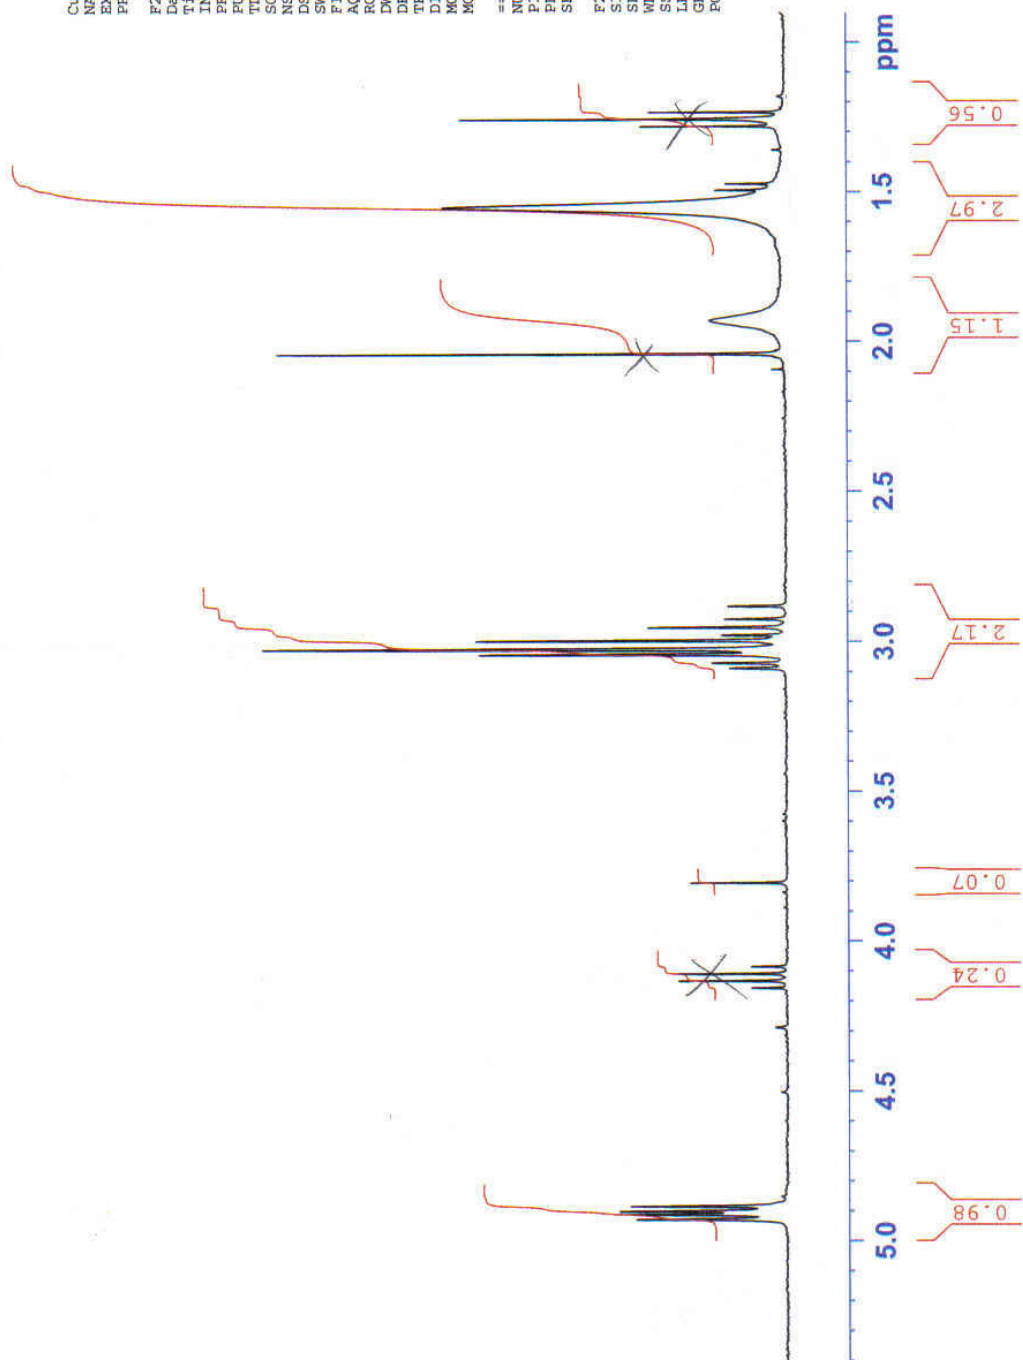

*J. Dut*  
 16/6/05

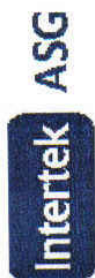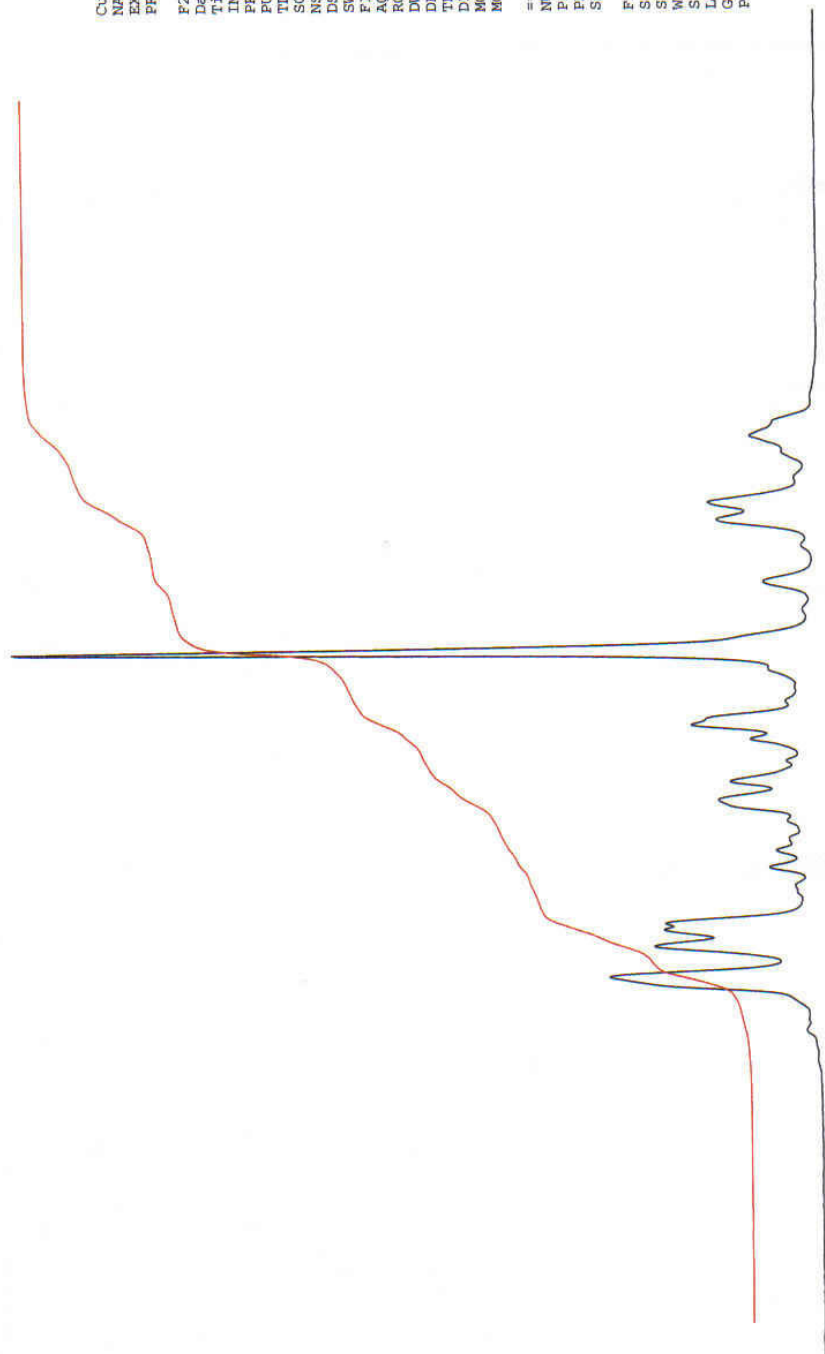

7.45 7.40 7.35 7.30 7.25 7.20 7.15 7.10 ppm

12.54

Current Data Parameters  
 NAME 10368961  
 EXPNO 10  
 PROCNO 1  
 F2 - Acquisition Parameters  
 Date\_ 20050615  
 Time 12.27  
 INSTRUM dpx300  
 PROBHD 5 mm QNP 1H/1  
 PULPROG zg30  
 TD 48848  
 SOLVENT CDCL3  
 NS 64  
 DS 2  
 SWH 7183.908 Hz  
 FIDRES 0.147067 Hz  
 AQ 3.3998709 sec  
 RG 1290.2  
 DW 69.600 usec  
 DE 6.00 usec  
 TE 299.2 K  
 D1 6.59999990 sec  
 MCREST 0.00000000 sec  
 MCWRR 0.01500000 sec  
 ===== CHANNEL f1 =====  
 NUC1 1H  
 P1 9.40 usec  
 PL1 0.00 dB  
 SFO1 300.1330010 MHz  
 F2 - Processing parameters  
 SI 65536  
 SF 300.1300068 MHz  
 EM 0  
 WDW 0  
 SSB 0  
 LB 0.30 Hz  
 GB 0  
 PC 2.00

*D. Dub*

16/6/05

*Signature*

```

;zg30
;avance-version (06/05/31)
;1d sequence
;using 30 degree flip angle
#include <Avance.incl>

```

7.395  
7.372  
7.348  
7.338  
7.332  
7.317  
7.313  
7.309  
7.303  
7.290  
7.248  
7.237  
7.226  
7.212

3.874  
3.852  
3.830  
3.685  
3.677

2.886  
2.864  
2.842

1.553  
1.251  
1.228

0.000

```

1 ze
2 30m
d1
p1*0.33 ph1
go=2 ph31
30m mc #0 to 2 F0(zd)
exit

ph1=0 2 2 0 1 3 3 1
ph31=0 2 2 0 1 3 3 1

;p1: f1 channel - power leve
;pl: f1 channel - 90 degree
;dl: relaxation delay; 1-5 *

```

# TABLE 4 ENTRY 1

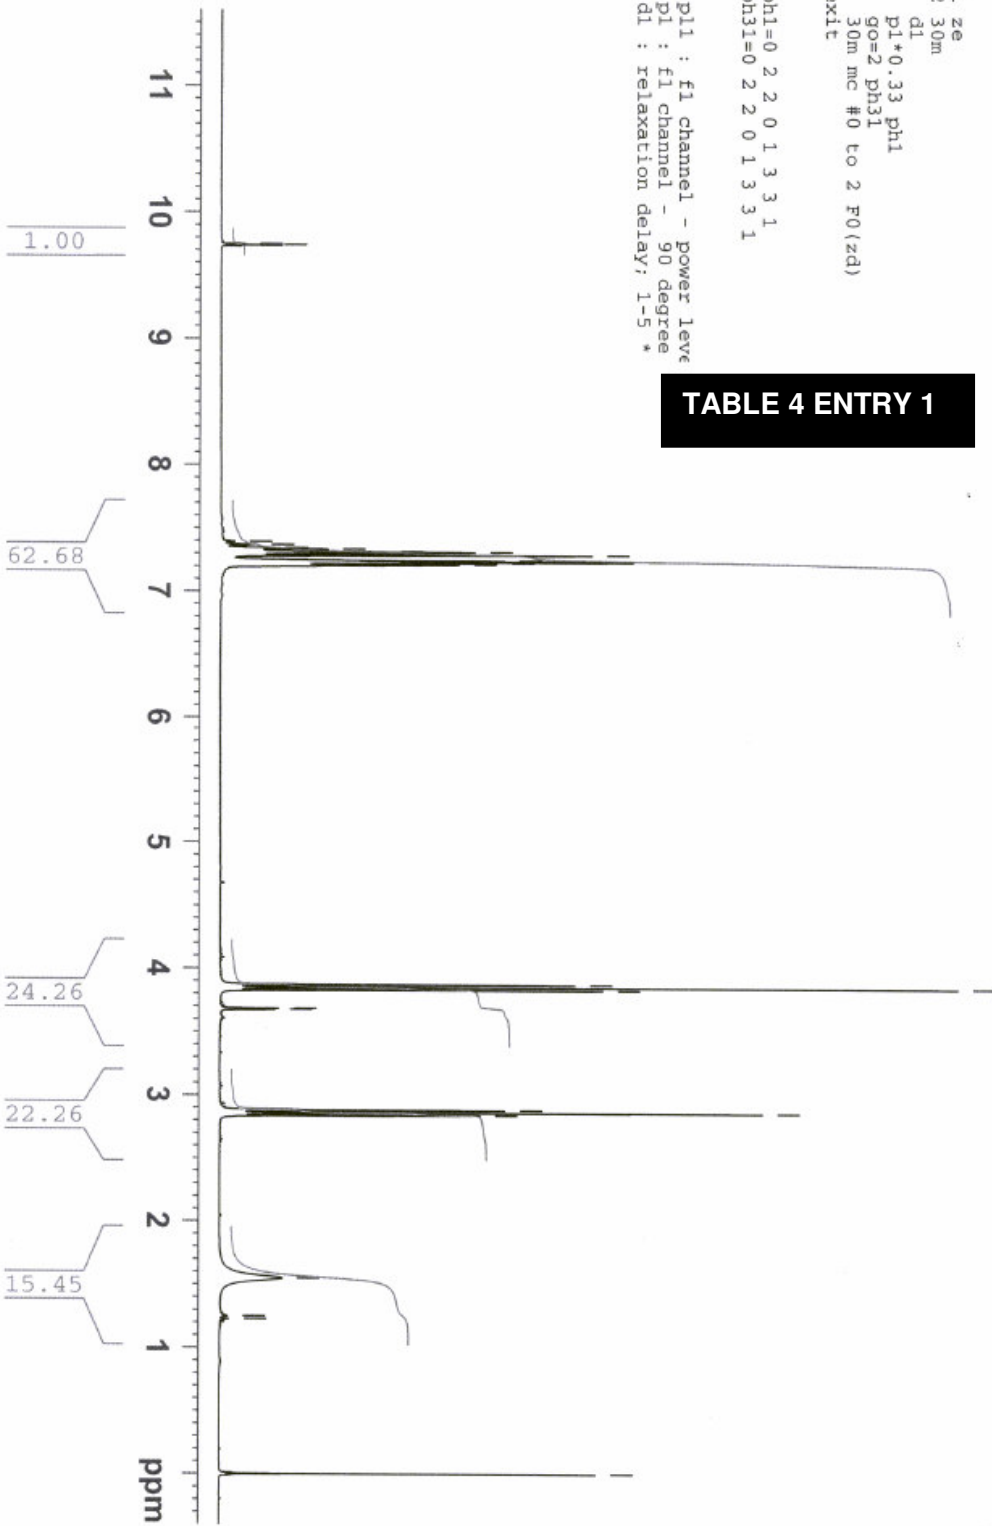

**Intertek ASG**

*Signature*

```

Current Data Parameters
NAME 10383689
EXPNO 10
PROCNO 1

F2 - Acquisition Parameters
Date_ 20060719
Time 12.00
INSTRUM dpx300
PROBHD 5 mm QNP 1H/13
PULPROG zg30
TD 48848
SOLVENT CDCl3
NS 64
DS 2
SWH 7183.908 Hz
FIDRES 0.147067 Hz
AQ 3.3998709 sec
RG 322.5
DM 69.600 usec
DE 6.00 usec
TE 299.2 K
D1 6.59999990 sec
MCREST 0.00000000 sec
MCWRK 0.01500000 sec

===== CHANNEL f1 =====
NUC1 1H
P1 9.40 usec
PL1 0.00 dB
SFO1 300.1350010 MHz

F2 - Processing parameters
SI 65536
SF 300.1300095 MHz
WDW EM
SSB 0
LB 0.30 Hz
GB 0
PC 20.00

```

*P. West*  
1917106

10383689, RX0002/44A, BRUKER DPX300, QNP, H1 SPECTRUM, SOLV:-CDCl3/TMS

7.395  
7.372  
7.348  
7.338  
7.332  
7.317  
7.313  
7.309  
7.303  
7.290  
7.248  
7.237  
7.226  
7.212

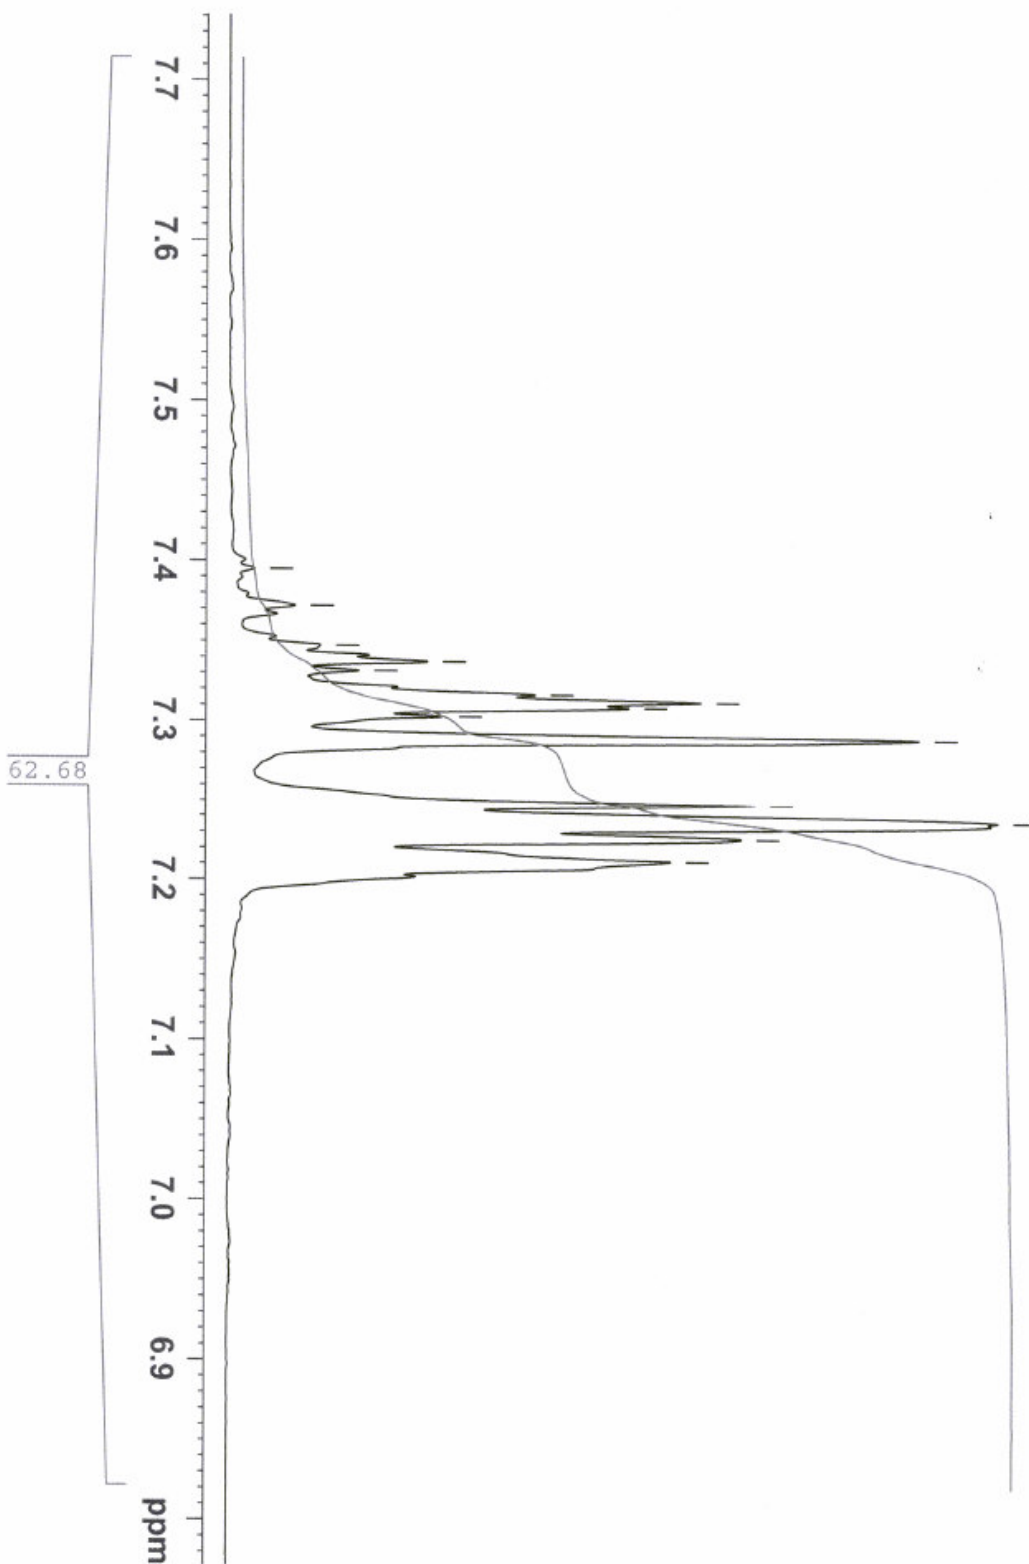

**Intertek** ASG

Current Data Parameters  
NAME 10383689  
EXPNO 10  
PROCNO 1

F2 - Acquisition Parameters  
Date\_ 20060719  
Time 12.00  
INSTRUM dpx300  
PROBHD 5 mm QNP 1H/13  
PULPROG zg30  
TD 48848  
SOLVENT CDCl3  
NS 64  
DS 2  
SWH 7183.908 Hz  
FIDRES 0.147067 Hz  
AQ 3.398709 sec  
RG 322.5  
DW 69.600 usec  
DE 6.00 usec  
TE 299.2 K  
D1 6.59999990 sec  
MCREST 0.00000000 sec  
MCWRK 0.01500000 sec

===== CHANNEL f1 =====  
NUC1 1H  
P1 9.40 usec  
PL1 0.00 dB  
SFO1 300.1330010 MHz

F2 - Processing Parameters  
SI 65536  
SF 300.1300095 MHz  
WDW EM  
SSB 0  
LB 0.30 Hz  
GB 0  
PC 20.00

*D. Nutt*  
1/17/06



10383689, RX0002/44A, BRUKER DPX300, QNP, H1 SPECTRUM, SOLV:-CDCl3/TMS

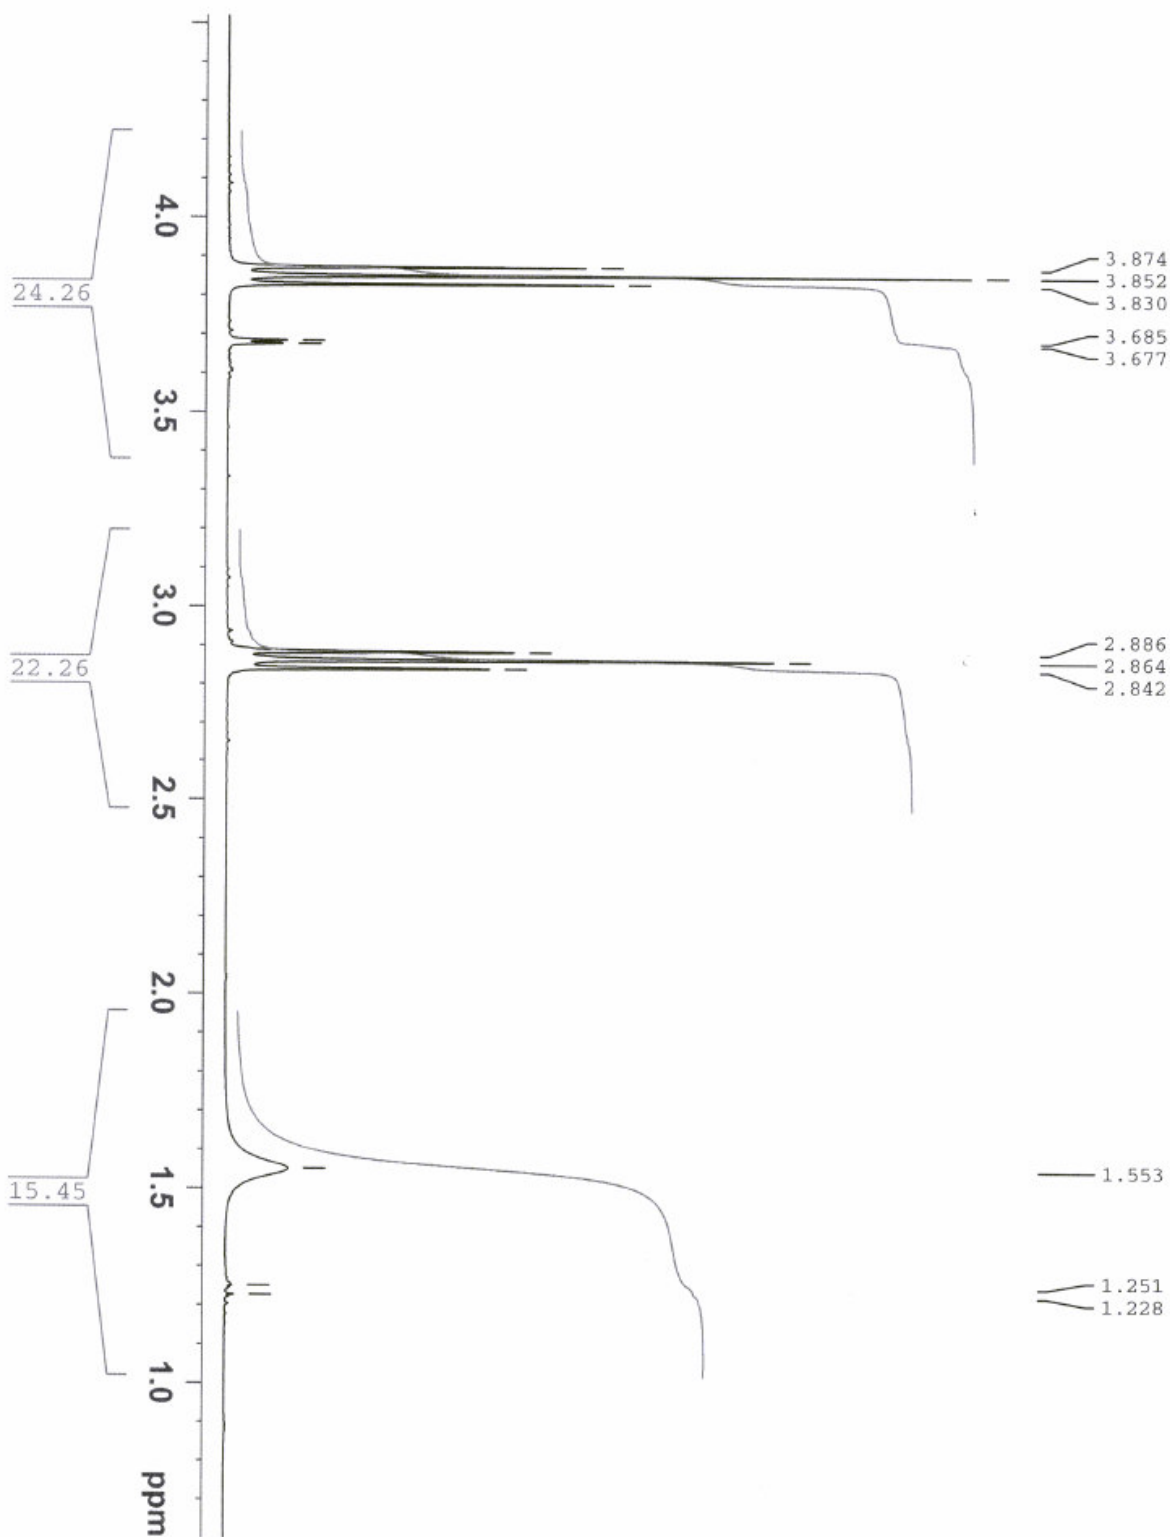

**Intertek ASG**

Current Data Parameters  
 NAME 10383689  
 EXPNO 10  
 PROCNO 1  
 F2 - Acquisition Parameters  
 Date\_ 20060719  
 Time 12.00  
 INSTRUM dpx300  
 PROBD 5 mm QNP 1H/13  
 PULPROG zg30  
 TD 48848  
 SOLVENT CDCl3  
 NS 64  
 DS 2  
 SWH 7183.908 Hz  
 FIDRES 0.147067 Hz  
 AQ 3.3998709 sec  
 RG 322.5  
 DW 69.600 usec  
 DE 6.00 usec  
 TE 299.2 K  
 D1 6.59999990 sec  
 MCREST 0.00000000 sec  
 MCPRK 0.01500000 sec  
 ===== CHANNEL f1 =====  
 NUC1 1H  
 P1 9.40 usec  
 PL1 0.00 dB  
 SFO1 300.1330010 MHz  
 F2 - Processing parameters  
 SI 65536  
 SF 300.1300095 MHz  
 WDW EM  
 SSB 0  
 LB 0.30 Hz  
 GB 0  
 PC 20.00

*P. Hunt*  
 19/7/06

10383690, RX0002/44B, BRUKER DPX300, QNP, H1 SPECTRUM, SOLV:-CDCL3/TMS

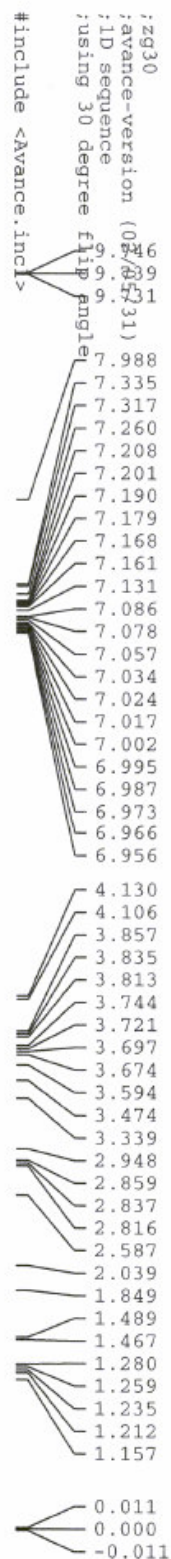

```

1 ze
2 30m
d1
p1*0.33 ph1
go=2 ph31
30m mc #0 to 2 F0(zd)
exit
ph1=0 2 2 0 1 3 3 1
ph31=0 2 2 0 1 3 3 1
; p1 : f1 channel - power leve
; p1 : f1 channel - 90 degree
; d1 : relaxation delay: 1-5 *

```

TABLE 4 ENTRY 2

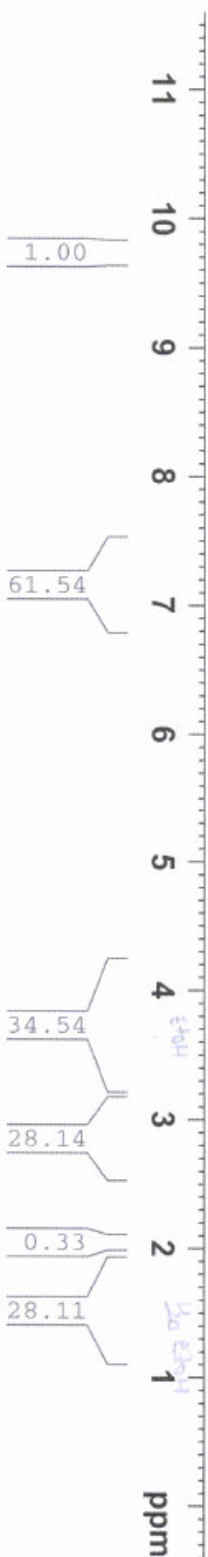

Intertek ASG

Current Data Parameters  
NAME 10383690  
EXPNO 10  
PROCNO 1

F2 - Acquisition Parameters  
Date\_ 20060719  
Time 12.18  
INSTRUM dpx300  
PROBHD 5 mm QNP 1H/13  
PULPROG zg30  
TD 48848  
SOLVENT CDC13  
NS 64  
DS 2  
SWH 7183.908 Hz  
FIDRES 0.147067 Hz  
AQ 3.3998709 sec  
RG 322.5  
DW 69.600 usec  
DE 6.00 usec  
TE 299.2 K  
D1 6.59999990 sec  
MCREST 0.00000000 sec  
MCWPRK 0.01500000 sec

===== CHANNEL f1 =====  
NUC1 1H  
P1 9.40 usec  
PL1 0.00 dB  
SFO1 300.1330010 MHz

F2 - Processing parameters  
SI 65536  
SF 300.1300062 MHz  
WDW EM  
SSB 0  
LB 0.30 Hz  
GB 0  
PC 2.00

*J. Webb*  
19/12/06

10383690, RX0002/44B, BRUKER DPX300, QNP, H1 SPECTRUM, SOLV:-CDCL3/TMS

7.335  
7.317  
7.260  
7.208  
7.201  
7.190  
7.179  
7.168  
7.161  
7.131  
7.086  
7.078  
7.057  
7.034  
7.024  
7.017  
7.002  
6.995  
6.987  
6.973  
6.966  
6.956

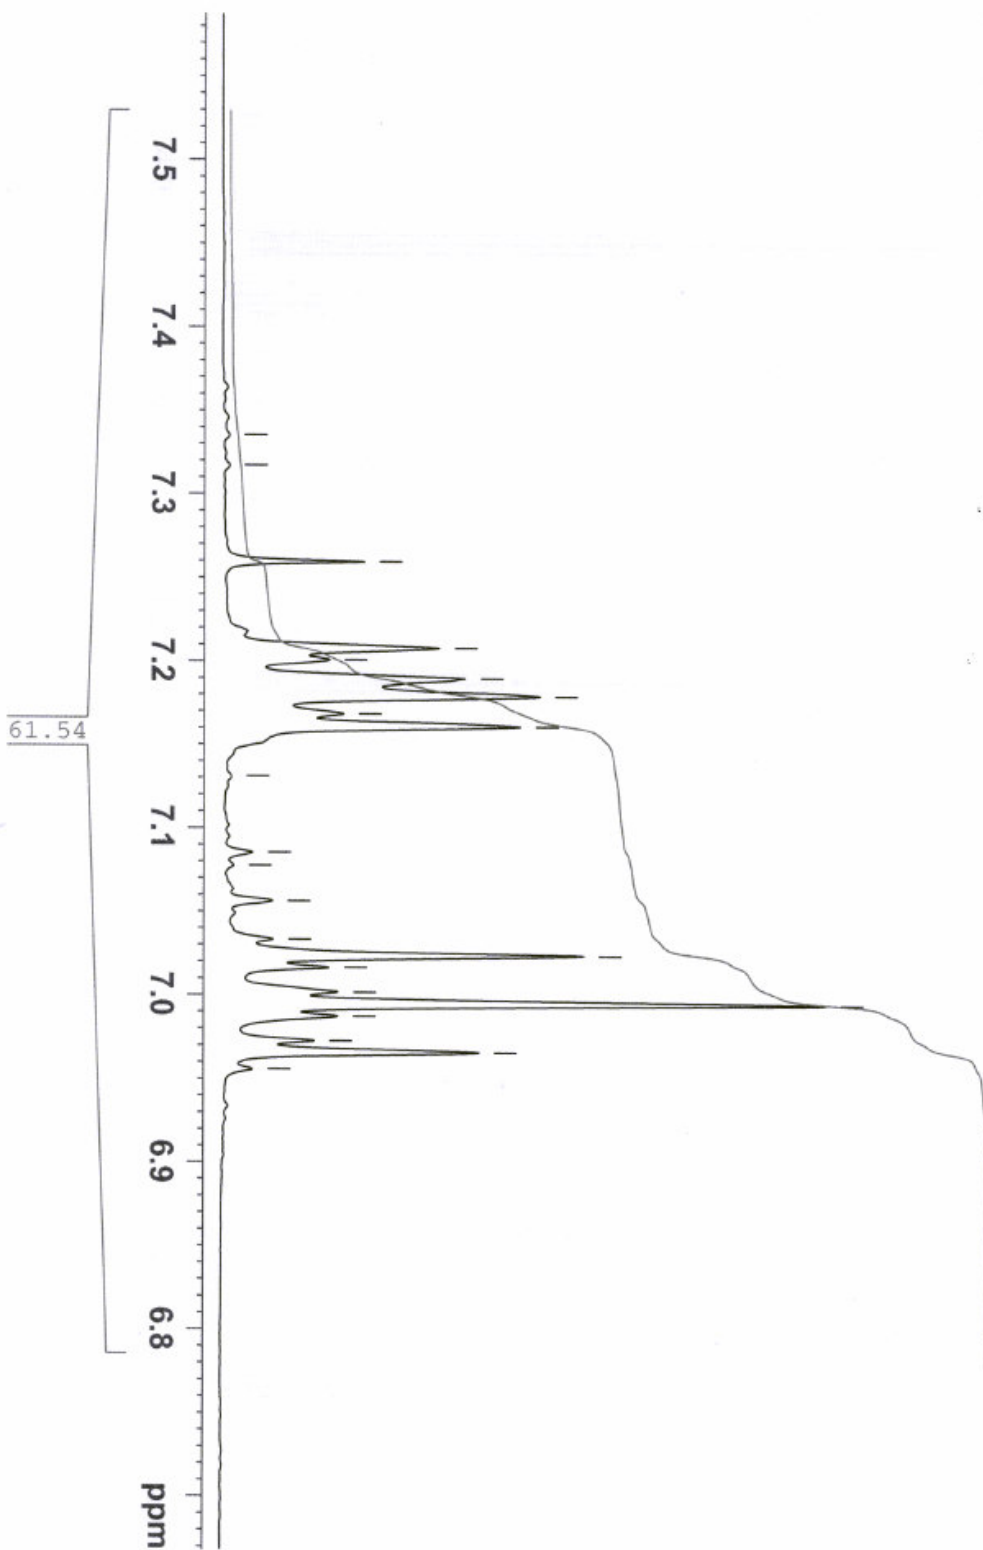

**Intertek ASG**

Current Data Parameters  
NAME 10383690  
EXPNO 10  
PROCNO 1

F2 - Acquisition Parameters  
Date\_ 20060719  
Time 12.18  
INSTRUM dpx300  
PROBHD 5 mm QNP 1H/13  
PULPROG zg30  
TD 48848  
SOLVENT CDCl3  
NS 64  
DS 2  
SWH 7183.908 Hz  
FIDRES 0.147067 Hz  
AQ 3.398709 sec  
RG 322.5  
DW 69.600 usec  
DE 6.00 usec  
TE 289.2 K  
D1 6.5999990 sec  
MCREST 0.0000000 sec  
MCWRR 0.01500000 sec

===== CHANNEL f1 =====  
NUC1 1H  
P1 9.40 usec  
PL1 0.00 dB  
SFO1 300.1330010 MHz

F2 - Processing Parameters  
SI 65536  
SF 300.130062 MHz  
WDW EM  
SSB 0  
LB 0.30 Hz  
GB 0  
PC 2.00

*D. M. A.*  
*19n1c*

10383690, RX0002/44B, BRUKER DPX300, QNP, H1 SPECTRUM, SOLV:-CDCL3/TMS

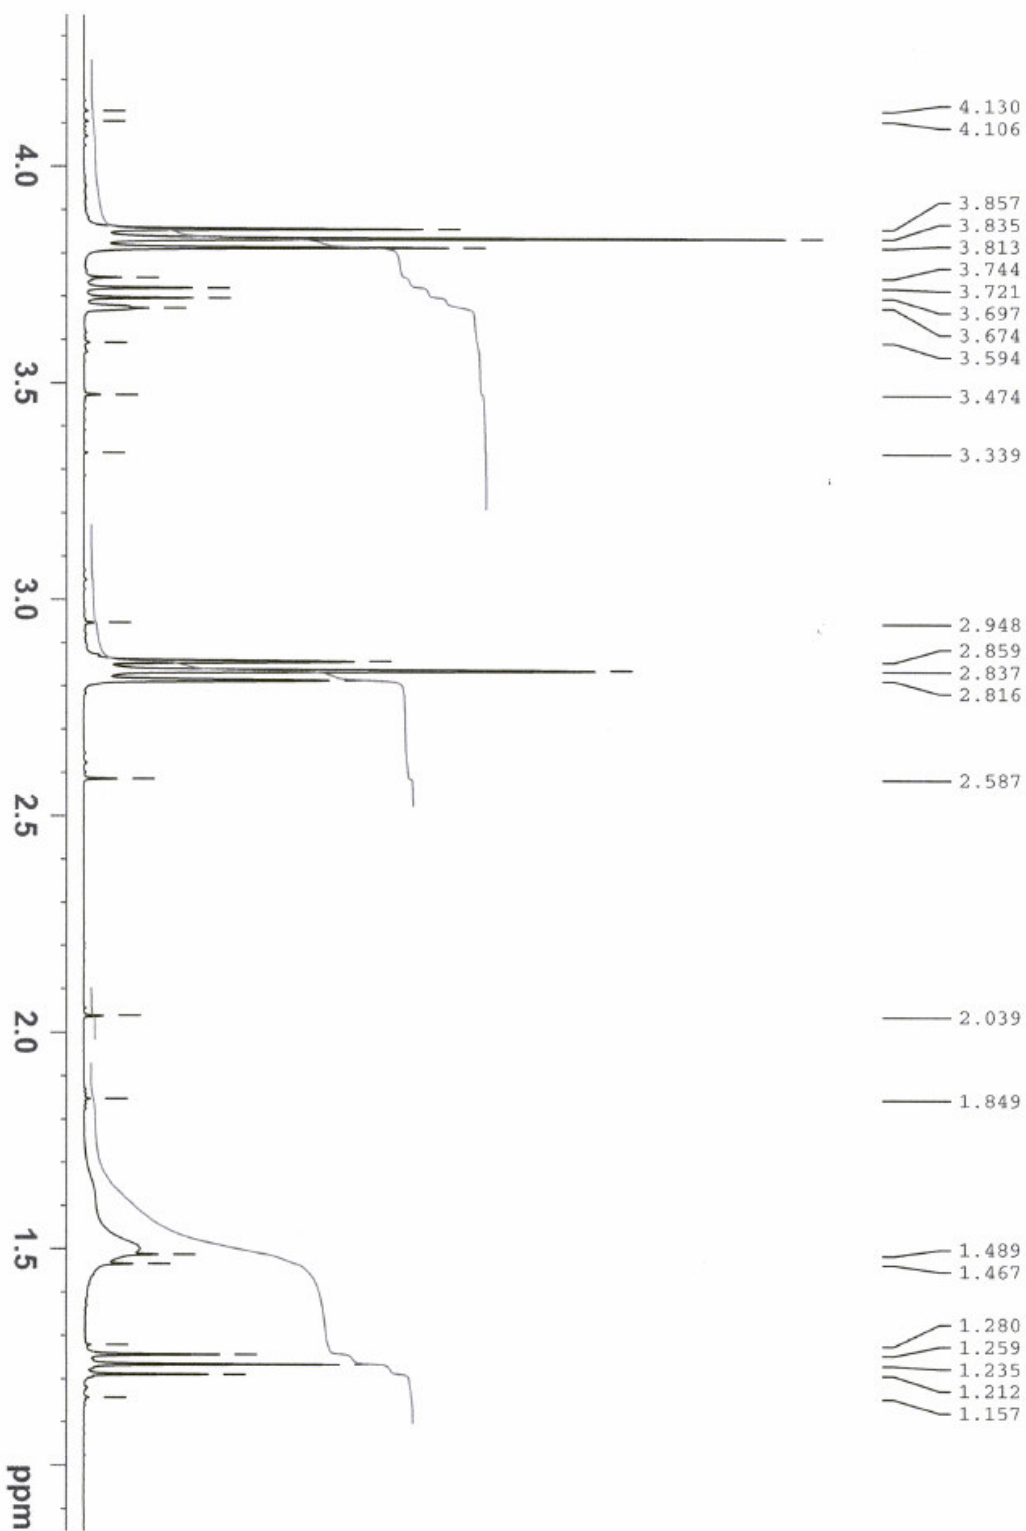

**Intertek ASG**

Current Data Parameters  
 NAME 10383690  
 EXPNO 10  
 PROCNO 1

F2 - Acquisition Parameters  
 Date\_ 20060719  
 Time 12.18  
 INSTRUM dpx300  
 PROBD 5 mm QNP 1H/13  
 PULPROG zg30  
 TD 48848  
 SOLVENT CDCl3  
 NS 64  
 DS 2  
 SWH 7183.908 Hz  
 FIDRES 0.147067 Hz  
 AQ 3.398709 sec  
 RG 322.5  
 DW 69.600 usec  
 DE 6.00 usec  
 TE 299.2 K  
 DL 6.59999990 sec  
 MCOREST 0.00000000 sec  
 MCWRRK 0.01500000 sec

===== CHANNEL f1 =====  
 NUC1 1H  
 P1 9.40 usec  
 PL1 0.00 dB  
 SFO1 300.1330010 MHz

F2 - Processing parameters  
 SI 65536  
 SF 300.1300062 MHz  
 WDW EM  
 SSB 0  
 LB 0.30 Hz  
 GB 0  
 PC 2.00

~ 1.1.17

10383450, RX0002/38/3, BRUKER DPX300, QNP, H1 SPECTRUM, SOLV:-CDCL3/TMS

```
;zg30
;avance-version (02/05/31)
;1d sequence
;using 30 degree flip angle
#include <Avance.incl>
```

```
1 ze
2 30m
d1
p1*0.33 ph1
go=2 ph31
30m mc #0 to 2 F0(zd)
exit
```

```
ph1=0 2 2 0 1 3 3 1
ph31=0 2 2 0 1 3 3 1
```

```
;p1 : f1 channel - power level
;p1 : f1 channel - 90 degree
;dl : relaxation delay: 1-5 *
```

### TABLE 4 ENTRY 3

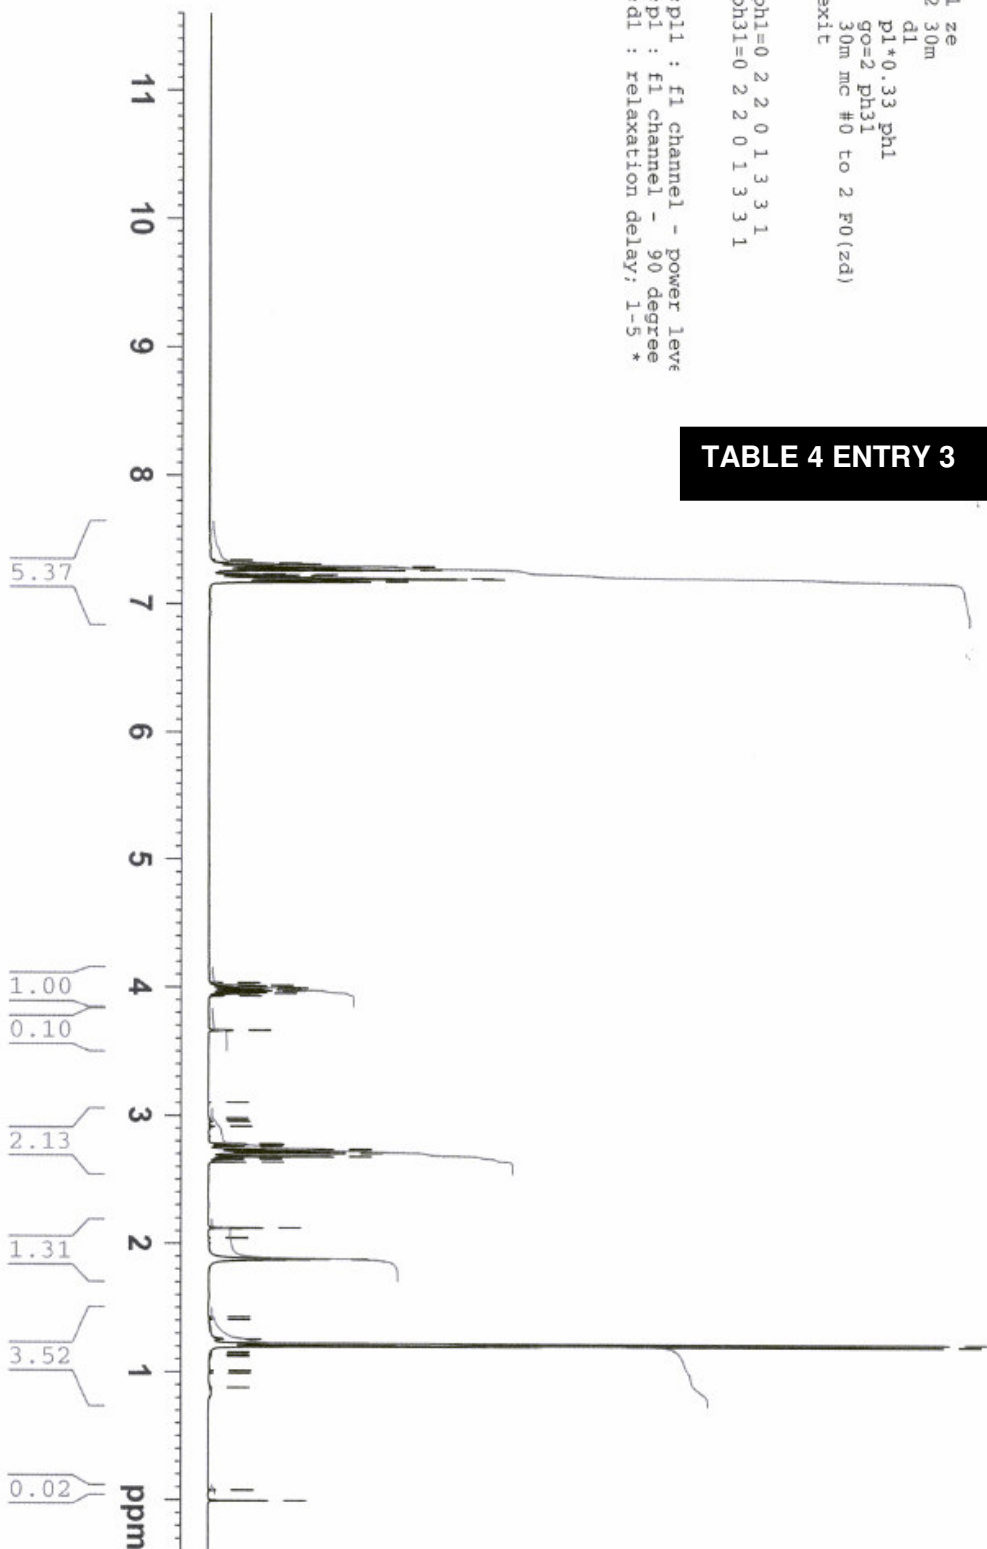

**Intertek** **ASG**

```
Current Data Parameters
NAME 10383450
EXPNO 10
PROCNO 1

F2 - Acquisition Parameters
Date_ 20060712
Time 12.45
INSTRUM dpx300
PROBHD 5 mm QNP 1H/13
PULPROG zg30
TD 48848
SOLVENT CDCl3
NS 64
DS 2
SWH 7183.908 Hz
FIDRES 0.147067 Hz
AQ 3.3998709 sec
RG 64
DE 69.600 usec
TE 299.2 K
D1 6.59999990 sec
MCREST 0.00000000 sec
MCWRR 0.01500000 sec

===== CHANNEL f1 =====
NUC1 1H
P1 9.40 usec
PL1 0.00 dB
SFO1 300.1350010 MHz

F2 - Processing parameters
SI 65536
SF 300.1300146 MHz
WDW EN
SSB 0
LB 0.30 Hz
GB 0
PC 2.00
```



10383450, RX0002/38/3, BRUKER DPX300, QNP, H1 SPECTRUM, SOLV:-CDCL3/TMS

7.345  
7.322  
7.317  
7.312  
7.301  
7.295  
7.283  
7.275  
7.270  
7.238  
7.233  
7.228  
7.205  
7.199  
7.190  
7.184  
7.178

5.37

7.6 7.5 7.4 7.3 7.2 7.1 7.0 6.9 6.8 6.7 ppm

**Intertek ASG**

Current Data Parameters  
NAME 10383450  
EXPNO 10  
PROCNO 1

F2 - Acquisition Parameters  
Date\_ 20060712  
Time 12.45  
INSTRUM dpx300  
PROBHD 5 mm QNP 1H/13  
PULPROG zg30  
TD 48848  
SOLVENT CDCl3  
NS 64  
DS 2  
SWH 7183.908 Hz  
FIDRES 0.147067 Hz  
AQ 3.398709 sec  
RG 64  
DW 69.600 usec  
DE 6.00 usec  
TE 299.2 K  
D1 6.5999990 sec  
MCREST 0.0000000 sec  
MCMRK 0.01500000 sec

==== CHANNEL f1 =====  
NUC1 1H  
P1 9.40 usec  
PL 0.00 dB  
SFO1 300.1330010 MHz  
  
F2 - Processing parameters  
SI 65536  
SF 300.1300146 MHz  
WDW EM  
SSB 0  
LB 0.30 Hz  
GB 0  
PC 2.00

*P. Hest*

LV303420, FX0002/38/3, BRUKER DPX300, QNP, H1 SPECTRUM, SOLV:-CDCl3/TMS

4.037  
4.016  
4.011  
3.998  
3.995  
3.991  
3.978  
3.973  
3.970  
3.957  
3.953  
3.932

3.667

3.107  
2.987  
2.968  
2.959  
2.921

2.784  
2.781  
2.767  
2.739  
2.722  
2.711  
2.685  
2.666  
2.640

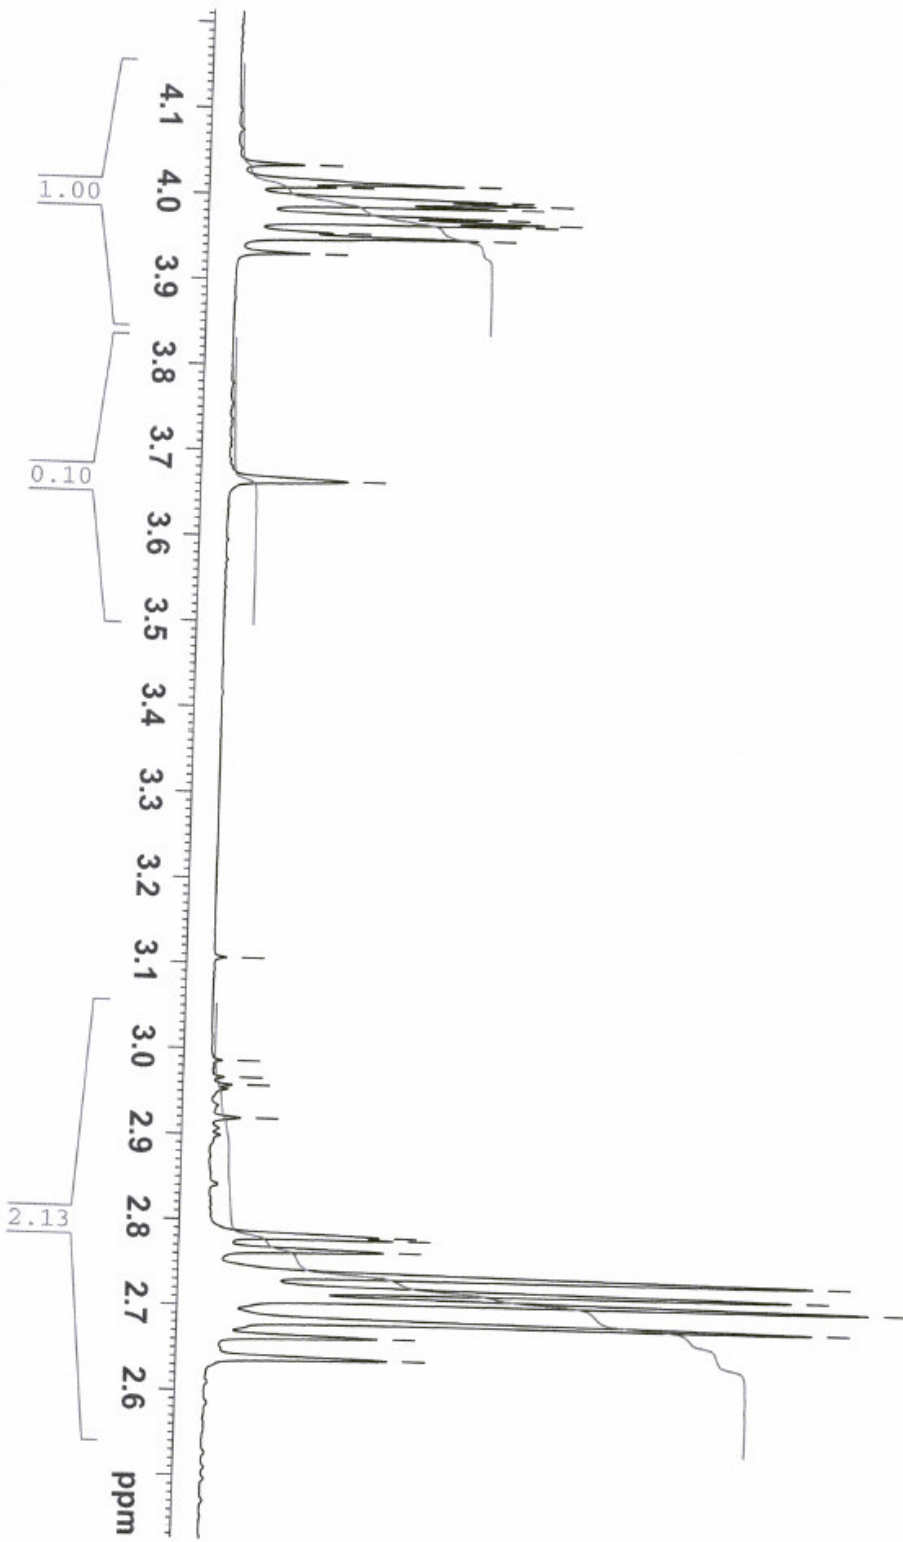

**Intertek ASG**

Current Data Parameters  
NAME 10383450  
EXPNO 10  
PROCNO 1

F2 - Acquisition Parameters  
Date\_ 20060712

Time 12.45  
INSTRUM dpX300  
PROBHD 5 mm QNP 1H/13  
PULPROG zgpg30  
TD 48848  
SOLVENT CDCl3  
NS 64  
DS 2

SWH 7183.908 Hz  
FIDRES 0.147067 Hz  
AQ 3.3998709 sec  
RG 64

DM 69.600 usec  
DE 6.00 usec  
TE 299.2 K  
D1 6.59999990 sec  
MCREST 0.00000000 sec  
MCNRR 0.01500000 sec

===== CHANNEL f1 =====  
NUC1 1H  
P1 9.40 usec  
PL1 0.00 dB  
SFO1 300.1330010 MHz

F2 - Processing parameters  
SI 65536  
SF 300.1300146 MHz  
WDW EM  
SSB 0  
LB 0.30 Hz  
GB 0  
PC 2.00

*D. Nord*

10383450, RX0002/38/3, BRUKER DPX300, QNP, H1 SPECTRUM, SOLV:-CDCL3/TMS

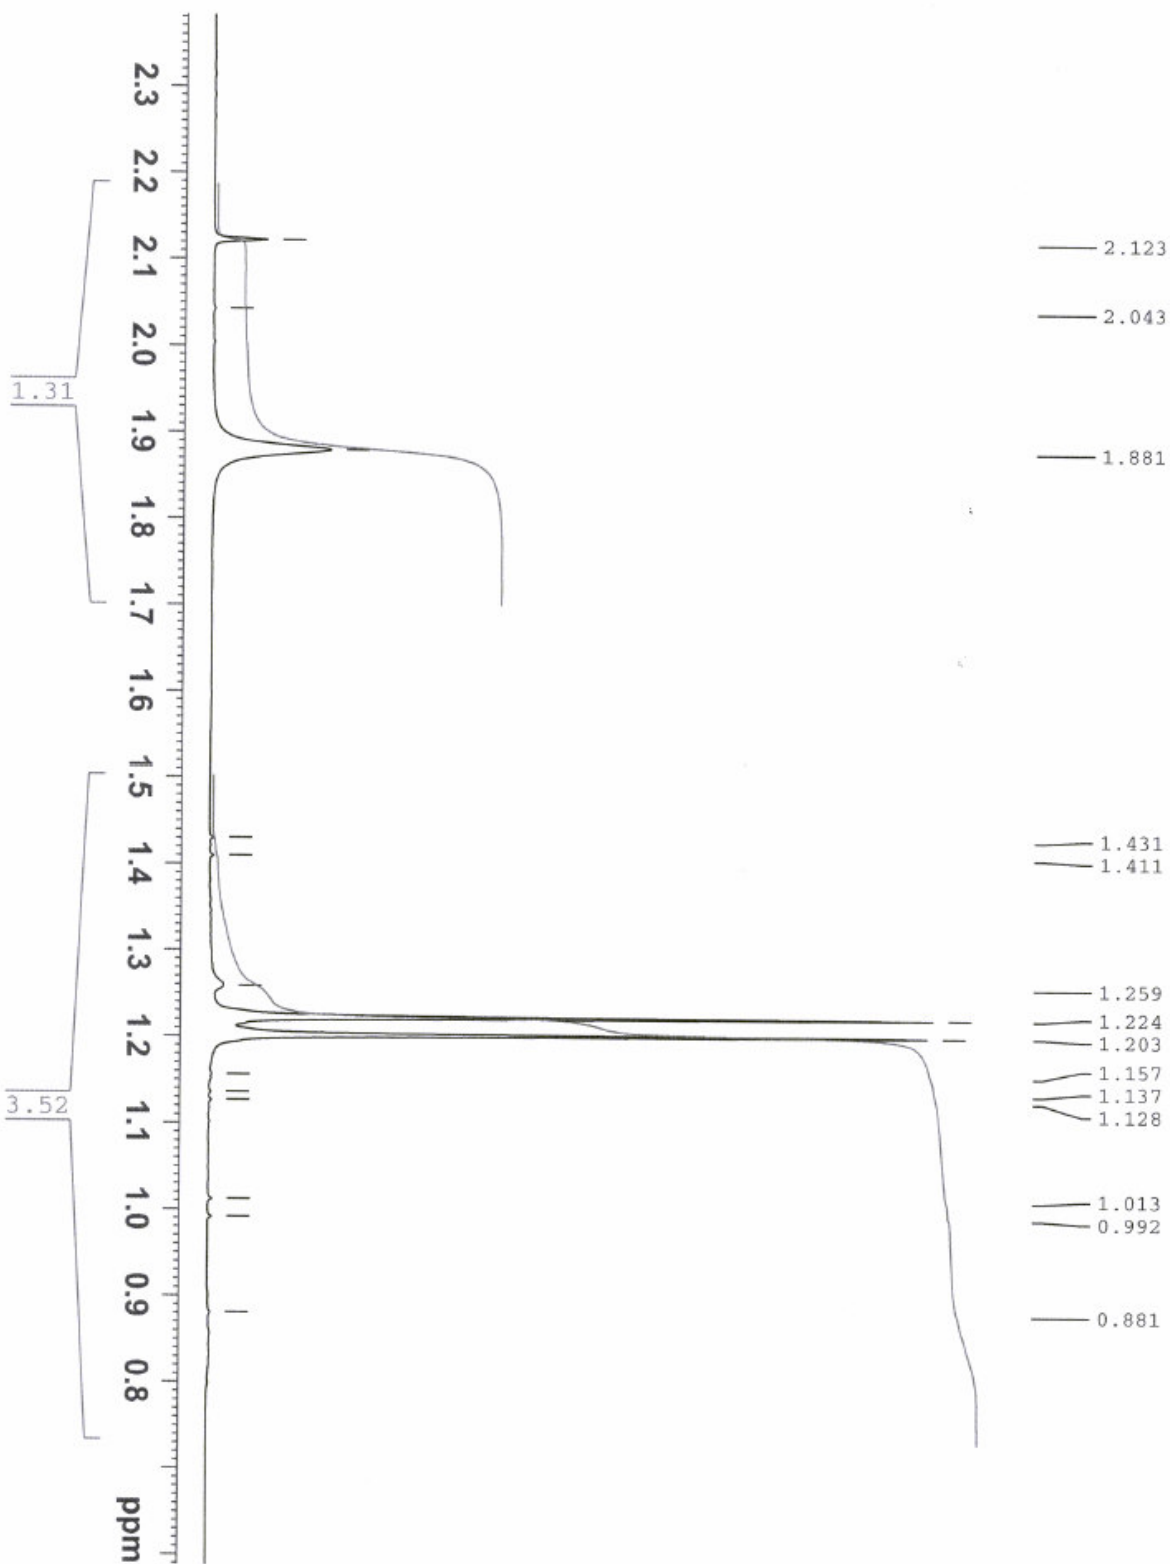

**Intertek** **ASG**

Current Data Parameters  
 NAME 10383450  
 EXPNO 10  
 PROCNO 1

F2 - Acquisition Parameters  
 Date\_ 20060712  
 Time 12.45  
 INSTRUM dpx300  
 PROBHD 5 mm QNP 1H/13  
 PULPROG zg30  
 TD 48848  
 SOLVENT CDCl3  
 NS 64  
 DS 2  
 SWH 7183.908 Hz  
 FIDRES 0.147067 Hz  
 AQ 3.3998709 sec  
 RG 64  
 DW 69.600 usec  
 DE 6.00 usec  
 TE 299.2 K  
 D1 6.59999990 sec  
 MCREST 0.00000000 sec  
 MCWK 0.01500000 sec

===== CHANNEL f1 =====  
 NUC1 1H  
 P1 9.40 usec  
 PL1 0.00 dB  
 SFO1 300.1330010 MHz

F2 - Processing parameters  
 SI 65536  
 SF 300.1300146 MHz  
 WDW EM  
 SSB 0  
 LB 0.30 Hz  
 GB 0  
 PC 2.00

*P. West*

10383691, RX0002/44C, BRUKER DPX300, QNP, H1 SPECTRUM, SOLV:-CDCL3/TMS

1-04

**Intertek ASG**

```

;zg30          50.41
;advance-version (02/05/91) 7.329
;1d sequence   7.324
;using 30 degree flip angle 7.314
                                     7.308
                                     7.296
                                     7.287
                                     7.283
                                     7.255
                                     7.250
                                     7.245
                                     7.223
                                     7.217
                                     7.201
                                     7.196
                                     4.841
                                     4.824
                                     4.269
                                     3.960
                                     3.950
                                     3.936
                                     3.930
                                     3.925
                                     3.916
                                     3.911
                                     3.906
                                     3.901
                                     3.892
                                     3.882
                                     3.795
                                     3.727
                                     3.715
                                     3.704
                                     3.682
                                     3.672
                                     3.657
                                     3.645
                                     3.634
                                     3.517
                                     3.494
                                     3.480
                                     3.457
                                     2.939
                                     2.862
                                     2.815
                                     2.795
                                     2.769
                                     2.760
                                     2.750
                                     2.735
                                     2.714
                                     2.689
                                     2.469
                                     1.316
                                     1.309
#include <Advance.incl>

```

```

1 ze
2 30m
d1
p1*0.33 ph1
go=2 ph31
30m mc #0 to 2 F0(zd)
exit
ph1=0 2 2 0 1 3 3 1
ph31=0 2 2 0 1 3 3 1

```

```

;p11 : f1 channel - power leve
;p1 : f1 channel - 90 degree
;d1 : relaxation delay; 1-5 *

```

# TABLE 4 ENTRY 4

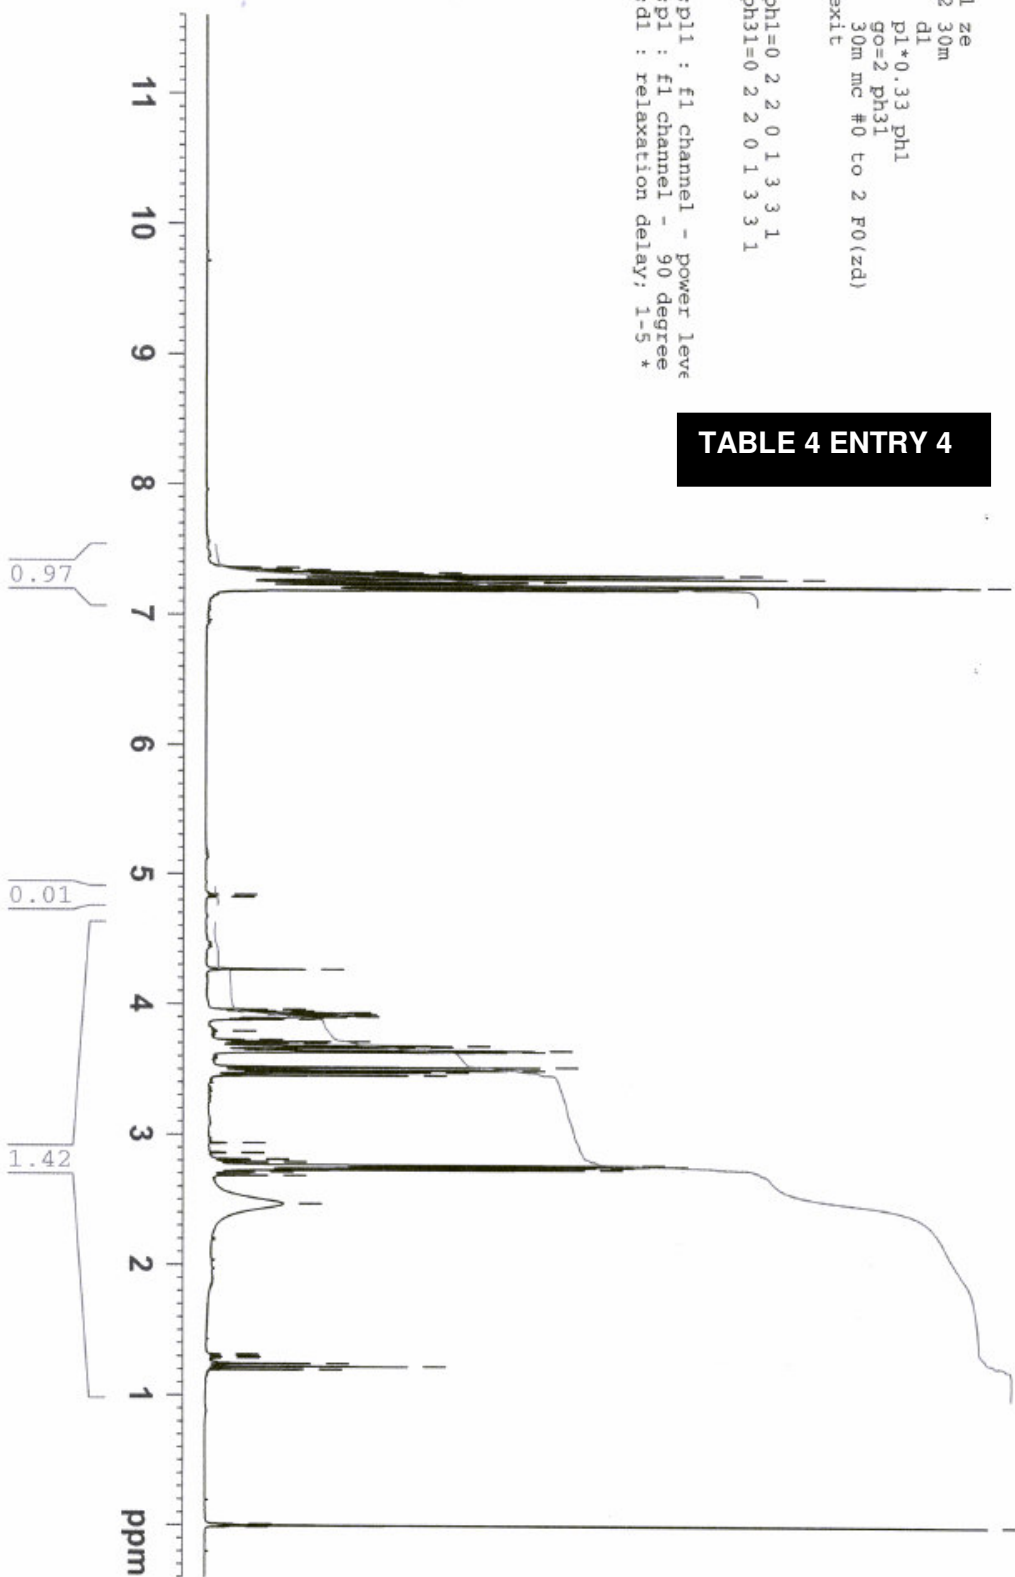

Current Data Parameters  
NAME 10383691  
EXPNO 10  
PROCNO 1

F2 - Acquisition Parameters  
Date\_ 20060719  
Time 12.35  
INSTRUM dpx300  
PROBHD 5 mm QNP 1H/13  
PULPROG zg30  
TD 48848  
SOLVENT CDCl3  
NS 64  
DS 2

SWH 7183.908 Hz  
FIDRES 0.147067 Hz  
AQ 3.3998709 sec  
RG 322.5  
DW 69.600 usec  
DE 6.00 usec  
TE 299.2 K  
D1 6.59999990 sec  
MCREST 0.00000000 sec  
MCWRK 0.01500000 sec

===== CHANNEL f1 =====  
NUC1 1H  
P1 9.40 usec  
PL1 0.00 dB  
SFO1 300.1330010 MHz

F2 - Processing parameters  
SI 65536  
SF 300.1300075 MHz  
WDW EM  
SSB 0  
LB 0.30 Hz  
GB 0  
PC 2.00

*D. N. V. K.*  
19/7/06
